# Supplementary material for: Hierarchically structured conducting polymer hydrogels with enhanced stretchability and conductivity via freeze-casting and salting-out with oxidant salts
Source: Royal Society of Chemistry journal article supplement (doi:10.1039/d5tc00203f), 2025-01-01
Supplement: d5tc00203f1.zip [file d5tc00203f1.zip]

## Sheet: Sheet1
Fig. 3(a)	PEDOT/DF-SO gel				Cross-sectional area/mm^2	8.3454		DF-SO gel					Cross-sectional area/mm^2	8.26		DFT gel					Cross-sectional area/mm^2	14.19
Time	Test Force	Stroke	Strain	Stress	Length/mm	9.1		Time	Test Force	Stroke	Strain	Stress	Length/mm	12		Time	Test Force	Stroke	Strain	Stress	Length/mm	17.8
sec	N	mm	%	N/mm^2	Volume/mm^3	75.9431		sec	N	mm	%	N/mm^2	Volume/mm^3	99.12		sec	N	mm	%	N/mm^2	Volume/mm^3	252.582
0	0.00707308	0.000625	0.00686813	0.000847543				0	0.00127157	0.000625	0.00686813	0.000152367				0	0.00254313	0.00175	0.0192308	0.000304735
0.01	0.00516574	0.007875	0.0865385	0.000618992				0.01	0.00254313	0.00775	0.0851648	0.000304735				0.01	0.000317891	0.005875	0.0645604	3.80918e-05
0.02	0.00667572	0.01575	0.173077	0.000799928				0.02	0.00603994	0.0155	0.17033	0.000723744				0.02	-0.00135104	0.01575	0.173077	-0.00016189
0.03	0.0134309	0.024	0.263736	0.00160938				0.03	0.00929832	0.023125	0.254121	0.00111419				0.03	0.00166893	0.02625	0.288462	0.000199982
0.04	0.0220935	0.03175	0.348901	0.00264738				0.04	0.0121593	0.031125	0.342033	0.00145701				0.04	0.00707308	0.0355	0.39011	0.000847543
0.05	0.0294844	0.040375	0.443681	0.00353302				0.05	0.0148614	0.04125	0.453297	0.00178079				0.05	0.00834465	0.042875	0.471154	0.00099991
0.06	0.0375112	0.05075	0.557692	0.00449483				0.06	0.0169277	0.051625	0.567308	0.00202839				0.06	0.00437101	0.049	0.538462	0.000523762
0.07	0.0505447	0.060625	0.666209	0.0060566				0.07	0.0187556	0.06075	0.667582	0.00224742				0.07	0.000317891	0.056875	0.625	3.80918e-05
0.08	0.0671546	0.068875	0.756868	0.0080469				0.08	0.0212987	0.067875	0.745879	0.00255215				0.08	0.000317891	0.066125	0.726648	3.80918e-05
0.09	0.0829697	0.075625	0.831044	0.00994196				0.09	0.0258287	0.074	0.813187	0.00309496				0.09	0.00166893	0.075375	0.828297	0.000199982
0.1	0.0991027	0.081875	0.899725	0.0118751				0.1	0.0329812	0.082	0.901099	0.00395203				0.1	0.00111262	0.08525	0.936813	0.000133321
0.11	0.117381	0.09075	0.997253	0.0140654				0.11	0.0397364	0.09125	1.00275	0.00476148				0.11	0.000715256	0.093125	1.02335	8.57066e-05
0.12	0.13566	0.101	1.10989	0.0162557				0.12	0.0436306	0.101	1.10989	0.0052281				0.12	0.00206629	0.10075	1.10714	0.000247597
0.13	0.151157	0.11075	1.21703	0.0181127				0.13	0.0472069	0.110625	1.21566	0.00565663				0.13	0.00270208	0.108625	1.19368	0.00032378
0.14	0.165701	0.119125	1.30907	0.0198554				0.14	0.0534058	0.118	1.2967	0.00639942				0.14	0.00111262	0.116375	1.27885	0.000133321
0.15	0.182152	0.12525	1.37637	0.0218266				0.15	0.0603994	0.125375	1.37775	0.00723744				0.15	-0.000715256	0.124875	1.37225	-8.57066e-05
0.16	0.199636	0.1325	1.45604	0.0239217				0.16	0.0650883	0.133375	1.46566	0.0077993				0.16	-0.000397364	0.135375	1.48764	-4.76148e-05
0.17	0.215054	0.141375	1.55357	0.0257691				0.17	0.0684261	0.14125	1.5522	0.00819926				0.17	0	0.14475	1.59066	0
0.18	0.229359	0.150375	1.65247	0.0274832				0.18	0.0739098	0.1505	1.65385	0.00885635				0.18	-0.00214577	0.1525	1.67582	-0.00025712
0.19	0.246366	0.16025	1.76099	0.0295212				0.19	0.080506	0.16075	1.76648	0.00964675				0.19	-0.00341733	0.159	1.74725	-0.000409487
0.2	0.265757	0.168625	1.85302	0.0318448				0.2	0.084877	0.169625	1.86401	0.0101705				0.2	-0.00055631	0.165875	1.8228	-6.66607e-05
0.21	0.282764	0.176375	1.93819	0.0338827				0.21	0.0871023	0.176875	1.94368	0.0104372				0.21	0.00238419	0.1755	1.92857	0.000285689
0.22	0.296036	0.18425	2.02473	0.035473				0.22	0.0920296	0.183625	2.01786	0.0110276				0.22	0.000476837	0.186125	2.04533	5.71377e-05
0.23	0.310183	0.19175	2.10714	0.0371681				0.23	0.0998974	0.191	2.0989	0.0119704				0.23	-0.00286102	0.19525	2.1456	-0.000342826
0.24	0.327905	0.20025	2.20055	0.0392917				0.24	0.106255	0.201	2.20879	0.0127322				0.24	-0.00214577	0.2025	2.22527	-0.00025712
0.25	0.34523	0.210625	2.31456	0.0413677				0.25	0.109355	0.211375	2.3228	0.0131036				0.25	0.00150998	0.20825	2.28846	0.000180936
0.26	0.359217	0.219875	2.41621	0.0430437				0.26	0.112693	0.220125	2.41896	0.0135035				0.26	0.00270208	0.21625	2.37637	0.00032378
0.27	0.37233	0.2275	2.5	0.044615				0.27	0.119448	0.226875	2.49313	0.014313				0.27	0.000874201	0.225625	2.4794	0.000104752
0.28	0.388543	0.234125	2.5728	0.0465577				0.28	0.126839	0.232875	2.55907	0.0151986				0.28	7.94729e-05	0.235375	2.58654	9.52295e-06
0.29	0.406265	0.241	2.64835	0.0486813				0.29	0.130733	0.24125	2.6511	0.0156653				0.29	0.00166893	0.24475	2.68956	0.000199982
0.3	0.421127	0.250625	2.75412	0.0504621				0.3	0.133435	0.25125	2.76099	0.015989				0.3	0.0029405	0.251375	2.76236	0.000352349
0.31	0.43424	0.26125	2.87088	0.0520334				0.31	0.139634	0.261125	2.86951	0.0167318				0.31	0.00135104	0.2585	2.84066	0.00016189
0.32	0.449896	0.270375	2.97115	0.0539094				0.32	0.147661	0.269625	2.96291	0.0176937				0.32	-0.000794729	0.266875	2.93269	-9.52295e-05
0.33	0.467857	0.2775	3.04945	0.0560616				0.33	0.151952	0.27575	3.03022	0.0182079				0.33	-0.000317891	0.27525	3.02473	-3.80918e-05
0.34	0.48391	0.28325	3.11264	0.0579853				0.34	0.152985	0.283125	3.11126	0.0183317				0.34	0.00206629	0.285	3.13187	0.000247597
0.35	0.497023	0.29125	3.20055	0.0595566				0.35	0.156721	0.29175	3.20604	0.0187793				0.35	0.00127157	0.29425	3.23352	0.000152367
0.36	0.510693	0.300875	3.30632	0.0611945				0.36	0.164032	0.300625	3.30357	0.0196554				0.36	-0.00214577	0.30225	3.32143	-0.00025712
0.37	0.527938	0.310625	3.41346	0.063261				0.37	0.170231	0.310625	3.41346	0.0203982				0.37	-0.00246366	0.30975	3.40385	-0.000295212
0.38	0.545422	0.31975	3.51374	0.065356				0.38	0.174125	0.319125	3.50687	0.0208648				0.38	0.00150998	0.316875	3.48214	0.000180936
0.39	0.560284	0.32625	3.58516	0.0671368				0.39	0.178734	0.32675	3.59066	0.0214171				0.39	0.00373522	0.324875	3.57005	0.000447579
0.4	0.574271	0.33325	3.66209	0.0688129				0.4	0.185331	0.33425	3.67308	0.0222075				0.4	0.00166893	0.335375	3.68544	0.000199982
0.41	0.589848	0.34175	3.75549	0.0706794				0.41	0.19145	0.34175	3.75549	0.0229408				0.41	0.000476837	0.345125	3.79258	5.71377e-05
0.42	0.606378	0.350375	3.85027	0.0726601				0.42	0.195503	0.3505	3.85165	0.0234265				0.42	0.00214577	0.35325	3.88187	0.00025712
0.43	0.621319	0.360125	3.95742	0.0744505				0.43	0.199874	0.360875	3.96566	0.0239502				0.43	0.0029405	0.359625	3.95192	0.000352349
0.44	0.634988	0.369125	4.05632	0.0760884				0.44	0.206629	0.36975	4.06319	0.0247597				0.44	0.00166893	0.366125	4.02335	0.000199982
0.45	0.649293	0.376875	4.14148	0.0778025				0.45	0.213067	0.3775	4.14835	0.025531				0.45	0.000874201	0.375375	4.125	0.000104752
0.46	0.664155	0.384375	4.2239	0.0795833				0.46	0.217597	0.384125	4.22115	0.0260738				0.46	0.00103315	0.385875	4.24038	0.000123798
0.47	0.678539	0.391875	4.30632	0.081307				0.47	0.22165	0.391125	4.29808	0.0265595				0.47	0.00103315	0.39525	4.34341	0.000123798
0.48	0.693401	0.400125	4.39698	0.0830878				0.48	0.227213	0.401	4.40659	0.0272261				0.48	0.000874201	0.40275	4.42582	0.000104752
0.49	0.709375	0.410625	4.51236	0.0850019				0.49	0.232855	0.411625	4.52335	0.0279023				0.49	0.00127157	0.4085	4.48901	0.000152367
0.5	0.724713	0.42	4.61538	0.0868398				0.5	0.237147	0.4205	4.62088	0.0284165				0.5	0.0017484	0.41625	4.57418	0.000209505
0.51	0.737985	0.42775	4.70055	0.0884302				0.51	0.24128	0.4275	4.6978	0.0289117				0.51	0.00206629	0.42575	4.67857	0.000247597
0.52	0.750939	0.434375	4.77335	0.0899824				0.52	0.247796	0.43325	4.76099	0.0296926				0.52	0.00166893	0.435375	4.78434	0.000199982
0.53	0.766595	0.44125	4.8489	0.0918584				0.53	0.254154	0.441375	4.85027	0.0304544				0.53	0.00166893	0.44475	4.88736	0.000199982
0.54	0.783523	0.4505	4.95055	0.0938868				0.54	0.257651	0.45125	4.95879	0.0308734				0.54	0.00270208	0.45175	4.96429	0.00032378
0.55	0.798543	0.461	5.06593	0.0956866				0.55	0.260194	0.461125	5.06731	0.0311782				0.55	0.00317891	0.458875	5.04258	0.000380918
0.56	0.811736	0.47025	5.16758	0.0972675				0.56	0.265916	0.46975	5.16209	0.0318638				0.56	0.0017484	0.467125	5.13324	0.000209505
0.57	0.825961	0.477625	5.24863	0.0989721				0.57	0.273943	0.476125	5.23214	0.0328256				0.57	0.00127157	0.475375	5.2239	0.000152367
0.58	0.842174	0.483375	5.31181	0.100915				0.58	0.279506	0.483375	5.31181	0.0334922				0.58	0.00341733	0.485	5.32967	0.000409487
0.59	0.856717	0.491125	5.39698	0.102657				0.59	0.282049	0.49175	5.40385	0.033797				0.59	0.00500679	0.494375	5.43269	0.000599946
0.6	0.868082	0.50075	5.50275	0.104019				0.6	0.286897	0.500625	5.50137	0.0343779				0.6	0.0029405	0.50225	5.51923	0.000352349
0.61	0.88048	0.510625	5.61126	0.105505				0.61	0.294606	0.51075	5.61264	0.0353016				0.61	-0.000317891	0.509875	5.60302	-3.80918e-05
0.62	0.896692	0.51975	5.71154	0.107447				0.62	0.300566	0.519125	5.70467	0.0360158				0.62	7.94729e-05	0.517	5.68132	9.52295e-06
0.63	0.913143	0.526625	5.78709	0.109419				0.63	0.302553	0.526375	5.78434	0.0362539				0.63	0.00309944	0.525	5.76923	0.000371395
0.64	0.926971	0.53375	5.86538	0.111076				0.64	0.305891	0.534	5.86813	0.0366538				0.64	0.0038147	0.5355	5.88462	0.000457102
0.65	0.940561	0.542	5.95605	0.112704				0.65	0.31352	0.5415	5.95055	0.037568				0.65	0.00135104	0.545375	5.99313	0.00016189
0.66	0.956535	0.5505	6.04945	0.114618				0.66	0.320911	0.5505	6.04945	0.0384537				0.66	0.000238419	0.553375	6.08104	2.85689e-05
0.67	0.972668	0.560375	6.15797	0.116551				0.67	0.324329	0.560875	6.16346	0.0388632				0.67	0.00254313	0.56	6.15385	0.000304735
0.68	0.986258	0.569375	6.25687	0.11818				0.68	0.327269	0.57	6.26374	0.0392155				0.68	0.00437101	0.566375	6.2239	0.000523762
0.69	0.997941	0.577	6.34066	0.11958				0.69	0.33323	0.5775	6.34615	0.0399297				0.69	0.00190735	0.575375	6.3228	0.000228551
0.7	1.01129	0.5845	6.42308	0.12118				0.7	0.340621	0.584	6.41758	0.0408154				0.7	-0.000953674	0.585875	6.43819	-0.000114275
0.71	1.02743	0.591875	6.50412	0.123113				0.71	0.346263	0.591	6.49451	0.0414915				0.71	0.000476837	0.595375	6.54258	5.71377e-05
0.72	1.04316	0.600125	6.59478	0.124998				0.72	0.350157	0.601	6.6044	0.0419581				0.72	0.00341733	0.60275	6.62363	0.000409487
0.73	1.05556	0.610625	6.71016	0.126484				0.73	0.355005	0.611375	6.71841	0.042539				0.73	0.00397364	0.60875	6.68956	0.000476148
0.74	1.06811	0.620125	6.81456	0.127988				0.74	0.361204	0.620125	6.81456	0.0432818				0.74	0.0029405	0.616375	6.77335	0.000352349
0.75	1.08353	0.628	6.9011	0.129836				0.75	0.366131	0.626875	6.88874	0.0438723				0.75	0.00230471	0.625625	6.875	0.000276166
0.76	1.09935	0.634625	6.9739	0.131731				0.76	0.36931	0.633	6.95604	0.0442532				0.76	0.0017484	0.63525	6.98077	0.000209505
0.77	1.11262	0.641125	7.04533	0.133321				0.77	0.373761	0.64125	7.0467	0.0447864				0.77	0.00111262	0.644875	7.08654	0.000133321
0.78	1.12549	0.65075	7.1511	0.134864				0.78	0.380119	0.651125	7.15522	0.0455483				0.78	0.00309944	0.65175	7.16209	0.000371395
0.79	1.13972	0.66125	7.26648	0.136569				0.79	0.386079	0.660875	7.26236	0.0462625				0.79	0.00603994	0.65875	7.23901	0.000723744
0.8	1.15434	0.6705	7.36813	0.138321				0.8	0.390291	0.66975	7.35989	0.0467672				0.8	0.00278155	0.667125	7.33104	0.000333303
0.81	1.16746	0.67775	7.4478	0.139892				0.81	0.395616	0.676125	7.42995	0.0474053				0.81	-0.00365575	0.675375	7.4217	-0.000438056
0.82	1.18033	0.683625	7.51236	0.141435				0.82	0.40253	0.683375	7.50962	0.0482338				0.82	-0.000397364	0.685	7.52747	-4.76148e-05
0.83	1.19448	0.691375	7.59753	0.14313				0.83	0.407775	0.69175	7.60165	0.0488623				0.83	0.0104109	0.694375	7.63049	0.00124751
0.84	1.2087	0.701	7.7033	0.144835				0.84	0.410398	0.700625	7.69918	0.0491765				0.84	0.0101725	0.70225	7.71703	0.00121894
0.85	1.22182	0.71075	7.81044	0.146406				0.85	0.413895	0.71075	7.81044	0.0495955				0.85	-0.000953674	0.709875	7.80082	-0.000114275
0.86	1.23501	0.72	7.91209	0.147987				0.86	0.42065	0.71925	7.90385	0.050405				0.86	-0.0026226	0.716875	7.87775	-0.000314257
0.87	1.24987	0.726625	7.98489	0.149768				0.87	0.427484	0.7265	7.98352	0.051224				0.87	0.00667572	0.724875	7.96566	0.000799928
0.88	1.26441	0.733875	8.06456	0.15151				0.88	0.431458	0.734	8.06593	0.0517001				0.88	0.0103315	0.735375	8.08104	0.00123798
0.89	1.27737	0.742125	8.15522	0.153062				0.89	0.435273	0.741625	8.14973	0.0521572				0.89	0.00540415	0.745125	8.18819	0.000647561
0.9	1.29072	0.750625	8.24863	0.154662				0.9	0.442346	0.7505	8.24725	0.0530048				0.9	0.00214577	0.753	8.27473	0.00025712
0.91	1.30582	0.760375	8.35577	0.156472				0.91	0.449657	0.760875	8.36126	0.0538809				0.91	0.00309944	0.759625	8.34753	0.000371395
0.92	1.32068	0.769625	8.45742	0.158252				0.92	0.452439	0.769875	8.46016	0.0542142				0.92	0.00588099	0.766125	8.41896	0.000704699
0.93	1.33324	0.77725	8.54121	0.159757				0.93	0.453154	0.777375	8.54258	0.0542999				0.93	0.00786781	0.775375	8.5206	0.000942772
0.94	1.34516	0.784625	8.62225	0.161186				0.94	0.458161	0.784125	8.61676	0.0548998				0.94	0.00564257	0.785875	8.63599	0.00067613
0.95	1.35915	0.792	8.7033	0.162862				0.95	0.466744	0.791125	8.69368	0.0559283				0.95	0.00166893	0.795375	8.74038	0.000199982
0.96	1.37472	0.80025	8.79396	0.164728				0.96	0.472148	0.801	8.8022	0.0565759				0.96	0.00238419	0.802875	8.8228	0.000285689
0.97	1.38791	0.810875	8.91072	0.166309				0.97	0.474374	0.811625	8.91896	0.0568425				0.97	0.00691414	0.808625	8.88599	0.000828497
0.98	1.3984	0.820375	9.01511	0.167566				0.98	0.479301	0.8205	9.01648	0.0574329				0.98	0.00770887	0.8165	8.97253	0.000923727
0.99	1.40977	0.82825	9.10165	0.168928				0.99	0.487963	0.82725	9.09066	0.0584709				0.99	0.0038147	0.82575	9.07418	0.000457102
1	1.42495	0.83475	9.17308	0.170747				1	0.495354	0.83325	9.15659	0.0593566				1	0.00150998	0.835375	9.17995	0.000180936
1.01	1.44037	0.841375	9.24588	0.172594				1.01	0.498136	0.8415	9.24725	0.0596899				1.01	0.00421206	0.844875	9.28434	0.000504716
1.02	1.45253	0.85075	9.3489	0.174051				1.02	0.50052	0.85125	9.3544	0.0599756				1.02	0.00691414	0.85175	9.35989	0.000828497
1.03	1.46365	0.86125	9.46429	0.175384				1.03	0.507116	0.861125	9.46291	0.060766				1.03	0.00460943	0.85875	9.43681	0.000552331
1.04	1.47804	0.8705	9.56593	0.177108				1.04	0.51562	0.87	9.56044	0.0617849				1.04	0.0017484	0.867125	9.52885	0.000209505
1.05	1.49369	0.877625	9.64423	0.178984				1.05	0.520706	0.87625	9.62912	0.0623944				1.05	0.00421206	0.875375	9.61951	0.000504716
1.06	1.50665	0.883625	9.71016	0.180536				1.06	0.523011	0.883375	9.70742	0.0626706				1.06	0.0073115	0.885	9.72528	0.000876112
1.07	1.51761	0.8915	9.7967	0.18185				1.07	0.5277	0.891875	9.80082	0.0632324				1.07	0.0055631	0.8945	9.82967	0.000666607
1.08	1.53073	0.900875	9.89973	0.183422				1.08	0.534932	0.90075	9.89835	0.064099				1.08	0.00254313	0.902625	9.91896	0.000304735
1.09	1.54591	0.910625	10.0069	0.18524				1.09	0.540495	0.91075	10.0082	0.0647656				1.09	0.00333786	0.910125	10.0014	0.000399964
1.1	1.55957	0.919875	10.1085	0.186878				1.1	0.543912	0.91925	10.1016	0.0651751				1.1	0.00580152	0.917125	10.0783	0.000695176
1.11	1.5715	0.9265	10.1813	0.188307				1.11	0.548681	0.926875	10.1854	0.0657465				1.11	0.00619888	0.925	10.1648	0.00074279
1.12	1.58421	0.933625	10.2596	0.189831				1.12	0.555038	0.93425	10.2665	0.0665083				1.12	0.00460943	0.935375	10.2788	0.000552331
1.13	1.59828	0.942	10.3516	0.191516				1.13	0.560443	0.94175	10.3489	0.0671559				1.13	0.00437101	0.94525	10.3874	0.000523762
1.14	1.61155	0.950625	10.4464	0.193107				1.14	0.564496	0.9505	10.4451	0.0676415				1.14	0.00580152	0.95325	10.4753	0.000695176
1.15	1.62276	0.9605	10.5549	0.194449				1.15	0.568867	0.961	10.5604	0.0681653				1.15	0.00667572	0.959875	10.5481	0.000799928
1.16	1.6342	0.969375	10.6525	0.19582				1.16	0.574668	0.97	10.6593	0.0688605				1.16	0.00588099	0.96625	10.6181	0.000704699
1.17	1.64723	0.97675	10.7335	0.197382				1.17	0.58039	0.9775	10.7418	0.0695461				1.17	0.00460943	0.975375	10.7184	0.000552331
1.18	1.65955	0.984375	10.8173	0.198858				1.18	0.58492	0.984	10.8132	0.0700889				1.18	0.00500679	0.985875	10.8338	0.000599946
1.19	1.66988	0.991875	10.8997	0.200096				1.19	0.589609	0.991125	10.8915	0.0706508				1.19	0.00627836	0.99525	10.9368	0.000752313
1.2	1.68053	1.00012	10.9904	0.201372				1.2	0.595172	1.001	11	0.0713174				1.2	0.00603994	1.00287	11.0206	0.000723744
1.21	1.69333	1.01075	11.1071	0.202906				1.21	0.599782	1.0115	11.1154	0.0718697				1.21	0.00540415	1.00863	11.0838	0.000647561
1.22	1.70612	1.02025	11.2115	0.204439				1.22	0.602802	1.02025	11.2115	0.0722316				1.22	0.00667572	1.01625	11.1676	0.000799928
1.23	1.71653	1.028	11.2967	0.205686				1.23	0.606775	1.02713	11.2871	0.0727078				1.23	0.00723203	1.02563	11.2706	0.000866589
1.24	1.7275	1.0345	11.3681	0.207001				1.24	0.614087	1.03313	11.353	0.0735839				1.24	0.00460943	1.03525	11.3764	0.000552331
1.25	1.74244	1.04125	11.4423	0.208791				1.25	0.620683	1.04137	11.4437	0.0743743				1.25	0.00333786	1.04475	11.4808	0.000399964
1.26	1.75778	1.05075	11.5467	0.210629				1.26	0.623783	1.05113	11.5508	0.0747457				1.26	0.00588099	1.05163	11.5563	0.000704699
1.27	1.7693	1.06137	11.6635	0.212009				1.27	0.626961	1.06113	11.6607	0.0751266				1.27	0.00747045	1.05888	11.636	0.000895158
1.28	1.77892	1.0705	11.7637	0.213162				1.28	0.633955	1.06987	11.7569	0.0759646				1.28	0.00500679	1.06713	11.7266	0.000599946
1.29	1.791	1.07763	11.842	0.214609				1.29	0.640949	1.07612	11.8255	0.0768026				1.29	0.00373522	1.07525	11.8159	0.000447579
1.3	1.80491	1.0835	11.9066	0.216276				1.3	0.644207	1.08325	11.9038	0.0771931				1.3	0.00564257	1.08488	11.9217	0.00067613
1.31	1.81715	1.0915	11.9945	0.217742				1.31	0.646194	1.09175	11.9973	0.0774311				1.31	0.00707308	1.09438	12.0261	0.000847543
1.32	1.82764	1.101	12.0989	0.218999				1.32	0.651995	1.10075	12.0962	0.0781263				1.32	0.00540415	1.10225	12.1126	0.000647561
1.33	1.84019	1.11075	12.206	0.220504				1.33	0.66042	1.11075	12.206	0.0791358				1.33	0.00413259	1.10975	12.1951	0.000495194
1.34	1.85529	1.12	12.3077	0.222313				1.34	0.666221	1.119	12.2967	0.0798309				1.34	0.00603994	1.11688	12.2734	0.000723744
1.35	1.8692	1.1265	12.3791	0.22398				1.35	0.668049	1.12637	12.3777	0.08005				1.35	0.00890096	1.12488	12.3613	0.00106657
1.36	1.87929	1.1335	12.456	0.225189				1.36	0.670989	1.134	12.4615	0.0804023				1.36	0.00866254	1.13538	12.4766	0.001038
1.37	1.88875	1.142	12.5495	0.226323				1.37	0.678778	1.14162	12.5453	0.0813356				1.37	0.00588099	1.14525	12.5852	0.000704699
1.38	1.90139	1.15063	12.6442	0.227837				1.38	0.686169	1.15037	12.6415	0.0822212				1.38	0.00476837	1.15325	12.6731	0.000571377
1.39	1.91553	1.16037	12.7514	0.229532				1.39	0.688871	1.16075	12.7555	0.082545				1.39	0.00683467	1.15975	12.7445	0.000818974
1.4	1.92706	1.16938	12.8503	0.230913				1.4	0.690937	1.16962	12.853	0.0827926				1.4	0.00905991	1.16625	12.8159	0.00108562
1.41	1.93699	1.17725	12.9368	0.232103				1.41	0.697692	1.17738	12.9382	0.083602				1.41	0.00770887	1.1755	12.9176	0.000923727
1.42	1.94891	1.18475	13.0192	0.233531				1.42	0.705878	1.18388	13.0096	0.0845829				1.42	0.0055631	1.186	13.033	0.000666607
1.43	1.96242	1.192	13.0989	0.23515				1.43	0.709852	1.19112	13.0893	0.085059				1.43	0.00691414	1.19538	13.136	0.000828497
1.44	1.97379	1.20025	13.1896	0.236512				1.44	0.712077	1.201	13.1978	0.0853257				1.44	0.0101725	1.20287	13.2184	0.00121894
1.45	1.98269	1.21075	13.3049	0.237579				1.45	0.717481	1.2115	13.3132	0.0859732				1.45	0.00929832	1.20863	13.2816	0.00111419
1.46	1.99294	1.22025	13.4093	0.238807				1.46	0.724713	1.22025	13.4093	0.0868398				1.46	0.0055631	1.21637	13.3668	0.000666607
1.47	2.0055	1.228	13.4945	0.240312				1.47	0.729561	1.22725	13.4863	0.0874207				1.47	0.00476837	1.22588	13.4712	0.000571377
1.48	2.01742	1.2345	13.5659	0.24174				1.48	0.732501	1.23313	13.5508	0.0877731				1.48	0.00707308	1.23537	13.5755	0.000847543
1.49	2.02815	1.24125	13.6401	0.243026				1.49	0.73719	1.24137	13.6415	0.0883349				1.49	0.00866254	1.24475	13.6786	0.001038
1.5	2.03991	1.25075	13.7445	0.244435				1.5	0.743389	1.25125	13.75	0.0890777				1.5	0.00890096	1.25162	13.7541	0.00106657
1.51	2.05278	1.26137	13.8613	0.245978				1.51	0.748873	1.26113	13.8585	0.0897348				1.51	0.00929832	1.259	13.8352	0.00111419
1.52	2.06399	1.2705	13.9615	0.247321				1.52	0.752687	1.26975	13.9533	0.0901919				1.52	0.00929832	1.26713	13.9245	0.00111419
1.53	2.07408	1.27788	14.0426	0.24853				1.53	0.757217	1.27612	14.0234	0.0907347				1.53	0.00890096	1.2755	14.0165	0.00106657
1.54	2.08513	1.28375	14.1071	0.249854				1.54	0.763098	1.28337	14.103	0.0914394				1.54	0.00834465	1.28525	14.1236	0.00099991
1.55	2.09745	1.2915	14.1923	0.25133				1.55	0.767867	1.29175	14.1951	0.0920108				1.55	0.00786781	1.29462	14.2266	0.000942772
1.56	2.10865	1.30113	14.2981	0.252672				1.56	0.770966	1.30062	14.2926	0.0923822				1.56	0.0073115	1.30225	14.3104	0.000876112
1.57	2.11811	1.311	14.4066	0.253806				1.57	0.775337	1.31062	14.4025	0.0929059				1.57	0.00667572	1.30987	14.3942	0.000799928
1.58	2.12797	1.32	14.5055	0.254987				1.58	0.78249	1.31913	14.4959	0.093763				1.58	0.0064373	1.31713	14.4739	0.000771359
1.59	2.14005	1.32638	14.5755	0.256434				1.59	0.788848	1.3265	14.5769	0.0945248				1.59	0.00683467	1.32513	14.5618	0.000818974
1.6	2.15197	1.3335	14.6538	0.257863				1.6	0.792106	1.33413	14.6607	0.0949153				1.6	0.00723203	1.3355	14.6758	0.000866589
1.61	2.1615	1.34187	14.7459	0.259005				1.61	0.795603	1.34163	14.7431	0.0953343				1.61	0.00691414	1.34525	14.783	0.000828497
1.62	2.1716	1.35075	14.8434	0.260215				1.62	0.802279	1.35038	14.8393	0.0961342				1.62	0.00580152	1.35325	14.8709	0.000695176
1.63	2.18471	1.36062	14.9519	0.261786				1.63	0.808875	1.36088	14.9547	0.0969246				1.63	0.00627836	1.35987	14.9437	0.000752313
1.64	2.1979	1.36925	15.0467	0.263367				1.64	0.812133	1.37013	15.0563	0.0973151				1.64	0.00905991	1.36625	15.0137	0.00108562
1.65	2.20815	1.37688	15.1305	0.264595				1.65	0.814994	1.37775	15.1401	0.0976579				1.65	0.0103315	1.37538	15.114	0.00123798
1.66	2.21729	1.3845	15.2143	0.26569				1.66	0.821829	1.38425	15.2115	0.0984769				1.66	0.00770887	1.386	15.2308	0.000923727
1.67	2.22882	1.39187	15.2953	0.267071				1.67	0.830014	1.39125	15.2885	0.0994577				1.67	0.0055631	1.39538	15.3338	0.000666607
1.68	2.24137	1.40037	15.3887	0.268576				1.68	0.833988	1.40088	15.3942	0.0999339				1.68	0.00786781	1.40263	15.4135	0.000942772
1.69	2.25139	1.41088	15.5041	0.269776				1.69	0.835339	1.41138	15.5096	0.100096				1.69	0.0108083	1.40863	15.4794	0.00129512
1.7	2.25981	1.42	15.6044	0.270785				1.7	0.839949	1.42037	15.6085	0.100648				1.7	0.0093778	1.4165	15.5659	0.00112371
1.71	2.27054	1.42762	15.6882	0.272071				1.71	0.847499	1.42738	15.6854	0.101553				1.71	0.0064373	1.42562	15.6662	0.000771359
1.72	2.28334	1.43437	15.7624	0.273604				1.72	0.852505	1.43338	15.7514	0.102153				1.72	0.0073115	1.43525	15.772	0.000876112
1.73	2.29462	1.44125	15.8379	0.274956				1.73	0.854095	1.4415	15.8407	0.102343				1.73	0.0105699	1.44475	15.8764	0.00126655
1.74	2.30304	1.451	15.9451	0.275966				1.74	0.857989	1.45112	15.9464	0.10281				1.74	0.0109672	1.45175	15.9533	0.00131417
1.75	2.31195	1.46138	16.0591	0.277032				1.75	0.86538	1.461	16.0549	0.103695				1.75	0.0085036	1.45875	16.0302	0.00101896
1.76	2.32323	1.47037	16.158	0.278384				1.76	0.871738	1.47	16.1538	0.104457				1.76	0.00762939	1.467	16.1209	0.000914204
1.77	2.33436	1.4775	16.2363	0.279718				1.77	0.874837	1.47625	16.2225	0.104829				1.77	0.00913938	1.47525	16.2115	0.00109514
1.78	2.34342	1.48338	16.3008	0.280803				1.78	0.878413	1.48338	16.3008	0.105257				1.78	0.010093	1.485	16.3187	0.00120941
1.79	2.35168	1.49125	16.3874	0.281794				1.79	0.885407	1.49188	16.3942	0.106095				1.79	0.00913938	1.49425	16.4203	0.00109514
1.8	2.3613	1.50113	16.4959	0.282946				1.8	0.89256	1.50075	16.4918	0.106952				1.8	0.00890096	1.50212	16.5069	0.00106657
1.81	2.37163	1.511	16.6044	0.284184				1.81	0.896136	1.51075	16.6016	0.107381				1.81	0.0105699	1.50975	16.5907	0.00126655
1.82	2.38069	1.51988	16.7019	0.28527				1.82	0.898361	1.51913	16.6937	0.107647				1.82	0.0123978	1.51687	16.669	0.00148558
1.83	2.38927	1.52625	16.772	0.286298				1.83	0.902891	1.52638	16.7734	0.10819				1.83	0.011762	1.52487	16.7569	0.0014094
1.84	2.39857	1.5335	16.8516	0.287412				1.84	0.909408	1.534	16.8571	0.108971				1.84	0.00977516	1.53537	16.8723	0.00117132
1.85	2.40803	1.54188	16.9437	0.288546				1.85	0.914335	1.54163	16.9409	0.109562				1.85	0.0093778	1.54525	16.9808	0.00112371
1.86	2.41621	1.5505	17.0385	0.289526				1.86	0.917673	1.55062	17.0398	0.109962				1.86	0.0103315	1.55313	17.0673	0.00123798
1.87	2.42368	1.5605	17.1484	0.290422				1.87	0.923077	1.561	17.1538	0.110609				1.87	0.00969569	1.55975	17.1401	0.0011618
1.88	2.43274	1.56925	17.2445	0.291507				1.88	0.930866	1.57	17.2527	0.111542				1.88	0.00834465	1.56625	17.2115	0.00099991
1.89	2.44284	1.57675	17.3269	0.292717				1.89	0.935793	1.57737	17.3338	0.112133				1.89	0.00929832	1.57537	17.3118	0.00111419
1.9	2.4515	1.58425	17.4093	0.293755				1.9	0.937621	1.584	17.4066	0.112352				1.9	0.0108083	1.586	17.4286	0.00129512
1.91	2.45905	1.59163	17.4904	0.294659				1.91	0.941594	1.59112	17.4849	0.112828				1.91	0.0103315	1.59525	17.5302	0.00123798
1.92	2.46835	1.60025	17.5852	0.295773				1.92	0.948906	1.60112	17.5948	0.113704				1.92	0.00969569	1.60262	17.6113	0.0011618
1.93	2.47924	1.61075	17.7005	0.297078				1.93	0.954787	1.6115	17.7088	0.114409				1.93	0.0118415	1.6085	17.6758	0.00141892
1.94	2.48829	1.62013	17.8036	0.298164				1.94	0.95741	1.62025	17.8049	0.114723				1.94	0.0140667	1.61625	17.761	0.00168556
1.95	2.49465	1.62775	17.8874	0.298926				1.95	0.961463	1.627	17.8791	0.115209				1.95	0.0125567	1.62563	17.864	0.00150463
1.96	2.50252	1.63437	17.9602	0.299868				1.96	0.968774	1.63312	17.9464	0.116085				1.96	0.00977516	1.63538	17.9712	0.00117132
1.97	2.51341	1.64125	18.0357	0.301173				1.97	0.975291	1.64138	18.0371	0.116866				1.97	0.00993411	1.64488	18.0755	0.00119037
1.98	2.52207	1.65063	18.1387	0.302211				1.98	0.977834	1.65112	18.1442	0.11717				1.98	0.011762	1.65175	18.1511	0.0014094
1.99	2.5262	1.66138	18.2569	0.302706				1.99	0.980616	1.661	18.2527	0.117504				1.99	0.011603	1.65863	18.2266	0.00139035
2	2.53081	1.67037	18.3558	0.303258				2	0.987053	1.66975	18.3489	0.118275				2	0.00993411	1.667	18.3187	0.00119037
2.01	2.53844	1.6775	18.4341	0.304173				2.01	0.995	1.676	18.4176	0.119227				2.01	0.00993411	1.6755	18.4121	0.00119037
2.02	2.54568	1.68338	18.4986	0.305039				2.02	1.00017	1.68312	18.4959	0.119846				2.02	0.011762	1.68512	18.5179	0.0014094
2.03	2.54957	1.69138	18.5865	0.305506				2.03	1.00327	1.69175	18.5907	0.120218				2.03	0.0121593	1.6945	18.6209	0.00145701
2.04	2.55203	1.701	18.6923	0.305801				2.04	1.00843	1.70063	18.6882	0.120837				2.04	0.00953674	1.7025	18.7088	0.00114275
2.05	2.5572	1.71075	18.7995	0.30642				2.05	1.01566	1.71063	18.7981	0.121703				2.05	0.0073115	1.71012	18.7926	0.000876112
2.06	2.56467	1.71988	18.8997	0.307315				2.06	1.02043	1.71938	18.8942	0.122275				2.06	0.0093778	1.71725	18.8709	0.00112371
2.07	2.57039	1.72625	18.9698	0.308001				2.07	1.02218	1.72687	18.9766	0.122484				2.07	0.0128746	1.72513	18.9574	0.00154272
2.08	2.57365	1.7335	19.0495	0.308391				2.08	1.02488	1.73425	19.0577	0.122808				2.08	0.0128746	1.7355	19.0714	0.00154272
2.09	2.57818	1.74188	19.1415	0.308934				2.09	1.03124	1.74175	19.1401	0.12357				2.09	0.0112057	1.74525	19.1786	0.00134274
2.1	2.58557	1.7505	19.2363	0.30982				2.1	1.0376	1.75038	19.2349	0.124332				2.1	0.0125567	1.75325	19.2665	0.00150463
2.11	2.59225	1.7605	19.3462	0.31062				2.11	1.04078	1.76075	19.3489	0.124713				2.11	0.0158946	1.75975	19.3379	0.00190459
2.12	2.59606	1.76937	19.4437	0.311077				2.12	1.04348	1.76988	19.4492	0.125036				2.12	0.0157356	1.76625	19.4093	0.00188555
2.13	2.60027	1.77687	19.5261	0.311581				2.13	1.0492	1.7775	19.533	0.125722				2.13	0.0121593	1.77563	19.5124	0.00145701
2.14	2.60822	1.78438	19.6085	0.312534				2.14	1.05635	1.78412	19.6058	0.126579				2.14	0.0105699	1.786	19.6264	0.00126655
2.15	2.61704	1.79188	19.6909	0.313591				2.15	1.06065	1.79113	19.6827	0.127093				2.15	0.0123978	1.79537	19.7294	0.00148558
2.16	2.62244	1.80025	19.783	0.314238				2.16	1.06279	1.80088	19.7898	0.127351				2.16	0.0130335	1.80288	19.8118	0.00156176
2.17	2.62658	1.81088	19.8997	0.314734				2.17	1.06724	1.81137	19.9052	0.127884				2.17	0.0121593	1.80875	19.8764	0.00145701
2.18	2.63413	1.82012	20.0014	0.315638				2.18	1.07384	1.82038	20.0041	0.128674				2.18	0.0120004	1.81638	19.9602	0.00143797
2.19	2.64303	1.82787	20.0865	0.316705				2.19	1.07876	1.8275	20.0824	0.129265				2.19	0.0128746	1.82575	20.0632	0.00154272
2.2	2.64899	1.8345	20.1593	0.317419				2.2	1.0821	1.83337	20.147	0.129664				2.2	0.0131925	1.8355	20.1703	0.00158081
2.21	2.65352	1.84125	20.2335	0.317962				2.21	1.08647	1.84137	20.2349	0.130188				2.21	0.0123978	1.84488	20.2734	0.00148558
2.22	2.66131	1.85088	20.3393	0.318895				2.22	1.09204	1.85112	20.342	0.130855				2.22	0.0109672	1.85163	20.3475	0.00131417
2.23	2.671	1.8615	20.456	0.320057				2.23	1.09633	1.861	20.4505	0.131369				2.23	0.0107288	1.85875	20.4258	0.0012856
2.24	2.67823	1.8705	20.5549	0.320924				2.24	1.10038	1.86987	20.5481	0.131855				2.24	0.0118415	1.867	20.5165	0.00141892
2.25	2.68372	1.8775	20.6319	0.321581				2.25	1.10666	1.87613	20.6168	0.132607				2.25	0.0123978	1.87538	20.6085	0.00148558
2.26	2.69143	1.88338	20.6964	0.322504				2.26	1.11365	1.88338	20.6964	0.133445				2.26	0.011603	1.88512	20.7157	0.00139035
2.27	2.70081	1.89138	20.7843	0.323628				2.27	1.11794	1.89175	20.7885	0.133959				2.27	0.0118415	1.89425	20.8159	0.00141892
2.28	2.70788	1.90112	20.8915	0.324476				2.28	1.12041	1.90063	20.886	0.134255				2.28	0.0128746	1.90225	20.9038	0.00154272
2.29	2.71304	1.91088	20.9986	0.325095				2.29	1.12446	1.91063	20.9959	0.13474				2.29	0.0122388	1.90975	20.9863	0.00146653
2.3	2.72004	1.92	21.0989	0.325933				2.3	1.1309	1.91912	21.0893	0.135512				2.3	0.0113646	1.917	21.0659	0.00136178
2.31	2.72926	1.92637	21.169	0.327037				2.31	1.13662	1.92663	21.1717	0.136197				2.31	0.0126362	1.92512	21.1552	0.00151415
2.32	2.73744	1.93338	21.2459	0.328018				2.32	1.13996	1.93413	21.2541	0.136597				2.32	0.0142256	1.93562	21.2706	0.00170461
2.33	2.74269	1.94188	21.3393	0.328647				2.33	1.14385	1.94162	21.3365	0.137064				2.33	0.0131925	1.94512	21.375	0.00158081
2.34	2.74865	1.95063	21.4354	0.329361				2.34	1.15021	1.9505	21.4341	0.137826				2.34	0.0112057	1.95312	21.4629	0.00134274
2.35	2.75787	1.96063	21.5453	0.330466				2.35	1.15577	1.96087	21.5481	0.138492				2.35	0.0125567	1.95962	21.5343	0.00150463
2.36	2.76748	1.96938	21.6415	0.331618				2.36	1.15744	1.96988	21.647	0.138692				2.36	0.0152588	1.96625	21.6071	0.00182841
2.37	2.77416	1.977	21.7253	0.332418				2.37	1.15864	1.9775	21.7308	0.138835				2.37	0.0149409	1.97562	21.7102	0.00179032
2.38	2.78012	1.9845	21.8077	0.333132				2.38	1.16404	1.98412	21.8036	0.139483				2.38	0.0125567	1.986	21.8242	0.00150463
2.39	2.78918	1.99188	21.8887	0.334218				2.39	1.17159	1.99125	21.8819	0.140387				2.39	0.011762	1.99537	21.9272	0.0014094
2.4	2.79967	2.00025	21.9808	0.335475				2.4	1.17572	2.00113	21.9904	0.140883				2.4	0.0135899	2.00275	22.0082	0.00162843
2.41	2.80642	2.01075	22.0962	0.336284				2.41	1.17763	2.0115	22.1044	0.141111				2.41	0.0152588	2.00862	22.0728	0.00182841
2.42	2.81095	2.02013	22.1992	0.336827				2.42	1.18248	2.02038	22.2019	0.141692				2.42	0.0144641	2.01638	22.158	0.00173318
2.43	2.81819	2.02775	22.283	0.337693				2.43	1.18995	2.02725	22.2775	0.142587				2.43	0.0122388	2.02588	22.2624	0.00146653
2.44	2.82804	2.03437	22.3558	0.338874				2.44	1.19567	2.03325	22.3434	0.143273				2.44	0.0128746	2.0355	22.3681	0.00154272
2.45	2.83631	2.04125	22.4313	0.339865				2.45	1.19821	2.04137	22.4327	0.143578				2.45	0.0154972	2.04488	22.4712	0.00185698
2.46	2.84219	2.05088	22.5371	0.340569				2.46	1.20147	2.05125	22.5412	0.143968				2.46	0.0156562	2.05163	22.5453	0.00187602
2.47	2.84886	2.06137	22.6525	0.341369				2.47	1.20759	2.06113	22.6497	0.144701				2.47	0.013272	2.059	22.6264	0.00159033
2.48	2.85784	2.0705	22.7527	0.342445				2.48	1.21323	2.06988	22.7459	0.145377				2.48	0.0136693	2.06725	22.717	0.00163795
2.49	2.86667	2.07762	22.831	0.343503				2.49	1.21665	2.07625	22.8159	0.145787				2.49	0.0166893	2.07563	22.8091	0.00199982
2.5	2.8739	2.08338	22.8942	0.344369				2.5	1.22062	2.0835	22.8956	0.146263				2.5	0.0175635	2.08525	22.9148	0.00210457
2.51	2.88129	2.09138	22.9821	0.345255				2.51	1.22698	2.09187	22.9876	0.147025				2.51	0.016133	2.09463	23.0179	0.00193316
2.52	2.89019	2.101	23.0879	0.346321				2.52	1.23294	2.10075	23.0852	0.147739				2.52	0.0158946	2.1025	23.1044	0.00190459
2.53	2.89885	2.11088	23.1964	0.347359				2.53	1.23588	2.11075	23.1951	0.148091				2.53	0.0173251	2.10988	23.1854	0.002076
2.54	2.90521	2.11987	23.2953	0.348121				2.54	1.2389	2.11925	23.2885	0.148453				2.54	0.0184377	2.117	23.2637	0.00220932
2.55	2.91053	2.12637	23.3668	0.348759				2.55	1.24446	2.1265	23.3681	0.14912				2.55	0.0181198	2.12513	23.353	0.00217123
2.56	2.91697	2.1335	23.4451	0.349531				2.56	1.25027	2.13413	23.4519	0.149815				2.56	0.0174046	2.13575	23.4698	0.00208553
2.57	2.92476	2.14175	23.5357	0.350464				2.57	1.25392	2.14175	23.5357	0.150253				2.57	0.0175635	2.14562	23.5783	0.00210457
2.58	2.93199	2.1505	23.6319	0.35133				2.58	1.25766	2.1505	23.6319	0.150701				2.58	0.0175635	2.15338	23.6635	0.00210457
2.59	2.93938	2.1605	23.7418	0.352216				2.59	1.26378	2.161	23.7473	0.151434				2.59	0.0167688	2.15987	23.7349	0.00200934
2.6	2.94797	2.16938	23.8393	0.353244				2.6	1.26998	2.17025	23.8489	0.152177				2.6	0.0162919	2.16637	23.8063	0.00195221
2.61	2.95583	2.17687	23.9217	0.354187				2.61	1.27355	2.17775	23.9313	0.152605				2.61	0.0163714	2.17563	23.908	0.00196173
2.62	2.96156	2.1845	24.0055	0.354873				2.62	1.27618	2.18438	24.0041	0.15292				2.62	0.0163714	2.18625	24.0247	0.00196173
2.63	2.96752	2.19188	24.0865	0.355587				2.63	1.28158	2.19125	24.0797	0.153567				2.63	0.016133	2.1955	24.1264	0.00193316
2.64	2.97602	2.20038	24.1799	0.356606				2.64	1.28857	2.201	24.1868	0.154405				2.64	0.0158946	2.20275	24.206	0.00190459
2.65	2.98508	2.21088	24.2953	0.357692				2.65	1.29223	2.2115	24.3022	0.154843				2.65	0.0165304	2.2085	24.2692	0.00198078
2.66	2.99207	2.22	24.3956	0.35853				2.66	1.2931	2.22038	24.3997	0.154948				2.66	0.0169277	2.21638	24.3558	0.00202839
2.67	2.99788	2.22775	24.4808	0.359225				2.67	1.29763	2.22725	24.4753	0.155491				2.67	0.0158946	2.22575	24.4588	0.00190459
2.68	3.00566	2.23438	24.5536	0.360158				2.68	1.30645	2.23325	24.5412	0.156548				2.68	0.0144641	2.2355	24.5659	0.00173318
2.69	3.01512	2.24112	24.6277	0.361291				2.69	1.31305	2.24138	24.6305	0.157338				2.69	0.0153383	2.24475	24.6676	0.00183793
2.7	3.02251	2.25088	24.7349	0.362177				2.7	1.31512	2.25113	24.7376	0.157586				2.7	0.0179609	2.25113	24.7376	0.00215219
2.71	3.02744	2.2615	24.8516	0.362767				2.71	1.31774	2.26087	24.8448	0.1579				2.71	0.0177225	2.25838	24.8173	0.00212362
2.72	3.03316	2.2705	24.9505	0.363453				2.72	1.32386	2.26975	24.9423	0.158633				2.72	0.0148614	2.26688	24.9107	0.00178079
2.73	3.04127	2.27763	25.0288	0.364424				2.73	1.33006	2.27612	25.0124	0.159376				2.73	0.0150998	2.27537	25.0041	0.00180936
2.74	3.04961	2.2835	25.0934	0.365424				2.74	1.3334	2.28325	25.0907	0.159776				2.74	0.0188351	2.28525	25.1126	0.00225694
2.75	3.05502	2.29137	25.1799	0.366072				2.75	1.33586	2.29175	25.1841	0.160071				2.75	0.0200272	2.29425	25.2115	0.00239978
2.76	3.05955	2.30112	25.2871	0.366615				2.76	1.34095	2.30063	25.2816	0.160681				2.76	0.0171661	2.30187	25.2953	0.00205696
2.77	3.06694	2.311	25.3956	0.3675				2.77	1.34802	2.31075	25.3929	0.161528				2.77	0.0163714	2.30963	25.3805	0.00196173
2.78	3.07576	2.32	25.4945	0.368557				2.78	1.35279	2.31913	25.4849	0.1621				2.78	0.0196298	2.31675	25.4588	0.00235217
2.79	3.08236	2.3265	25.5659	0.369348				2.79	1.35438	2.32638	25.5646	0.16229				2.79	0.0210603	2.325	25.5495	0.00252358
2.8	3.08752	2.33375	25.6456	0.369967				2.8	1.35724	2.33412	25.6497	0.162633				2.8	0.0177225	2.3355	25.6648	0.00212362
2.81	3.09499	2.34187	25.7349	0.370862				2.81	1.36359	2.34175	25.7335	0.163395				2.81	0.0143051	2.34512	25.7706	0.00171413
2.82	3.10461	2.3505	25.8297	0.372014				2.82	1.36924	2.35062	25.831	0.164071				2.82	0.0149409	2.35275	25.8544	0.00179032
2.83	3.11279	2.3605	25.9396	0.372995				2.83	1.3717	2.36088	25.9437	0.164366				2.83	0.0170867	2.35938	25.9272	0.00204743
2.84	3.11883	2.36937	26.0371	0.373719				2.84	1.37512	2.37	26.044	0.164776				2.84	0.0173251	2.366	26	0.002076
2.85	3.12559	2.37675	26.1181	0.374528				2.85	1.38172	2.37737	26.125	0.165566				2.85	0.0158946	2.37538	26.103	0.00190459
2.86	3.13361	2.38437	26.2019	0.37549				2.86	1.38768	2.384	26.1978	0.16628				2.86	0.0156562	2.38612	26.2212	0.00187602
2.87	3.14101	2.39188	26.2843	0.376376				2.87	1.38998	2.39113	26.2761	0.166556				2.87	0.0170867	2.39538	26.3228	0.00204743
2.88	3.14705	2.40013	26.375	0.377099				2.88	1.39181	2.40112	26.386	0.166775				2.88	0.0181993	2.4025	26.4011	0.00218076
2.89	3.1542	2.41075	26.4918	0.377956				2.89	1.39697	2.4115	26.5	0.167394				2.89	0.0178019	2.40825	26.4643	0.00213314
2.9	3.16262	2.42025	26.5962	0.378966				2.9	1.40333	2.42037	26.5975	0.168156				2.9	0.0178019	2.41637	26.5536	0.00213314
2.91	3.17049	2.428	26.6813	0.379909				2.91	1.40762	2.427	26.6703	0.168671				2.91	0.0193914	2.42575	26.6566	0.0023236
2.92	3.17709	2.4345	26.7527	0.380699				2.92	1.4112	2.433	26.7363	0.169099				2.92	0.0201861	2.4355	26.7637	0.00241883
2.93	3.18448	2.44112	26.8255	0.381585				2.93	1.41629	2.44137	26.8283	0.169709				2.93	0.0187556	2.44488	26.8668	0.00224742
2.94	3.19266	2.45063	26.9299	0.382566				2.94	1.42161	2.45125	26.9368	0.170347				2.94	0.0175635	2.4515	26.9396	0.00210457
2.95	3.19926	2.46125	27.0467	0.383356				2.95	1.42495	2.46113	27.0453	0.170747				2.95	0.0187556	2.45863	27.0179	0.00224742
2.96	3.20419	2.47025	27.1456	0.383946				2.96	1.42725	2.46975	27.1401	0.171023				2.96	0.0185966	2.467	27.1099	0.00222837
2.97	3.21078	2.47737	27.2239	0.384737				2.97	1.4317	2.476	27.2088	0.171556				2.97	0.0163714	2.47538	27.2019	0.00196173
2.98	3.22008	2.48338	27.2898	0.385851				2.98	1.43751	2.483	27.2857	0.172251				2.98	0.016133	2.48525	27.3104	0.00193316
2.99	3.22874	2.49138	27.3777	0.386889				2.99	1.44164	2.49162	27.3805	0.172746				2.99	0.019153	2.49437	27.4107	0.00229503
3	3.23407	2.50088	27.4821	0.387527				3	1.44426	2.50075	27.4808	0.173061				3	0.0204245	2.50225	27.4973	0.0024474
3.01	3.23915	2.51075	27.5907	0.388137				3.01	1.44903	2.51075	27.5907	0.173632				3.01	0.0185966	2.50975	27.5797	0.00222837
3.02	3.24742	2.51987	27.6909	0.389127				3.02	1.45562	2.519	27.6813	0.174422				3.02	0.0177225	2.517	27.6593	0.00212362
3.03	3.25727	2.52637	27.7624	0.390308				3.03	1.45992	2.5265	27.7637	0.174937				3.03	0.0197887	2.52513	27.7486	0.00237122
3.04	3.26467	2.53337	27.8393	0.391193				3.04	1.46182	2.53412	27.8475	0.175165				3.04	0.0214577	2.53563	27.864	0.0025712
3.05	3.26927	2.54175	27.9313	0.391746				3.05	1.46627	2.54175	27.9313	0.175698				3.05	0.0198682	2.54525	27.9698	0.00238074
3.06	3.27627	2.5505	28.0275	0.392584				3.06	1.47327	2.5505	28.0275	0.176537				3.06	0.0174046	2.553	28.0549	0.00208553
3.07	3.28612	2.5605	28.1374	0.393765				3.07	1.47843	2.56087	28.1415	0.177156				3.07	0.0178019	2.55963	28.1277	0.00213314
3.08	3.29359	2.56925	28.2335	0.39466				3.08	1.48034	2.57	28.2418	0.177384				3.08	0.0204245	2.56625	28.2005	0.0024474
3.09	3.29781	2.57675	28.3159	0.395165				3.09	1.4832	2.57737	28.3228	0.177727				3.09	0.0205835	2.57563	28.3036	0.00246644
3.1	3.30337	2.58438	28.3997	0.395831				3.1	1.48972	2.584	28.3956	0.178508				3.1	0.0173251	2.58625	28.4203	0.002076
3.11	3.31283	2.59175	28.4808	0.396964				3.11	1.49639	2.59112	28.4739	0.179308				3.11	0.0158946	2.59538	28.5206	0.00190459
3.12	3.32157	2.60012	28.5728	0.398012				3.12	1.49949	2.601	28.5824	0.179679				3.12	0.0188351	2.60263	28.6003	0.00225694
3.13	3.32626	2.61075	28.6896	0.398574				3.13	1.50172	2.61137	28.6964	0.179946				3.13	0.0212192	2.60838	28.6635	0.00254263
3.14	3.33055	2.62	28.7912	0.399088				3.14	1.50712	2.62012	28.7926	0.180593				3.14	0.018994	2.61638	28.7514	0.00227599
3.15	3.33762	2.62775	28.8764	0.399936				3.15	1.51428	2.62712	28.8695	0.18145				3.15	0.0166893	2.62588	28.8558	0.00199982
3.16	3.34581	2.63437	28.9492	0.400916				3.16	1.51833	2.63313	28.9354	0.181936				3.16	0.0187556	2.63563	28.9629	0.00224742
3.17	3.35161	2.64113	29.0234	0.401612				3.17	1.5192	2.64125	29.0247	0.182041				3.17	0.0216166	2.64487	29.0646	0.00259024
3.18	3.35654	2.65088	29.1305	0.402202				3.18	1.5223	2.651	29.1319	0.182412				3.18	0.0202656	2.65137	29.136	0.00242835
3.19	3.36377	2.6615	29.2473	0.403069				3.19	1.5289	2.661	29.2418	0.183203				3.19	0.0178019	2.65875	29.217	0.00213314
3.2	3.37195	2.6705	29.3462	0.404049				3.2	1.53438	2.66975	29.3379	0.18386				3.2	0.0188351	2.667	29.3077	0.00225694
3.21	3.37768	2.67762	29.4245	0.404735				3.21	1.53748	2.676	29.4066	0.184231				3.21	0.0214577	2.6755	29.4011	0.0025712
3.22	3.38181	2.6835	29.489	0.40523				3.22	1.54122	2.68325	29.4863	0.184679				3.22	0.0216166	2.68525	29.5082	0.00259024
3.23	3.38817	2.6915	29.5769	0.405992				3.23	1.54694	2.69175	29.5797	0.185364				3.23	0.0197887	2.69437	29.6085	0.00237122
3.24	3.3958	2.701	29.6813	0.406906				3.24	1.55171	2.70075	29.6786	0.185936				3.24	0.018994	2.70213	29.6937	0.00227599
3.25	3.4016	2.71088	29.7898	0.407601				3.25	1.55465	2.71062	29.7871	0.186288				3.25	0.0193914	2.70962	29.7761	0.0023236
3.26	3.40613	2.72	29.8901	0.408144				3.26	1.5583	2.719	29.8791	0.186726				3.26	0.0197887	2.71687	29.8558	0.00237122
3.27	3.41312	2.7265	29.9615	0.408982				3.27	1.56331	2.7265	29.9615	0.187326				3.27	0.0202656	2.725	29.9451	0.00242835
3.28	3.42234	2.7335	30.0385	0.410087				3.28	1.56776	2.73413	30.0453	0.187859				3.28	0.0212192	2.7355	30.0604	0.00254263
3.29	3.42973	2.74187	30.1305	0.410973				3.29	1.5703	2.74162	30.1277	0.188164				3.29	0.0216961	2.74512	30.1662	0.00259977
3.3	3.43426	2.75062	30.2266	0.411515				3.3	1.57372	2.7505	30.2253	0.188574				3.3	0.0208219	2.75312	30.2541	0.00249501
3.31	3.43967	2.7605	30.3352	0.412163				3.31	1.57944	2.76087	30.3393	0.189259				3.31	0.0194709	2.75963	30.3255	0.00233312
3.32	3.44769	2.76925	30.4313	0.413125				3.32	1.58509	2.76975	30.4368	0.189935				3.32	0.0194709	2.76613	30.397	0.00233312
3.33	3.45532	2.77687	30.5151	0.414039				3.33	1.58795	2.7775	30.522	0.190278				3.33	0.0206629	2.7755	30.5	0.00247597
3.34	3.46017	2.7845	30.5989	0.41462				3.34	1.59057	2.78412	30.5948	0.190592				3.34	0.0204245	2.786	30.6154	0.0024474
3.35	3.46573	2.79188	30.6799	0.415287				3.35	1.59621	2.79125	30.6731	0.191268				3.35	0.0184377	2.79537	30.7184	0.00220932
3.36	3.474	2.80025	30.772	0.416277				3.36	1.60241	2.80112	30.7816	0.192011				3.36	0.0179609	2.80275	30.7995	0.00215219
3.37	3.48179	2.81075	30.8874	0.41721				3.37	1.60543	2.8115	30.8956	0.192373				3.37	0.0201861	2.80863	30.864	0.00241883
3.38	3.48616	2.82012	30.9904	0.417734				3.38	1.60726	2.82037	30.9931	0.192592				3.38	0.0209014	2.81637	30.9492	0.00250454
3.39	3.48942	2.82775	31.0742	0.418124				3.39	1.61266	2.82725	31.0687	0.19324				3.39	0.0183582	2.82587	31.0536	0.0021998
3.4	3.49522	2.83425	31.1456	0.418819				3.4	1.6199	2.83325	31.1346	0.194106				3.4	0.0171661	2.8355	31.1593	0.00205696
3.41	3.50285	2.84112	31.2212	0.419734				3.41	1.62371	2.84138	31.2239	0.194563				3.41	0.0202656	2.84475	31.261	0.00242835
3.42	3.50881	2.85075	31.3269	0.420448				3.42	1.62474	2.85137	31.3338	0.194687				3.42	0.0228882	2.8515	31.3352	0.00274261
3.43	3.51349	2.86125	31.4423	0.42101				3.43	1.62824	2.86125	31.4423	0.195106				3.43	0.0209014	2.85875	31.4148	0.00250454
3.44	3.51985	2.87038	31.5426	0.421772				3.44	1.63444	2.86975	31.5357	0.195849				3.44	0.0183582	2.86687	31.5041	0.0021998
3.45	3.5282	2.87737	31.6195	0.422772				3.45	1.63897	2.876	31.6044	0.196392				3.45	0.0193914	2.87538	31.5975	0.0023236
3.46	3.53519	2.88325	31.6841	0.42361				3.46	1.64064	2.88338	31.6854	0.196592				3.46	0.0219345	2.88525	31.706	0.00262834
3.47	3.53901	2.89125	31.772	0.424067				3.47	1.64366	2.89175	31.7775	0.196954				3.47	0.0219345	2.89438	31.8063	0.00262834
3.48	3.54298	2.901	31.8791	0.424543				3.48	1.6497	2.90075	31.8764	0.197678				3.48	0.0198682	2.902	31.8901	0.00238074
3.49	3.55093	2.91087	31.9876	0.425495				3.49	1.65518	2.91075	31.9863	0.198335				3.49	0.0192324	2.9095	31.9725	0.00230455
3.5	3.56022	2.91988	32.0865	0.426609				3.5	1.65709	2.91913	32.0783	0.198563				3.5	0.0214577	2.91675	32.0522	0.0025712
3.51	3.56619	2.92625	32.1566	0.427324				3.51	1.65868	2.9265	32.1593	0.198754				3.51	0.0232855	2.92512	32.1442	0.00279023
3.52	3.57008	2.93363	32.2376	0.42779				3.52	1.66384	2.93412	32.2431	0.199373				3.52	0.0216961	2.93562	32.2596	0.00259977
3.53	3.57644	2.94188	32.3283	0.428552				3.53	1.67028	2.94163	32.3255	0.200144				3.53	0.0200272	2.94525	32.3654	0.00239978
3.54	3.58454	2.95063	32.4245	0.429523				3.54	1.6737	2.9505	32.4231	0.200553				3.54	0.0209014	2.95325	32.4533	0.00250454
3.55	3.59027	2.96037	32.5316	0.430209				3.55	1.67521	2.961	32.5385	0.200734				3.55	0.0223319	2.95987	32.5261	0.00267595
3.56	3.5944	2.96913	32.6277	0.430704				3.56	1.67958	2.97012	32.6387	0.201258				3.56	0.0214577	2.96625	32.5962	0.0025712
3.57	3.6006	2.97675	32.7115	0.431447				3.57	1.68657	2.9775	32.7198	0.202096				3.57	0.0205835	2.9755	32.6978	0.00246644
3.58	3.60815	2.98425	32.794	0.432352				3.58	1.69102	2.98413	32.7926	0.202629				3.58	0.0222524	2.98612	32.8146	0.00266643
3.59	3.61419	2.99175	32.8764	0.433075				3.59	1.69182	2.99125	32.8709	0.202725				3.59	0.0243187	2.99538	32.9162	0.00291402
3.6	3.61872	3.00025	32.9698	0.433618				3.6	1.69412	3.001	32.978	0.203001				3.6	0.023524	3.0025	32.9945	0.00281879
3.61	3.62388	3.01063	33.0838	0.434237				3.61	1.70048	3.01138	33.092	0.203763				3.61	0.0224908	3.0085	33.0604	0.002695
3.62	3.63056	3.01987	33.1854	0.435037				3.62	1.70589	3.02013	33.1882	0.20441				3.62	0.0240008	3.01638	33.147	0.00287593
3.63	3.637	3.02763	33.2706	0.435808				3.63	1.70787	3.027	33.2637	0.204648				3.63	0.0253518	3.02575	33.25	0.00303782
3.64	3.64311	3.03425	33.3434	0.436542				3.64	1.71057	3.03313	33.331	0.204972				3.64	0.0237624	3.03538	33.3558	0.00284736
3.65	3.65019	3.04113	33.419	0.437389				3.65	1.71661	3.04137	33.4217	0.205696				3.65	0.0220935	3.04475	33.4588	0.00264738
3.66	3.65798	3.05088	33.5261	0.438323				3.66	1.72218	3.05112	33.5288	0.206362				3.66	0.0231266	3.0515	33.533	0.00277118
3.67	3.66481	3.06137	33.6415	0.439141				3.67	1.72432	3.061	33.6374	0.20662				3.67	0.0239213	3.05875	33.6126	0.00286641
3.68	3.67014	3.07037	33.7404	0.43978				3.68	1.72639	3.06975	33.7335	0.206867				3.68	0.0223319	3.067	33.7033	0.00267595
3.69	3.6757	3.0775	33.8187	0.440446				3.69	1.73195	3.076	33.8022	0.207534				3.69	0.0210603	3.07538	33.7953	0.00252358
3.7	3.68269	3.08338	33.8832	0.441284				3.7	1.73799	3.08338	33.8832	0.208257				3.7	0.0222524	3.08513	33.9025	0.00266643
3.71	3.68905	3.09125	33.9698	0.442046				3.71	1.74101	3.09187	33.9766	0.208619				3.71	0.0239213	3.09437	34.0041	0.00286641
3.72	3.69294	3.101	34.0769	0.442513				3.72	1.74212	3.10075	34.0742	0.208753				3.72	0.023524	3.10225	34.0907	0.00281879
3.73	3.69644	3.11088	34.1854	0.442932				3.73	1.74594	3.11075	34.1841	0.20921				3.73	0.0216166	3.10975	34.1731	0.00259024
3.74	3.7024	3.11975	34.283	0.443646				3.74	1.75198	3.119	34.2747	0.209933				3.74	0.021855	3.11675	34.25	0.00261881
3.75	3.7094	3.12625	34.3544	0.444484				3.75	1.75611	3.1265	34.3571	0.210429				3.75	0.0249545	3.12487	34.3393	0.00299021
3.76	3.71416	3.1335	34.4341	0.445055				3.76	1.75714	3.134	34.4396	0.210553				3.76	0.0270208	3.1355	34.456	0.0032378
3.77	3.71806	3.14188	34.5261	0.445522				3.77	1.76024	3.14162	34.5234	0.210924				3.77	0.0245571	3.14513	34.5618	0.00294259
3.78	3.72465	3.1505	34.6209	0.446312				3.78	1.76716	3.15037	34.6195	0.211752				3.78	0.0212192	3.153	34.6484	0.00254263
3.79	3.73252	3.16038	34.7294	0.447255				3.79	1.77216	3.16075	34.7335	0.212352				3.79	0.0227292	3.1595	34.7198	0.00272357
3.8	3.73824	3.16925	34.8269	0.447941				3.8	1.7732	3.16988	34.8338	0.212476				3.8	0.0271797	3.16613	34.7926	0.00325685
3.81	3.74214	3.17687	34.9107	0.448407				3.81	1.77479	3.17725	34.9148	0.212667				3.81	0.0266234	3.17563	34.897	0.00319019
3.82	3.74786	3.1845	34.9945	0.449093				3.82	1.78019	3.184	34.989	0.213314				3.82	0.0228882	3.18613	35.0124	0.00274261
3.83	3.75573	3.19188	35.0755	0.450036				3.83	1.78575	3.19112	35.0673	0.213981				3.83	0.023524	3.1955	35.1154	0.00281879
3.84	3.76233	3.20025	35.1676	0.450826				3.84	1.78774	3.201	35.1758	0.214219				3.84	0.0272592	3.20275	35.1951	0.00326637
3.85	3.7663	3.21075	35.283	0.451302				3.85	1.78886	3.21137	35.2898	0.214352				3.85	0.0268618	3.20863	35.2596	0.00321876
3.86	3.77115	3.22012	35.386	0.451883				3.86	1.79307	3.22025	35.3874	0.214857				3.86	0.0237624	3.21663	35.3475	0.00284736
3.87	3.77822	3.228	35.4725	0.452731				3.87	1.79903	3.22713	35.4629	0.215571				3.87	0.0240008	3.226	35.4505	0.00287593
3.88	3.78553	3.2345	35.544	0.453607				3.88	1.80284	3.23312	35.5288	0.216028				3.88	0.0276566	3.23575	35.5577	0.00331399
3.89	3.79094	3.24125	35.6181	0.454254				3.89	1.80467	3.24138	35.6195	0.216247				3.89	0.0293255	3.245	35.6593	0.00351397
3.9	3.79547	3.25062	35.7212	0.454797				3.9	1.80841	3.25113	35.7266	0.216695				3.9	0.0278155	3.25175	35.7335	0.00333303
3.91	3.80127	3.26125	35.8379	0.455492				3.91	1.81468	3.261	35.8352	0.217447				3.91	0.0257492	3.25875	35.8104	0.00308544
3.92	3.80755	3.27038	35.9382	0.456245				3.92	1.81945	3.26975	35.9313	0.218019				3.92	0.0253518	3.26713	35.9025	0.00303782
3.93	3.81231	3.27763	36.0179	0.456816				3.93	1.82215	3.276	36	0.218342				3.93	0.0264645	3.27562	35.9959	0.00317114
3.94	3.81708	3.28337	36.081	0.457387				3.94	1.82581	3.28313	36.0783	0.21878				3.94	0.0268618	3.28538	36.103	0.00321876
3.95	3.82368	3.29137	36.169	0.458178				3.95	1.83082	3.29175	36.1731	0.21938				3.95	0.0261466	3.2945	36.2033	0.00313305
3.96	3.83027	3.301	36.2747	0.458968				3.96	1.83487	3.30063	36.2706	0.219866				3.96	0.026385	3.30238	36.2898	0.00316162
3.97	3.83433	3.31087	36.3832	0.459454				3.97	1.83741	3.3105	36.3791	0.220171				3.97	0.0274181	3.30987	36.3723	0.00328542
3.98	3.83687	3.31988	36.4821	0.459759				3.98	1.84067	3.31925	36.4753	0.220561				3.98	0.0267823	3.31712	36.4519	0.00320924
3.99	3.84172	3.32638	36.5536	0.46034				3.99	1.84472	3.32675	36.5577	0.221047				3.99	0.0251929	3.32525	36.5412	0.00301878
4	3.84855	3.3335	36.6319	0.461159				4	1.84719	3.33425	36.6401	0.221342				4	0.0254313	3.33575	36.6566	0.00304734
4.01	3.85372	3.34187	36.7239	0.461778				4.01	1.84894	3.34175	36.7225	0.221552				4.01	0.0267823	3.34525	36.761	0.00320924
4.02	3.85761	3.35062	36.8201	0.462244				4.02	1.85243	3.35038	36.8173	0.221971				4.02	0.0264645	3.353	36.8462	0.00317114
4.03	3.86302	3.36063	36.9299	0.462892				4.03	1.858	3.36088	36.9327	0.222637				4.03	0.0249545	3.3595	36.9176	0.00299021
4.04	3.87073	3.36925	37.0247	0.463816				4.04	1.86245	3.36987	37.0316	0.22317				4.04	0.0251134	3.36625	36.9918	0.00300925
4.05	3.87637	3.37675	37.1071	0.464492				4.05	1.86427	3.37737	37.114	0.223389				4.05	0.0261466	3.37562	37.0948	0.00313305
4.06	3.87947	3.38437	37.1909	0.464863				4.06	1.86642	3.384	37.1868	0.223647				4.06	0.0255903	3.38612	37.2102	0.00306639
4.07	3.88392	3.39188	37.2734	0.465396				4.07	1.87151	3.39113	37.2651	0.224256				4.07	0.0247161	3.39538	37.3118	0.00296164
4.08	3.89195	3.40037	37.3668	0.466358				4.08	1.87683	3.40088	37.3723	0.224894				4.08	0.026385	3.4025	37.3901	0.00316162
4.09	3.89957	3.41087	37.4821	0.467272				4.09	1.87898	3.41138	37.4876	0.225151				4.09	0.029246	3.40837	37.4547	0.00350445
4.1	3.90371	3.42013	37.5838	0.467768				4.1	1.88072	3.42037	37.5865	0.225361				4.1	0.029246	3.41625	37.5412	0.00350445
4.11	3.90681	3.42787	37.669	0.468139				4.11	1.88573	3.4275	37.6648	0.225961				4.11	0.0270208	3.42588	37.647	0.0032378
4.12	3.91301	3.4345	37.7418	0.468882				4.12	1.89225	3.43337	37.7294	0.226742				4.12	0.0271797	3.43562	37.7541	0.00325685
4.13	3.92063	3.44125	37.8159	0.469796				4.13	1.89503	3.4415	37.8187	0.227075				4.13	0.0290871	3.44488	37.8558	0.0034854
4.14	3.92548	3.45087	37.9217	0.470377				4.14	1.89543	3.45125	37.9258	0.227122				4.14	0.0290871	3.4515	37.9286	0.0034854
4.15	3.92882	3.46137	38.0371	0.470777				4.15	1.89869	3.46113	38.0343	0.227513				4.15	0.0266234	3.45875	38.0082	0.00319019
4.16	3.93478	3.47038	38.136	0.471491				4.16	1.90488	3.47	38.1319	0.228256				4.16	0.0251134	3.467	38.0989	0.00300925
4.17	3.94257	3.4775	38.2143	0.472424				4.17	1.90934	3.47613	38.1992	0.228789				4.17	0.0264645	3.47538	38.1909	0.00317114
4.18	3.94837	3.48325	38.2775	0.473119				4.18	1.91021	3.48338	38.2788	0.228894				4.18	0.0286897	3.48513	38.2981	0.00343779
4.19	3.95187	3.49138	38.3668	0.473538				4.19	1.91188	3.49175	38.3709	0.229094				4.19	0.0288486	3.49412	38.397	0.00345683
4.2	3.95624	3.501	38.4725	0.474062				4.2	1.91736	3.50088	38.4712	0.229751				4.2	0.0270208	3.50188	38.4821	0.0032378
4.21	3.96299	3.51075	38.5797	0.474872				4.21	1.92316	3.51075	38.5797	0.230446				4.21	0.0268618	3.5095	38.5659	0.00321876
4.22	3.9688	3.51987	38.6799	0.475567				4.22	1.92507	3.519	38.6703	0.230675				4.22	0.0294844	3.51675	38.6456	0.00353302
4.23	3.97221	3.52637	38.7514	0.475976				4.23	1.92587	3.5265	38.7527	0.23077				4.23	0.0303586	3.525	38.7363	0.00363777
4.24	3.97547	3.53337	38.8283	0.476367				4.24	1.93016	3.53412	38.8365	0.231284				4.24	0.0278155	3.53563	38.853	0.00333303
4.25	3.98143	3.54188	38.9217	0.477081				4.25	1.93612	3.54175	38.9203	0.231998				4.25	0.026385	3.545	38.956	0.00316162
4.26	3.98834	3.5505	39.0165	0.477909				4.26	1.93866	3.55063	39.0179	0.232303				4.26	0.0282129	3.553	39.044	0.00338065
4.27	3.99359	3.56038	39.125	0.478538				4.27	1.93882	3.561	39.1319	0.232322				4.27	0.029246	3.5595	39.1154	0.00350445
4.28	3.99812	3.56937	39.2239	0.479081				4.28	1.94152	3.56988	39.2294	0.232646				4.28	0.027895	3.56625	39.1896	0.00334256
4.29	4.00432	3.577	39.3077	0.479824				4.29	1.94701	3.57737	39.3118	0.233303				4.29	0.0272592	3.57563	39.2926	0.00326637
4.3	4.01092	3.5845	39.3901	0.480614				4.3	1.95098	3.58412	39.386	0.233779				4.3	0.0280539	3.58613	39.408	0.0033616
4.31	4.01592	3.59187	39.4712	0.481214				4.31	1.95297	3.59125	39.4643	0.234017				4.31	0.0278155	3.59538	39.5096	0.00333303
4.32	4.02077	3.60012	39.5618	0.481795				4.32	1.95607	3.60113	39.5728	0.234389				4.32	0.0267823	3.60275	39.5907	0.00320924
4.33	4.02697	3.6105	39.6758	0.482538				4.33	1.96083	3.61163	39.6882	0.23496				4.33	0.0274181	3.6085	39.6538	0.00328542
4.34	4.03357	3.61987	39.7788	0.483328				4.34	1.96417	3.62025	39.783	0.23536				4.34	0.0288486	3.61625	39.739	0.00345683
4.35	4.03833	3.62775	39.8654	0.483899				4.35	1.96616	3.627	39.8571	0.235598				4.35	0.0293255	3.62588	39.8448	0.00351397
4.36	4.04263	3.63437	39.9382	0.484414				4.36	1.96942	3.633	39.9231	0.235988				4.36	0.0288486	3.63575	39.9533	0.00345683
4.37	4.04882	3.64113	40.0124	0.485156				4.37	1.97395	3.64125	40.0137	0.236531				4.37	0.0284513	3.64487	40.0536	0.00340922
4.38	4.05598	3.65062	40.1168	0.486013				4.38	1.97728	3.65125	40.1236	0.236931				4.38	0.0294844	3.65163	40.1277	0.00353302
4.39	4.06114	3.66125	40.2335	0.486632				4.39	1.97872	3.66113	40.2321	0.237102				4.39	0.0309149	3.65888	40.2074	0.00370443
4.4	4.06551	3.6705	40.3352	0.487156				4.4	1.98062	3.66975	40.3269	0.237331				4.4	0.0297228	3.66712	40.2981	0.00356158
4.41	4.07219	3.67775	40.4148	0.487956				4.41	1.98515	3.676	40.3956	0.237874				4.41	0.0274976	3.6755	40.3901	0.00329494
4.42	4.0803	3.68363	40.4794	0.488928				4.42	1.9896	3.68337	40.4766	0.238407				4.42	0.0286897	3.68525	40.4973	0.00343779
4.43	4.08586	3.69137	40.5646	0.489594				4.43	1.99151	3.69175	40.5687	0.238636				4.43	0.0317097	3.6945	40.5989	0.00379966
4.44	4.08848	3.701	40.6703	0.489908				4.44	1.9935	3.70063	40.6662	0.238874				4.44	0.0305176	3.70225	40.6841	0.00365681
4.45	4.09237	3.71075	40.7775	0.490375				4.45	1.99835	3.71062	40.7761	0.239455				4.45	0.0268618	3.70975	40.7665	0.00321876
4.46	4.09937	3.71975	40.8764	0.491213				4.46	2.00343	3.71913	40.8695	0.240064				4.46	0.0274976	3.717	40.8462	0.00329494
4.47	4.10644	3.72637	40.9492	0.492061				4.47	2.00462	3.72637	40.9492	0.240207				4.47	0.0315507	3.72512	40.9354	0.00378061
4.48	4.11073	3.73362	41.0288	0.492575				4.48	2.00423	3.734	41.033	0.240159				4.48	0.0317097	3.73575	41.0522	0.00379966
4.49	4.11463	3.74187	41.1195	0.493041				4.49	2.0074	3.74162	41.1168	0.24054				4.49	0.0282923	3.74538	41.158	0.00339017
4.5	4.12138	3.7505	41.2143	0.493851				4.5	2.01305	3.7505	41.2143	0.241216				4.5	0.0271797	3.75325	41.2445	0.00325685
4.51	4.12869	3.76037	41.3228	0.494727				4.51	2.01583	3.76075	41.3269	0.24155				4.51	0.0294844	3.75963	41.3146	0.00353302
4.52	4.13299	3.76938	41.4217	0.495241				4.52	2.01639	3.77	41.4286	0.241616				4.52	0.030756	3.76625	41.3874	0.00368538
4.53	4.13624	3.77687	41.5041	0.495632				4.53	2.01925	3.77763	41.5124	0.241959				4.53	0.0288486	3.77562	41.4904	0.00345683
4.54	4.14268	3.7845	41.5879	0.496403				4.54	2.02521	3.78412	41.5838	0.242673				4.54	0.0268618	3.78625	41.6071	0.00321876
4.55	4.15103	3.79188	41.669	0.497403				4.55	2.02958	3.79113	41.6607	0.243197				4.55	0.027895	3.79537	41.7074	0.00334256
4.56	4.15659	3.80025	41.761	0.49807				4.56	2.03037	3.801	41.7692	0.243292				4.56	0.0306765	3.80262	41.7871	0.00367586
4.57	4.15969	3.81075	41.8764	0.498441				4.57	2.03141	3.8115	41.8846	0.243416				4.57	0.0313123	3.80837	41.8503	0.00375204
4.58	4.16501	3.82012	41.9794	0.499079				4.58	2.03633	3.82037	41.9821	0.244007				4.58	0.0289281	3.81637	41.9382	0.00346636
4.59	4.17201	3.82788	42.0646	0.499917				4.59	2.04214	3.82725	42.0577	0.244702				4.59	0.0276566	3.82587	42.0426	0.00331399
4.6	4.17765	3.83438	42.136	0.500593				4.6	2.04396	3.83325	42.1236	0.244921				4.6	0.0298818	3.83575	42.1511	0.00358063
4.61	4.18194	3.84112	42.2102	0.501107				4.61	2.04341	3.8415	42.2143	0.244854				4.61	0.0319481	3.84475	42.25	0.00382823
4.62	4.18703	3.85087	42.3173	0.501717				4.62	2.04587	3.85113	42.3201	0.245149				4.62	0.0302792	3.85113	42.3201	0.00362825
4.63	4.19346	3.86137	42.4327	0.502488				4.63	2.05119	3.861	42.4286	0.245787				4.63	0.0284513	3.8585	42.4011	0.00340922
4.64	4.19958	3.8705	42.533	0.503221				4.64	2.05405	3.86975	42.5247	0.24613				4.64	0.0298818	3.86675	42.4918	0.00358063
4.65	4.20435	3.8775	42.6099	0.503793				4.65	2.05445	3.87613	42.5948	0.246178				4.65	0.0313123	3.87538	42.5865	0.00375204
4.66	4.20888	3.88338	42.6745	0.504336				4.66	2.05731	3.88325	42.6731	0.246521				4.66	0.0298818	3.88537	42.6964	0.00358063
4.67	4.21405	3.89125	42.761	0.504955				4.67	2.06248	3.89175	42.7665	0.24714				4.67	0.0290871	3.89425	42.794	0.0034854
4.68	4.21921	3.901	42.8681	0.505574				4.68	2.06518	3.90075	42.8654	0.247464				4.68	0.0309944	3.90175	42.8764	0.00371395
4.69	4.22311	3.91087	42.9766	0.50604				4.69	2.06542	3.91075	42.9753	0.247492				4.69	0.0311534	3.90937	42.9602	0.003733
4.7	4.22764	3.91988	43.0755	0.506583				4.7	2.06725	3.91913	43.0673	0.247711				4.7	0.0282923	3.91675	43.0412	0.00339017
4.71	4.23463	3.92638	43.147	0.507421				4.71	2.0713	3.92638	43.147	0.248197				4.71	0.0272592	3.92512	43.1332	0.00326637
4.72	4.24139	3.93363	43.2266	0.508231				4.72	2.07464	3.934	43.2308	0.248597				4.72	0.0294844	3.93562	43.2486	0.00353302
4.73	4.24465	3.94188	43.3173	0.508621				4.73	2.07671	3.94175	43.3159	0.248844				4.73	0.0306765	3.94512	43.353	0.00367586
4.74	4.24719	3.9505	43.4121	0.508926				4.74	2.07917	3.95063	43.4135	0.24914				4.74	0.0290871	3.95288	43.4382	0.0034854
4.75	4.25291	3.96037	43.5206	0.509611				4.75	2.08243	3.961	43.5275	0.24953				4.75	0.0288486	3.95938	43.5096	0.00345683
4.76	4.2599	3.96925	43.6181	0.510449				4.76	2.08561	3.97012	43.6277	0.249911				4.76	0.0311534	3.96612	43.5838	0.003733
4.77	4.26443	3.97662	43.6992	0.510992				4.77	2.08799	3.9775	43.7088	0.250197				4.77	0.0329812	3.9755	43.6868	0.00395203
4.78	4.26738	3.9845	43.7857	0.511345				4.78	2.09053	3.98413	43.7816	0.250501				4.78	0.0320276	3.98612	43.8036	0.00383775
4.79	4.27294	3.99187	43.8668	0.512011				4.79	2.09483	3.99125	43.8599	0.251016				4.79	0.0303586	3.99538	43.9052	0.00363777
4.8	4.28088	4.00012	43.9574	0.512963				4.8	2.09896	4.00113	43.9684	0.251511				4.8	0.0306765	4.00263	43.9849	0.00367586
4.81	4.28669	4.01075	44.0742	0.513659				4.81	2.10015	4.01163	44.0838	0.251654				4.81	0.0333786	4.00838	44.0481	0.00399964
4.82	4.28971	4.02025	44.1786	0.514021				4.82	2.09999	4.02037	44.1799	0.251635				4.82	0.0341733	4.01638	44.136	0.00409487
4.83	4.29352	4.028	44.2637	0.514478				4.83	2.10277	4.02725	44.2555	0.251968				4.83	0.0303586	4.02588	44.2404	0.00363777
4.84	4.30051	4.0345	44.3352	0.515316				4.84	2.10762	4.03325	44.3214	0.252549				4.84	0.0274181	4.03562	44.3475	0.00328542
4.85	4.30687	4.04125	44.4093	0.516077				4.85	2.11	4.0415	44.4121	0.252834				4.85	0.0299613	4.04488	44.4492	0.00359015
4.86	4.30926	4.05075	44.5137	0.516363				4.86	2.1108	4.05125	44.5192	0.25293				4.86	0.0333786	4.0515	44.522	0.00399964
4.87	4.31077	4.06125	44.6291	0.516544				4.87	2.1143	4.06125	44.6291	0.253349				4.87	0.0315507	4.05863	44.6003	0.00378061
4.88	4.31553	4.07038	44.7294	0.517115				4.88	2.11986	4.07	44.7253	0.254015				4.88	0.0288486	4.067	44.6923	0.00345683
4.89	4.32165	4.0775	44.8077	0.517849				4.89	2.12296	4.07637	44.7953	0.254387				4.89	0.0306765	4.0755	44.7857	0.00367586
4.9	4.32539	4.08338	44.8723	0.518296				4.9	2.12367	4.08338	44.8723	0.254472				4.9	0.0331402	4.08525	44.8929	0.00397107
4.91	4.32785	4.09138	44.9602	0.518592				4.91	2.1255	4.09187	44.9657	0.254691				4.91	0.0317891	4.09438	44.9931	0.00380918
4.92	4.33278	4.10088	45.0646	0.519182				4.92	2.129	4.10088	45.0646	0.25511				4.92	0.0299613	4.10213	45.0783	0.00359015
4.93	4.34017	4.11062	45.1717	0.520068				4.93	2.13162	4.11088	45.1745	0.255425				4.93	0.0313918	4.1095	45.1593	0.00376157
4.94	4.34621	4.11988	45.2734	0.520791				4.94	2.13273	4.11925	45.2665	0.255558				4.94	0.0344912	4.11675	45.239	0.00413296
4.95	4.35011	4.1265	45.3462	0.521258				4.95	2.13496	4.12675	45.3489	0.255825				4.95	0.0354449	4.12512	45.331	0.00424724
4.96	4.35519	4.13338	45.4217	0.521867				4.96	2.13909	4.13425	45.4313	0.25632				4.96	0.0340144	4.13563	45.4464	0.00407583
4.97	4.36195	4.14187	45.5151	0.522677				4.97	2.14338	4.14175	45.5137	0.256834				4.97	0.0327428	4.14513	45.5508	0.00392346
4.98	4.36775	4.1505	45.6099	0.523372				4.98	2.14521	4.1505	45.6099	0.257053				4.98	0.0325839	4.15287	45.636	0.00390441
4.99	4.37188	4.16038	45.7184	0.523867				4.99	2.14601	4.161	45.7253	0.257148				4.99	0.0333786	4.15937	45.7074	0.00399964
5	4.37697	4.16925	45.8159	0.524477				5	2.14918	4.17	45.8242	0.257529				5	0.0341733	4.16613	45.7816	0.00409487
5.01	4.38325	4.177	45.9011	0.525229				5.01	2.15387	4.1775	45.9066	0.258091				5.01	0.0344117	4.17575	45.8874	0.00412344
5.02	4.38833	4.1845	45.9835	0.525838				5.02	2.15673	4.18412	45.9794	0.258434				5.02	0.0342528	4.18625	46.0027	0.00410439
5.03	4.39223	4.19187	46.0646	0.526305				5.03	2.15824	4.19125	46.0577	0.258615				5.03	0.0341733	4.19538	46.103	0.00409487
5.04	4.397	4.20025	46.1566	0.526876				5.04	2.16174	4.20113	46.1662	0.259034				5.04	0.0332197	4.2025	46.1813	0.00398059
5.05	4.40319	4.21075	46.272	0.527619				5.05	2.16667	4.2115	46.2802	0.259624				5.05	0.0324249	4.20825	46.2445	0.00388537
5.06	4.40931	4.21988	46.3723	0.528353				5.06	2.16889	4.22025	46.3764	0.259891				5.06	0.0327428	4.21625	46.3324	0.00392346
5.07	4.41384	4.22762	46.4574	0.528895				5.07	2.1685	4.22725	46.4533	0.259843				5.07	0.0329812	4.22588	46.4382	0.00395203
5.08	4.41821	4.23412	46.5288	0.529419				5.08	2.16993	4.23325	46.5192	0.260015				5.08	0.0325839	4.23562	46.5453	0.00390441
5.09	4.42394	4.241	46.6044	0.530105				5.09	2.17342	4.24137	46.6085	0.260434				5.09	0.0328223	4.24475	46.6456	0.00393298
5.1	4.43006	4.25075	46.7115	0.530838				5.1	2.17573	4.25125	46.717	0.26071				5.1	0.0342528	4.25113	46.7157	0.00410439
5.11	4.43403	4.26138	46.8283	0.531314				5.11	2.17668	4.26112	46.8255	0.260824				5.11	0.0344117	4.2585	46.7967	0.00412344
5.12	4.43665	4.2705	46.9286	0.531628				5.12	2.17938	4.26975	46.9203	0.261148				5.12	0.0325839	4.26675	46.8874	0.00390441
5.13	4.44086	4.2775	47.0055	0.532133				5.13	2.18336	4.276	46.989	0.261624				5.13	0.0320276	4.27538	46.9821	0.00383775
5.14	4.44802	4.28338	47.0701	0.53299				5.14	2.18511	4.28325	47.0687	0.261834				5.14	0.0344912	4.28525	47.0907	0.00413296
5.15	4.45422	4.2915	47.1593	0.533733				5.15	2.18479	4.29175	47.1621	0.261795				5.15	0.0362396	4.29425	47.1896	0.00434247
5.16	4.45811	4.301	47.2637	0.5342				5.16	2.18654	4.30075	47.261	0.262005				5.16	0.0340144	4.30187	47.2734	0.00407583
5.17	4.46383	4.31088	47.3723	0.534885				5.17	2.19115	4.31075	47.3709	0.262557				5.17	0.0313918	4.3095	47.3571	0.00376157
5.18	4.47249	4.32	47.4725	0.535923				5.18	2.1956	4.319	47.4615	0.263091				5.18	0.0329812	4.31675	47.4368	0.00395203
5.19	4.47949	4.32637	47.5426	0.536761				5.19	2.19671	4.3265	47.544	0.263224				5.19	0.036478	4.325	47.5275	0.00437104
5.2	4.48275	4.33338	47.6195	0.537152				5.2	2.19727	4.33413	47.6277	0.263291				5.2	0.0367165	4.3355	47.6429	0.0043996
5.21	4.48648	4.34187	47.7129	0.537599				5.21	2.20084	4.34175	47.7115	0.263719				5.21	0.033776	4.345	47.7473	0.00404726
5.22	4.49332	4.3505	47.8077	0.538418				5.22	2.20593	4.35062	47.8091	0.264329				5.22	0.0325839	4.35288	47.8338	0.00390441
5.23	4.49983	4.36025	47.9148	0.539199				5.23	2.20799	4.361	47.9231	0.264576				5.23	0.0352065	4.3595	47.9066	0.00421867
5.24	4.50341	4.36925	48.0137	0.539628				5.24	2.20784	4.36988	48.0206	0.264557				5.24	0.0376701	4.366	47.978	0.00451388
5.25	4.50643	4.377	48.0989	0.53999				5.25	2.21046	4.37737	48.103	0.264871				5.25	0.0360807	4.3755	48.0824	0.00432342
5.26	4.51056	4.38462	48.1827	0.540485				5.26	2.21578	4.384	48.1758	0.26551				5.26	0.0334581	4.38612	48.1992	0.00400916
5.27	4.51549	4.39187	48.2624	0.541075				5.27	2.21848	4.39112	48.2541	0.265833				5.27	0.0341733	4.39537	48.3008	0.00409487
5.28	4.5201	4.40025	48.3544	0.541627				5.28	2.21761	4.40125	48.3654	0.265729				5.28	0.0363191	4.40262	48.3805	0.00435199
5.29	4.52455	4.41075	48.4698	0.542161				5.29	2.21904	4.41162	48.4794	0.2659				5.29	0.035286	4.40838	48.4437	0.00422819
5.3	4.52987	4.42025	48.5742	0.542799				5.3	2.22381	4.42037	48.5755	0.266471				5.3	0.0320276	4.41625	48.5302	0.00383775
5.31	4.53647	4.42788	48.658	0.543589				5.31	2.22675	4.42725	48.6511	0.266824				5.31	0.0320276	4.42587	48.636	0.00383775
5.32	4.54251	4.4345	48.7308	0.544313				5.32	2.22667	4.43325	48.717	0.266814				5.32	0.0352065	4.43562	48.7431	0.00421867
5.33	4.54656	4.44125	48.8049	0.544799				5.33	2.22794	4.4415	48.8077	0.266966				5.33	0.0359217	4.44487	48.8448	0.00430437
5.34	4.54942	4.45075	48.9093	0.545142				5.34	2.23128	4.45125	48.9148	0.267366				5.34	0.0344117	4.45162	48.919	0.00412344
5.35	4.55324	4.46113	49.0234	0.545599				5.35	2.23351	4.46125	49.0247	0.267633				5.35	0.0340144	4.45887	48.9986	0.00407583
5.36	4.55745	4.47025	49.1236	0.546103				5.36	2.2339	4.46988	49.1195	0.267681				5.36	0.0344912	4.467	49.0879	0.00413296
5.37	4.56055	4.4775	49.2033	0.546475				5.37	2.23517	4.476	49.1868	0.267833				5.37	0.033776	4.47537	49.1799	0.00404726
5.38	4.56476	4.48337	49.2679	0.546979				5.38	2.23819	4.48325	49.2665	0.268195				5.38	0.0328223	4.48525	49.2885	0.00393298
5.39	4.57112	4.49113	49.353	0.547741				5.39	2.24066	4.49175	49.3599	0.26849				5.39	0.033776	4.4945	49.3901	0.00404726
5.4	4.57668	4.50087	49.4602	0.548408				5.4	2.24153	4.50075	49.4588	0.268595				5.4	0.0355244	4.502	49.4725	0.00425676
5.41	4.5805	4.51075	49.5687	0.548865				5.41	2.24272	4.51075	49.5687	0.268738				5.41	0.0356833	4.5095	49.5549	0.00427581
5.42	4.58487	4.51987	49.669	0.549389				5.42	2.24622	4.51912	49.6607	0.269157				5.42	0.0344117	4.51687	49.636	0.00412344
5.43	4.59107	4.5265	49.7418	0.550132				5.43	2.25012	4.52637	49.7404	0.269623				5.43	0.033617	4.525	49.7253	0.00402821
5.44	4.59663	4.53375	49.8214	0.550798				5.44	2.25043	4.534	49.8242	0.269661				5.44	0.0344117	4.53562	49.842	0.00412344
5.45	4.59989	4.542	49.9121	0.551189				5.45	2.24932	4.54162	49.908	0.269528				5.45	0.0346502	4.54525	49.9478	0.00415201
5.46	4.60283	4.55063	50.0069	0.551541				5.46	2.25186	4.55063	50.0069	0.269833				5.46	0.0331402	4.55312	50.0343	0.00397107
5.47	4.60768	4.5605	50.1154	0.552122				5.47	2.25695	4.56112	50.1223	0.270442				5.47	0.0324249	4.55962	50.1058	0.00388537
5.48	4.61308	4.56937	50.2129	0.552769				5.48	2.25814	4.57012	50.2212	0.270585				5.48	0.0348091	4.56613	50.1772	0.00417105
5.49	4.61698	4.57688	50.2953	0.553236				5.49	2.256	4.5775	50.3022	0.270328				5.49	0.0367165	4.57562	50.2816	0.0043996
5.5	4.62023	4.58437	50.3777	0.553626				5.5	2.25846	4.58413	50.375	0.270623				5.5	0.0355244	4.58625	50.3984	0.00425676
5.51	4.62524	4.59175	50.4588	0.554226				5.51	2.26482	4.59112	50.4519	0.271385				5.51	0.033617	4.59525	50.4973	0.00402821
5.52	4.63184	4.60025	50.5522	0.555017				5.52	2.26808	4.601	50.5604	0.271776				5.52	0.0348886	4.6025	50.5769	0.00418058
5.53	4.63716	4.61062	50.6662	0.555655				5.53	2.26704	4.6115	50.6758	0.271652				5.53	0.0379085	4.60837	50.6415	0.00454245
5.54	4.64042	4.62	50.7692	0.556045				5.54	2.26792	4.62012	50.7706	0.271757				5.54	0.0383854	4.61625	50.728	0.00459959
5.55	4.64455	4.62775	50.8544	0.55654				5.55	2.27348	4.62688	50.8448	0.272423				5.55	0.0367165	4.62575	50.8324	0.0043996
5.56	4.65155	4.63438	50.9272	0.557378				5.56	2.27904	4.633	50.9121	0.27309				5.56	0.036637	4.63563	50.9409	0.00439008
5.57	4.65798	4.64125	51.0027	0.55815				5.57	2.27976	4.64125	51.0027	0.273175				5.57	0.0379085	4.64475	51.0412	0.00454245
5.58	4.66124	4.65088	51.1085	0.55854				5.58	2.27801	4.65125	51.1126	0.272966				5.58	0.0373522	4.65125	51.1126	0.00447579
5.59	4.6641	4.66137	51.2239	0.558883				5.59	2.2796	4.66113	51.2212	0.273156				5.59	0.035286	4.6585	51.1923	0.00422819
5.6	4.67022	4.6705	51.3242	0.559616				5.6	2.28477	4.66975	51.3159	0.273775				5.6	0.0352065	4.66688	51.2843	0.00421867
5.61	4.67722	4.67762	51.4025	0.560454				5.61	2.28826	4.67587	51.3832	0.274194				5.61	0.0376701	4.67537	51.3777	0.00451388
5.62	4.68159	4.6835	51.467	0.560978				5.62	2.2885	4.68325	51.4643	0.274223				5.62	0.0397364	4.68525	51.4863	0.00476148
5.63	4.68445	4.69137	51.5536	0.561321				5.63	2.29073	4.69175	51.5577	0.27449				5.63	0.0389417	4.69425	51.5852	0.00466625
5.64	4.68906	4.70113	51.6607	0.561873				5.64	2.29669	4.70075	51.6566	0.275204				5.64	0.0367165	4.70175	51.6676	0.0043996
5.65	4.69502	4.711	51.7692	0.562588				5.65	2.30098	4.71087	51.7679	0.275718				5.65	0.036637	4.7095	51.7527	0.00439008
5.66	4.69987	4.71988	51.8668	0.563168				5.66	2.30138	4.71913	51.8585	0.275766				5.66	0.0391801	4.71675	51.8324	0.00469482
5.67	4.7036	4.72637	51.9382	0.563616				5.67	2.30288	4.72637	51.9382	0.275947				5.67	0.0407696	4.725	51.9231	0.00488528
5.68	4.70877	4.73362	52.0179	0.564235				5.68	2.30742	4.73388	52.0206	0.276489				5.68	0.0393391	4.73562	52.0398	0.00471386
5.69	4.71449	4.742	52.1099	0.564921				5.69	2.31155	4.7415	52.1044	0.276985				5.69	0.0383059	4.74512	52.1442	0.00459006
5.7	4.71878	4.75063	52.2047	0.565435				5.7	2.31314	4.7505	52.2033	0.277175				5.7	0.0395775	4.75288	52.2294	0.00474243
5.71	4.72196	4.7605	52.3132	0.565816				5.71	2.31457	4.761	52.3187	0.277347				5.71	0.0402133	4.75938	52.3008	0.00481862
5.72	4.72681	4.76938	52.4107	0.566397				5.72	2.31727	4.76975	52.4148	0.27767				5.72	0.0387033	4.766	52.3736	0.00463768
5.73	4.73285	4.777	52.4945	0.56712				5.73	2.32013	4.77712	52.4959	0.278013				5.73	0.0377496	4.77538	52.4766	0.0045234
5.74	4.73793	4.7845	52.5769	0.56773				5.74	2.32156	4.78388	52.5701	0.278185				5.74	0.0389417	4.78613	52.5948	0.00466625
5.75	4.74183	4.79188	52.658	0.568196				5.75	2.32307	4.79113	52.6497	0.278365				5.75	0.0393391	4.79537	52.6964	0.00471386
5.76	4.74683	4.80025	52.75	0.568796				5.76	2.32657	4.80112	52.7596	0.278784				5.76	0.0383059	4.80262	52.7761	0.00459006
5.77	4.75279	4.81088	52.8668	0.569511				5.77	2.33046	4.81163	52.875	0.279251				5.77	0.0390212	4.8085	52.8407	0.00467577
5.78	4.75717	4.82025	52.9698	0.570035				5.78	2.33213	4.82038	52.9712	0.279451				5.78	0.0407696	4.8165	52.9286	0.00488528
5.79	4.75979	4.828	53.0549	0.570349				5.79	2.33388	4.82712	53.0453	0.279661				5.79	0.0400543	4.82575	53.0302	0.00479957
5.8	4.76376	4.83462	53.1277	0.570825				5.8	2.33841	4.83312	53.1113	0.280203				5.8	0.038147	4.8355	53.1374	0.00457102
5.81	4.77068	4.84125	53.2005	0.571653				5.81	2.34302	4.8415	53.2033	0.280756				5.81	0.0385443	4.845	53.2418	0.00461863
5.82	4.77672	4.85062	53.3036	0.572377				5.82	2.34461	4.85137	53.3118	0.280946				5.82	0.0403722	4.85163	53.3146	0.00483766
5.83	4.77982	4.86125	53.4203	0.572749				5.83	2.34612	4.86125	53.4203	0.281127				5.83	0.0402133	4.85862	53.3915	0.00481862
5.84	4.78284	4.87038	53.5206	0.57311				5.84	2.35105	4.86988	53.5151	0.281718				5.84	0.0387033	4.867	53.4835	0.00463768
5.85	4.7888	4.8775	53.5989	0.573825				5.85	2.35597	4.876	53.5824	0.282308				5.85	0.0383059	4.87538	53.5755	0.00459006
5.86	4.79579	4.88338	53.6635	0.574663				5.86	2.35693	4.88325	53.6621	0.282422				5.86	0.0399748	4.88513	53.6827	0.00479005
5.87	4.79992	4.89138	53.7514	0.575158				5.87	2.35589	4.89175	53.7555	0.282298				5.87	0.0418822	4.89438	53.7843	0.0050186
5.88	4.80223	4.90088	53.8558	0.575434				5.88	2.3578	4.90088	53.8558	0.282527				5.88	0.0416438	4.90238	53.8723	0.00499003
5.89	4.80708	4.91075	53.9643	0.576015				5.89	2.36257	4.91087	53.9657	0.283098				5.89	0.0400543	4.90988	53.9547	0.00479957
5.9	4.8151	4.91988	54.0646	0.576977				5.9	2.3663	4.91913	54.0563	0.283546				5.9	0.0406106	4.917	54.033	0.00486623
5.91	4.82154	4.9265	54.1374	0.577748				5.91	2.3667	4.92675	54.1401	0.283594				5.91	0.0424385	4.925	54.1209	0.00508526
5.92	4.82424	4.9335	54.2143	0.578072				5.92	2.3675	4.93412	54.2212	0.283689				5.92	0.0412464	4.93562	54.2376	0.00494241
5.93	4.82734	4.942	54.3077	0.578443				5.93	2.37298	4.94175	54.3049	0.284346				5.93	0.0379085	4.94525	54.3434	0.00454245
5.94	4.83362	4.9505	54.4011	0.579196				5.94	2.37942	4.95062	54.4025	0.285117				5.94	0.0376701	4.95312	54.4299	0.00451388
5.95	4.83942	4.9605	54.511	0.579891				5.95	2.38045	4.961	54.5165	0.285241				5.95	0.0414054	4.95962	54.5014	0.00496146
5.96	4.84212	4.96925	54.6071	0.580215				5.96	2.37878	4.96988	54.614	0.285041				5.96	0.0433127	4.96625	54.5742	0.00519001
5.97	4.84435	4.97687	54.6909	0.580481				5.97	2.38148	4.97725	54.6951	0.285365				5.97	0.0411669	4.9755	54.6758	0.00493289
5.98	4.84991	4.98438	54.7734	0.581148				5.98	2.38681	4.98388	54.7679	0.286003				5.98	0.0395775	4.986	54.7912	0.00474243
5.99	4.85698	4.99175	54.8544	0.581995				5.99	2.38784	4.99113	54.8475	0.286127				5.99	0.0411669	4.99538	54.8942	0.00493289
6	4.86143	5.00012	54.9464	0.582529				6	2.38625	5.00113	54.9574	0.285936				6	0.0428359	5.00275	54.9753	0.00513287
6.01	4.8635	5.01063	55.0618	0.582776				6.01	2.38872	5.0115	55.0714	0.286231				6.01	0.0418027	5.00863	55.0398	0.00500907
6.02	4.86724	5.02	55.1648	0.583224				6.02	2.3946	5.02025	55.1676	0.286936				6.02	0.0402133	5.01638	55.125	0.00481862
6.03	4.8732	5.02762	55.2486	0.583938				6.03	2.39873	5.02688	55.2404	0.287431				6.03	0.0404517	5.02575	55.228	0.00484718
6.04	4.879	5.03425	55.3214	0.584633				6.04	2.40056	5.03287	55.3063	0.28765				6.04	0.0414054	5.0355	55.3352	0.00496146
6.05	4.88385	5.04113	55.397	0.585214				6.05	2.4027	5.04138	55.3997	0.287907				6.05	0.040849	5.04475	55.4368	0.0048948
6.06	4.88861	5.05075	55.5027	0.585785				6.06	2.4062	5.05125	55.5082	0.288327				6.06	0.0393391	5.05162	55.5124	0.00471386
6.07	4.89354	5.06125	55.6181	0.586376				6.07	2.40962	5.06112	55.6168	0.288736				6.07	0.0385443	5.05887	55.592	0.00461863
6.08	4.89728	5.07038	55.7184	0.586823				6.08	2.41137	5.06975	55.7115	0.288946				6.08	0.0395775	5.067	55.6813	0.00474243
6.09	4.89998	5.0775	55.7967	0.587147				6.09	2.41296	5.076	55.7802	0.289136				6.09	0.0406106	5.07525	55.772	0.00486623
6.1	4.90427	5.08325	55.8599	0.587661				6.1	2.41629	5.08338	55.8613	0.289536				6.1	0.0399748	5.085	55.8791	0.00479005
6.11	4.91047	5.09138	55.9492	0.588404				6.11	2.42058	5.09175	55.9533	0.29005				6.11	0.0402133	5.09425	55.9808	0.00481862
6.12	4.91595	5.10088	56.0536	0.589061				6.12	2.42265	5.10075	56.0522	0.290298				6.12	0.0422001	5.10213	56.0673	0.00505669
6.13	4.91993	5.11062	56.1607	0.589537				6.13	2.42345	5.11075	56.1621	0.290393				6.13	0.0418822	5.10963	56.1497	0.0050186
6.14	4.92446	5.11975	56.261	0.59008				6.14	2.42654	5.11888	56.2514	0.290764				6.14	0.0395775	5.11675	56.228	0.00474243
6.15	4.93034	5.12625	56.3324	0.590785				6.15	2.4302	5.12625	56.3324	0.291202				6.15	0.0407696	5.12488	56.3173	0.00488528
6.16	4.93495	5.13325	56.4093	0.591337				6.16	2.43163	5.13375	56.4148	0.291374				6.16	0.0442664	5.1355	56.4341	0.00530428
6.17	4.93733	5.14175	56.5027	0.591623				6.17	2.43338	5.1415	56.5	0.291583				6.17	0.0439485	5.14525	56.5412	0.00526619
6.18	4.94003	5.1505	56.5989	0.591947				6.18	2.43823	5.15062	56.6003	0.292164				6.18	0.040849	5.15313	56.6277	0.0048948
6.19	4.94567	5.16025	56.706	0.592623				6.19	2.4426	5.16075	56.7115	0.292688				6.19	0.0414054	5.15963	56.6992	0.00496146
6.2	4.95219	5.16937	56.8063	0.593404				6.2	2.44315	5.1695	56.8077	0.292755				6.2	0.0452995	5.16625	56.772	0.00542808
6.21	4.95617	5.177	56.8901	0.59388				6.21	2.44244	5.17713	56.8915	0.292669				6.21	0.045379	5.17563	56.875	0.00543761
6.22	4.95855	5.1845	56.9725	0.594166				6.22	2.44594	5.18375	56.9643	0.293088				6.22	0.0416438	5.18612	56.9904	0.00499003
6.23	4.96308	5.19187	57.0536	0.594708				6.23	2.45229	5.191	57.044	0.29385				6.23	0.0399748	5.19538	57.092	0.00479005
6.24	4.96976	5.20012	57.1442	0.595508				6.24	2.45571	5.20113	57.1552	0.294259				6.24	0.0422001	5.20287	57.1745	0.00505669
6.25	4.97468	5.21063	57.2596	0.596099				6.25	2.45555	5.2115	57.2692	0.29424				6.25	0.0445048	5.20862	57.2376	0.00533285
6.26	4.9777	5.22	57.3626	0.596461				6.26	2.45738	5.22013	57.364	0.294459				6.26	0.0441074	5.21638	57.3228	0.00528524
6.27	4.98207	5.228	57.4505	0.596984				6.27	2.46278	5.22687	57.4382	0.295107				6.27	0.0422796	5.22588	57.4272	0.00506621
6.28	4.98867	5.2345	57.522	0.597775				6.28	2.46684	5.233	57.5055	0.295593				6.28	0.0422796	5.23562	57.5343	0.00506621
6.29	4.99439	5.24113	57.5948	0.59846				6.29	2.46668	5.24125	57.5962	0.295573				6.29	0.0445048	5.245	57.6374	0.00533285
6.3	4.99749	5.25063	57.6992	0.598832				6.3	2.46747	5.25138	57.7074	0.295669				6.3	0.0446638	5.25175	57.7115	0.0053519
6.31	5.00059	5.26125	57.8159	0.599203				6.31	2.47264	5.26112	57.8146	0.296288				6.31	0.0406106	5.259	57.7912	0.00486623
6.32	5.00552	5.27037	57.9162	0.599794				6.32	2.47772	5.26962	57.908	0.296897				6.32	0.0385443	5.26725	57.8819	0.00461863
6.33	5.01045	5.27775	57.9973	0.600384				6.33	2.47844	5.276	57.978	0.296983				6.33	0.042518	5.27562	57.9739	0.00509478
6.34	5.01378	5.28362	58.0618	0.600784				6.34	2.47844	5.28338	58.0591	0.296983				6.34	0.0461737	5.28525	58.0797	0.00553284
6.35	5.01688	5.2915	58.1484	0.601155				6.35	2.48249	5.29175	58.1511	0.297469				6.35	0.0446638	5.29462	58.1827	0.0053519
6.36	5.02141	5.301	58.2527	0.601698				6.36	2.48806	5.30063	58.2486	0.298135				6.36	0.0428359	5.3025	58.2692	0.00513287
6.37	5.02714	5.31088	58.3613	0.602384				6.37	2.48996	5.31062	58.3585	0.298364				6.37	0.0442664	5.30987	58.3503	0.00530428
6.38	5.03167	5.32	58.4615	0.602927				6.38	2.48933	5.31925	58.4533	0.298287				6.38	0.0449816	5.317	58.4286	0.00538999
6.39	5.03556	5.32637	58.5316	0.603393				6.39	2.49116	5.3265	58.533	0.298506				6.39	0.0429153	5.32512	58.5179	0.00514239
6.4	5.04073	5.33362	58.6113	0.604012				6.4	2.49656	5.33413	58.6168	0.299154				6.4	0.0418027	5.33563	58.6332	0.00500907
6.41	5.04621	5.34187	58.7019	0.60467				6.41	2.50101	5.34175	58.7005	0.299687				6.41	0.0428359	5.34525	58.739	0.00513287
6.42	5.04994	5.35062	58.7981	0.605117				6.42	2.50149	5.3505	58.7967	0.299745				6.42	0.0430743	5.35313	58.8255	0.00516144
6.43	5.05328	5.3605	58.9066	0.605517				6.43	2.50252	5.36088	58.9107	0.299868				6.43	0.0422796	5.35963	58.897	0.00506621
6.44	5.059	5.36925	59.0027	0.606203				6.44	2.50785	5.37	59.011	0.300506				6.44	0.0426769	5.36625	58.9698	0.00511383
6.45	5.06536	5.37662	59.0838	0.606964				6.45	2.51277	5.3775	59.0934	0.301097				6.45	0.0445048	5.37538	59.0701	0.00533285
6.46	5.06886	5.38425	59.1676	0.607384				6.46	2.51301	5.38413	59.1662	0.301125				6.46	0.0459353	5.38612	59.1882	0.00550427
6.47	5.07069	5.39175	59.25	0.607603				6.47	2.51277	5.39112	59.2431	0.301097				6.47	0.0457764	5.39525	59.2885	0.00548522
6.48	5.0753	5.40038	59.3448	0.608155				6.48	2.51627	5.401	59.3516	0.301516				6.48	0.0445048	5.4025	59.3681	0.00533285
6.49	5.08229	5.41087	59.4602	0.608993				6.49	2.52096	5.4115	59.467	0.302078				6.49	0.0445048	5.4085	59.4341	0.00533285
6.5	5.08801	5.41988	59.5591	0.609679				6.5	2.52287	5.42025	59.5632	0.302306				6.5	0.0463327	5.41638	59.5206	0.00555188
6.51	5.09151	5.42775	59.6456	0.610098				6.51	2.5243	5.42713	59.6387	0.302478				6.51	0.04673	5.42575	59.6236	0.0055995
6.52	5.09644	5.43438	59.7184	0.610688				6.52	2.52819	5.43325	59.706	0.302944				6.52	0.0452995	5.43537	59.7294	0.00542808
6.53	5.10367	5.44113	59.7926	0.611555				6.53	2.53232	5.4415	59.7967	0.303439				6.53	0.0447432	5.44475	59.8324	0.00536142
6.54	5.10939	5.45087	59.8997	0.61224				6.54	2.53336	5.45125	59.9038	0.303563				6.54	0.0463327	5.45162	59.908	0.00555188
6.55	5.11193	5.46138	60.0151	0.612545				6.55	2.53312	5.46113	60.0124	0.303535				6.55	0.0464121	5.45875	59.9863	0.00556141
6.56	5.11535	5.47025	60.1126	0.612954				6.56	2.53518	5.47	60.1099	0.303782				6.56	0.0437101	5.467	60.0769	0.00523762
6.57	5.12131	5.47725	60.1896	0.613669				6.57	2.53916	5.47625	60.1786	0.304258				6.57	0.0432332	5.47525	60.1676	0.00518049
6.58	5.12671	5.48325	60.2555	0.614316				6.58	2.54218	5.48337	60.2569	0.30462				6.58	0.04673	5.48513	60.2761	0.0055995
6.59	5.12894	5.49113	60.342	0.614583				6.59	2.54321	5.49188	60.3503	0.304744				6.59	0.048399	5.49425	60.3764	0.00579948
6.6	5.13069	5.50087	60.4492	0.614792				6.6	2.54528	5.50087	60.4492	0.304992				6.6	0.0449816	5.50225	60.4643	0.00538999
6.61	5.13538	5.51088	60.5591	0.615354				6.61	2.55021	5.511	60.5604	0.305582				6.61	0.0424385	5.50962	60.5453	0.00508526
6.62	5.14158	5.51975	60.6566	0.616097				6.62	2.55489	5.51912	60.6497	0.306144				6.62	0.0445048	5.51675	60.6236	0.00533285
6.63	5.14603	5.52625	60.728	0.61663				6.63	2.55593	5.5265	60.7308	0.306268				6.63	0.0474453	5.525	60.7143	0.0056852
6.64	5.14873	5.5335	60.8077	0.616954				6.64	2.5568	5.534	60.8132	0.306372				6.64	0.0469685	5.5355	60.8297	0.00562807
6.65	5.15366	5.54188	60.8997	0.617545				6.65	2.56157	5.54175	60.8984	0.306944				6.65	0.0449022	5.54525	60.9368	0.00538047
6.66	5.16144	5.5505	60.9945	0.618478				6.66	2.56665	5.55063	60.9959	0.307553				6.66	0.0447432	5.55312	61.0234	0.00536142
6.67	5.1674	5.56037	61.103	0.619192				6.67	2.56769	5.561	61.1099	0.307677				6.67	0.0464121	5.55975	61.0962	0.00556141
6.68	5.16971	5.56925	61.2005	0.619468				6.68	2.56777	5.57	61.2088	0.307687				6.68	0.0470479	5.56625	61.1676	0.00563759
6.69	5.17265	5.57675	61.283	0.61982				6.69	2.57103	5.57737	61.2898	0.308077				6.69	0.0452995	5.5755	61.2692	0.00542808
6.7	5.17861	5.5845	61.3681	0.620535				6.7	2.57508	5.584	61.3626	0.308563				6.7	0.043869	5.58613	61.386	0.00525667
6.71	5.18473	5.59187	61.4492	0.621268				6.71	2.57635	5.59112	61.4409	0.308715				6.71	0.0451406	5.59537	61.4876	0.00540904
6.72	5.18823	5.60013	61.5398	0.621687				6.72	2.57738	5.60112	61.5508	0.308839				6.72	0.04673	5.60275	61.5687	0.0055995
6.73	5.19156	5.61062	61.6552	0.622087				6.73	2.58128	5.6115	61.6648	0.309306				6.73	0.0465711	5.6085	61.6319	0.00558045
6.74	5.19729	5.62	61.7582	0.622773				6.74	2.58581	5.62025	61.761	0.309848				6.74	0.0457764	5.61637	61.7184	0.00548522
6.75	5.20309	5.62788	61.8448	0.623468				6.75	2.58811	5.627	61.8352	0.310124				6.75	0.0463327	5.62575	61.8214	0.00555188
6.76	5.20738	5.63438	61.9162	0.623982				6.76	2.58954	5.633	61.9011	0.310296				6.76	0.0477632	5.6355	61.9286	0.0057233
6.77	5.21207	5.64112	61.9904	0.624544				6.77	2.59225	5.64138	61.9931	0.31062				6.77	0.0476042	5.64487	62.0316	0.00570425
6.78	5.21835	5.65062	62.0948	0.625296				6.78	2.5959	5.65125	62.1016	0.311058				6.78	0.0469685	5.65163	62.1058	0.00562807
6.79	5.22471	5.66125	62.2115	0.626058				6.79	2.59836	5.66113	62.2102	0.311353				6.79	0.0476042	5.65862	62.1827	0.00570425
6.8	5.22963	5.67037	62.3118	0.626648				6.8	2.59884	5.66975	62.3049	0.31141				6.8	0.04824	5.66713	62.2761	0.00578043
6.81	5.23408	5.67762	62.3915	0.627182				6.81	2.60027	5.676	62.3736	0.311581				6.81	0.0477632	5.6755	62.3681	0.0057233
6.82	5.23925	5.6835	62.456	0.627801				6.82	2.60456	5.68313	62.4519	0.312096				6.82	0.0470479	5.68525	62.4753	0.00563759
6.83	5.24386	5.6915	62.544	0.628353				6.83	2.60782	5.69175	62.5467	0.312486				6.83	0.0476042	5.69463	62.5783	0.00570425
6.84	5.24648	5.70087	62.647	0.628667				6.84	2.60806	5.70075	62.6456	0.312515				6.84	0.0478427	5.70263	62.6662	0.00573282
6.85	5.24855	5.71075	62.7555	0.628915				6.85	2.60949	5.71063	62.7541	0.312686				6.85	0.0469685	5.71012	62.7486	0.00562807
6.86	5.25363	5.72	62.8571	0.629524				6.86	2.61482	5.71913	62.8475	0.313324				6.86	0.0461737	5.71725	62.8269	0.00553284
6.87	5.26134	5.7265	62.9286	0.630448				6.87	2.61879	5.72675	62.9313	0.3138				6.87	0.0470479	5.72525	62.9148	0.00563759
6.88	5.26794	5.73337	63.0041	0.631239				6.88	2.61791	5.73412	63.0124	0.313696				6.88	0.0486374	5.73562	63.0288	0.00582805
6.89	5.2708	5.74188	63.0975	0.631581				6.89	2.61776	5.74162	63.0948	0.313677				6.89	0.048399	5.74538	63.136	0.00579948
6.9	5.27366	5.7505	63.1923	0.631924				6.9	2.62268	5.75038	63.1909	0.314267				6.9	0.04673	5.75325	63.2225	0.0055995
6.91	5.27978	5.7605	63.3022	0.632657				6.91	2.62817	5.76088	63.3063	0.314924				6.91	0.0472069	5.75975	63.294	0.00565663
6.92	5.28646	5.76938	63.3997	0.633457				6.92	2.6292	5.76975	63.4038	0.315048				6.92	0.0504653	5.76625	63.3654	0.00604708
6.93	5.29011	5.77712	63.4849	0.633895				6.93	2.62817	5.77738	63.4876	0.314924				6.93	0.0515779	5.77562	63.4684	0.0061804
6.94	5.29242	5.78475	63.5687	0.634172				6.94	2.63087	5.784	63.5604	0.315248				6.94	0.0491937	5.78613	63.5838	0.00589471
6.95	5.29758	5.79188	63.647	0.634791				6.95	2.63691	5.79125	63.6401	0.315972				6.95	0.0478427	5.7955	63.6868	0.00573282
6.96	5.30457	5.80037	63.7404	0.635629				6.96	2.64033	5.801	63.7473	0.316381				6.96	0.0498295	5.803	63.7692	0.00597089
6.97	5.30879	5.81088	63.8558	0.636133				6.97	2.64033	5.8115	63.8626	0.316381				6.97	0.0511011	5.80875	63.8324	0.00612326
6.98	5.31085	5.82038	63.9602	0.636381				6.98	2.642	5.8205	63.9615	0.316581				6.98	0.0488758	5.81637	63.9162	0.00585662
6.99	5.31499	5.828	64.044	0.636876				6.99	2.64716	5.82763	64.0398	0.3172				6.99	0.0464121	5.82587	64.0206	0.00556141
7	5.32206	5.8345	64.1154	0.637724				7	2.65122	5.8335	64.1044	0.317686				7	0.0476042	5.83563	64.1277	0.00570425
7.01	5.32905	5.84125	64.1896	0.638562				7.01	2.65122	5.8415	64.1923	0.317686				7.01	0.049909	5.84488	64.2294	0.00598041
7.02	5.33374	5.85088	64.2953	0.639124				7.02	2.65129	5.85125	64.2995	0.317695				7.02	0.0500679	5.8515	64.3022	0.00599946
7.03	5.33748	5.86137	64.4107	0.639571				7.03	2.65503	5.86113	64.408	0.318143				7.03	0.0490348	5.85875	64.3819	0.00587566
7.04	5.34153	5.8705	64.511	0.640057				7.04	2.65964	5.86988	64.5041	0.318695				7.04	0.0498295	5.86688	64.4712	0.00597089
7.05	5.3455	5.8775	64.5879	0.640533				7.05	2.66139	5.87625	64.5742	0.318905				7.05	0.0517368	5.87538	64.5646	0.00619944
7.06	5.3494	5.88338	64.6525	0.641				7.06	2.66178	5.88363	64.6552	0.318952				7.06	0.0513395	5.88525	64.6731	0.00615183
7.07	5.35377	5.89138	64.7404	0.641523				7.07	2.66377	5.89187	64.7459	0.31919				7.07	0.0486374	5.89425	64.772	0.00582805
7.08	5.35949	5.90113	64.8475	0.642209				7.08	2.66695	5.90075	64.8434	0.319571				7.08	0.0473658	5.902	64.8571	0.00567568
7.09	5.36561	5.911	64.956	0.642942				7.09	2.66894	5.91075	64.9533	0.319809				7.09	0.0487963	5.9095	64.9396	0.00584709
7.1	5.37038	5.92	65.0549	0.643514				7.1	2.66973	5.91937	65.0481	0.319905				7.1	0.0508626	5.91675	65.0192	0.00609469
7.11	5.37467	5.92638	65.125	0.644028				7.11	2.67204	5.92675	65.1291	0.320181				7.11	0.0508626	5.92513	65.1113	0.00609469
7.12	5.37984	5.9335	65.2033	0.644647				7.12	2.67569	5.93425	65.2115	0.320619				7.12	0.0496705	5.93562	65.2266	0.00595185
7.13	5.3854	5.942	65.2967	0.645313				7.13	2.67736	5.94175	65.294	0.320819				7.13	0.0498295	5.94512	65.331	0.00597089
7.14	5.38993	5.95062	65.3915	0.645856				7.14	2.67736	5.95062	65.3915	0.320819				7.14	0.0505447	5.95312	65.419	0.0060566
7.15	5.39406	5.9605	65.5	0.646352				7.15	2.67967	5.96113	65.5069	0.321095				7.15	0.0500679	5.9595	65.489	0.00599946
7.16	5.39962	5.96938	65.5975	0.647018				7.16	2.68436	5.97013	65.6058	0.321657				7.16	0.0494321	5.966	65.5604	0.00592328
7.17	5.40598	5.977	65.6813	0.64778				7.17	2.68666	5.9775	65.6868	0.321933				7.17	0.0507037	5.9755	65.6648	0.00607565
7.18	5.41067	5.9845	65.7637	0.648342				7.18	2.6869	5.984	65.7582	0.321962				7.18	0.0522931	5.98613	65.7816	0.0062661
7.19	5.41425	5.99188	65.8448	0.64877				7.19	2.68936	5.99125	65.8379	0.322257				7.19	0.05126	5.99525	65.8819	0.0061423
7.2	5.41933	6.00025	65.9368	0.64938				7.2	2.69326	6.00125	65.9478	0.322723				7.2	0.0495116	6.0025	65.9615	0.0059328
7.21	5.42514	6.01075	66.0522	0.650075				7.21	2.69484	6.01163	66.0618	0.322914				7.21	0.0504653	6.00825	66.0247	0.00604708
7.22	5.42903	6.02013	66.1552	0.650541				7.22	2.69469	6.02025	66.1566	0.322895				7.22	0.0518958	6.01612	66.1113	0.00621849
7.23	5.43173	6.02787	66.2404	0.650865				7.23	2.69675	6.02725	66.2335	0.323142				7.23	0.0508626	6.02575	66.217	0.00609469
7.24	5.43658	6.0345	66.3132	0.651446				7.24	2.70144	6.03325	66.2995	0.323704				7.24	0.0495116	6.03562	66.3255	0.0059328
7.25	5.44381	6.04125	66.3874	0.652313				7.25	2.70462	6.04138	66.3887	0.324085				7.25	0.0513395	6.04475	66.4258	0.00615183
7.26	5.44961	6.05087	66.4931	0.653008				7.26	2.70494	6.05138	66.4986	0.324123				7.26	0.0539621	6.05138	66.4986	0.00646609
7.27	5.45335	6.06125	66.6071	0.653456				7.27	2.70581	6.06125	66.6071	0.324228				7.27	0.0530084	6.05863	66.5783	0.00635181
7.28	5.45804	6.0705	66.7088	0.654017				7.28	2.71058	6.07	66.7033	0.324799				7.28	0.0511011	6.067	66.6703	0.00612326
7.29	5.46463	6.07775	66.7885	0.654808				7.29	2.71614	6.07625	66.772	0.325466				7.29	0.0523726	6.0755	66.7637	0.00627563
7.3	5.47004	6.0835	66.8516	0.655455				7.3	2.71718	6.0835	66.8516	0.32559				7.3	0.0554721	6.08525	66.8709	0.00664702
7.31	5.47306	6.09125	66.9368	0.655817				7.31	2.71511	6.092	66.9451	0.325342				7.31	0.0564257	6.09438	66.9712	0.0067613
7.32	5.4764	6.101	67.044	0.656217				7.32	2.7167	6.10088	67.0426	0.325533				7.32	0.0545979	6.10187	67.0536	0.00654227
7.33	5.48252	6.11088	67.1525	0.656951				7.33	2.72266	6.11088	67.1525	0.326247				7.33	0.0530084	6.10963	67.1387	0.00635181
7.34	5.48887	6.11988	67.2514	0.657712				7.34	2.72632	6.11937	67.2459	0.326685				7.34	0.0540416	6.11688	67.2184	0.00647561
7.35	5.49301	6.1265	67.3242	0.658208				7.35	2.72576	6.12662	67.3255	0.326618				7.35	0.0552336	6.125	67.3077	0.00661845
7.36	5.49626	6.13375	67.4038	0.658598				7.36	2.72663	6.13413	67.408	0.326723				7.36	0.0530084	6.13563	67.4245	0.00635181
7.37	5.50151	6.142	67.4945	0.659227				7.37	2.73188	6.14175	67.4918	0.327351				7.37	0.0494321	6.14537	67.5316	0.00592328
7.38	5.50779	6.1505	67.5879	0.659979				7.38	2.73601	6.15062	67.5893	0.327847				7.38	0.0494321	6.15325	67.6181	0.00592328
7.39	5.51176	6.16038	67.6964	0.660455				7.39	2.73609	6.16113	67.7047	0.327856				7.39	0.05277	6.15975	67.6896	0.00632324
7.4	5.51407	6.1695	67.7967	0.660731				7.4	2.73585	6.17012	67.8036	0.327828				7.4	0.0538031	6.16625	67.761	0.00644704
7.41	5.5186	6.17713	67.8805	0.661274				7.41	2.73935	6.1775	67.8846	0.328247				7.41	0.0515779	6.17563	67.864	0.0061804
7.42	5.52551	6.18462	67.9629	0.662102				7.42	2.74412	6.18412	67.9574	0.328818				7.42	0.0514984	6.18625	67.9808	0.00617087
7.43	5.53147	6.192	68.044	0.662817				7.43	2.74587	6.19125	68.0357	0.329028				7.43	0.0540416	6.19538	68.081	0.00647561
7.44	5.53497	6.20038	68.136	0.663236				7.44	2.74547	6.20113	68.1442	0.32898				7.44	0.0548363	6.20263	68.1607	0.00657084
7.45	5.53854	6.21088	68.2514	0.663664				7.45	2.74754	6.21162	68.2596	0.329228				7.45	0.0526905	6.2085	68.2253	0.00631372
7.46	5.54387	6.22	68.3516	0.664302				7.46	2.75246	6.22025	68.3544	0.329818				7.46	0.0515779	6.21638	68.3118	0.0061804
7.47	5.54935	6.22762	68.4354	0.664959				7.47	2.7554	6.22713	68.4299	0.33017				7.47	0.0530084	6.22563	68.4135	0.00635181
7.48	5.55348	6.23425	68.5082	0.665455				7.48	2.75604	6.23313	68.4959	0.330246				7.48	0.0544389	6.23538	68.5206	0.00652322
7.49	5.55762	6.24113	68.5838	0.66595				7.49	2.7585	6.2415	68.5879	0.330542				7.49	0.0544389	6.24475	68.6236	0.00652322
7.5	5.56294	6.25087	68.6909	0.666588				7.5	2.76319	6.25125	68.6951	0.331104				7.5	0.0540416	6.2515	68.6978	0.00647561
7.51	5.56819	6.2615	68.8077	0.667216				7.51	2.76629	6.26112	68.8036	0.331475				7.51	0.0539621	6.25863	68.7761	0.00646609
7.52	5.57224	6.2705	68.9066	0.667702				7.52	2.76709	6.26975	68.8984	0.33157				7.52	0.0535647	6.267	68.8681	0.00641847
7.53	5.57621	6.27762	68.9849	0.668178				7.53	2.76939	6.276	68.967	0.331846				7.53	0.05277	6.2755	68.9615	0.00632324
7.54	5.58217	6.28338	69.0481	0.668892				7.54	2.77305	6.28325	69.0467	0.332284				7.54	0.0523726	6.28525	69.0687	0.00627563
7.55	5.58774	6.29138	69.136	0.669559				7.55	2.77511	6.29175	69.1401	0.332532				7.55	0.0533263	6.29437	69.169	0.0063899
7.56	5.59012	6.30113	69.2431	0.669845				7.56	2.77599	6.30075	69.239	0.332637				7.56	0.0549952	6.30225	69.2555	0.00658988
7.57	5.59163	6.311	69.3516	0.670026				7.57	2.77821	6.31075	69.3489	0.332903				7.57	0.0549952	6.30975	69.3379	0.00658988
7.58	5.59719	6.31987	69.4492	0.670692				7.58	2.78115	6.31912	69.4409	0.333256				7.58	0.0538031	6.31687	69.4162	0.00644704
7.59	5.60514	6.32625	69.5192	0.671644				7.59	2.78282	6.32637	69.5206	0.333456				7.59	0.0540416	6.325	69.5055	0.00647561
7.6	5.61015	6.3335	69.5989	0.672244				7.6	2.78282	6.334	69.6044	0.333456				7.6	0.0553926	6.3355	69.6209	0.0066375
7.61	5.61277	6.34187	69.6909	0.672559				7.61	2.78425	6.34175	69.6896	0.333627				7.61	0.0542005	6.34513	69.7266	0.00649465
7.62	5.61778	6.3505	69.7857	0.673159				7.62	2.7887	6.35063	69.7871	0.33416				7.62	0.0514984	6.35288	69.8118	0.00617087
7.63	5.62541	6.3605	69.8956	0.674073				7.63	2.79268	6.361	69.9011	0.334637				7.63	0.0523726	6.35938	69.8832	0.00627563
7.64	5.63113	6.36925	69.9918	0.674758				7.64	2.79323	6.36975	69.9973	0.334703				7.64	0.0562668	6.366	69.956	0.00674225
7.65	5.63399	6.37675	70.0742	0.675101				7.65	2.79331	6.37713	70.0783	0.334713				7.65	0.0566642	6.37538	70.0591	0.00678987
7.66	5.63772	6.38438	70.158	0.675549				7.66	2.79721	6.38387	70.1525	0.335179				7.66	0.0538031	6.386	70.1758	0.00644704
7.67	5.64448	6.39187	70.2404	0.676358				7.67	2.80205	6.39112	70.2321	0.33576				7.67	0.0533263	6.39537	70.2788	0.0063899
7.68	5.65068	6.40038	70.3338	0.677101				7.68	2.80277	6.40113	70.342	0.335846				7.68	0.0554721	6.40275	70.3599	0.00664702
7.69	5.65378	6.41087	70.4492	0.677472				7.69	2.80174	6.41162	70.4574	0.335722				7.69	0.0564257	6.40862	70.4245	0.0067613
7.7	5.65616	6.42025	70.5522	0.677758				7.7	2.80476	6.42037	70.5536	0.336084				7.7	0.0548363	6.41638	70.5096	0.00657084
7.71	5.66141	6.428	70.6374	0.678387				7.71	2.80992	6.42713	70.6277	0.336703				7.71	0.0537236	6.42575	70.6126	0.00643752
7.72	5.668	6.4345	70.7088	0.679177				7.72	2.81255	6.43313	70.6937	0.337017				7.72	0.0549952	6.43537	70.7184	0.00658988
7.73	5.67246	6.44125	70.783	0.67971				7.73	2.81239	6.44163	70.7871	0.336998				7.73	0.0564257	6.445	70.8242	0.0067613
7.74	5.67476	6.45087	70.8887	0.679986				7.74	2.81429	6.45137	70.8942	0.337227				7.74	0.055631	6.45188	70.8997	0.00666607
7.75	5.67842	6.46138	71.0041	0.680425				7.75	2.81922	6.46125	71.0027	0.337817				7.75	0.0537236	6.45875	70.9753	0.00643752
7.76	5.68382	6.47038	71.103	0.681072				7.76	2.82248	6.46988	71.0975	0.338208				7.76	0.0534058	6.467	71.0659	0.00639942
7.77	5.68851	6.4775	71.1813	0.681634				7.77	2.82272	6.47612	71.1662	0.338236				7.77	0.0553926	6.47537	71.158	0.0066375
7.78	5.69161	6.48337	71.2459	0.682005				7.78	2.82391	6.48325	71.2445	0.338379				7.78	0.0565052	6.485	71.2637	0.00677082
7.79	5.69558	6.49137	71.3338	0.682481				7.79	2.82828	6.49188	71.3393	0.338903				7.79	0.0557899	6.49437	71.3668	0.00668511
7.8	5.7013	6.501	71.4396	0.683167				7.8	2.83217	6.50087	71.4382	0.339369				7.8	0.0554721	6.50237	71.4547	0.00664702
7.81	5.70703	6.51088	71.5481	0.683853				7.81	2.83281	6.51075	71.5467	0.339446				7.81	0.0562668	6.50988	71.5371	0.00674225
7.82	5.71132	6.52	71.6484	0.684367				7.82	2.83321	6.51912	71.6387	0.339493				7.82	0.0557899	6.517	71.6154	0.00668511
7.83	5.71545	6.5265	71.7198	0.684862				7.83	2.83631	6.52675	71.7225	0.339865				7.83	0.0537236	6.52513	71.7047	0.00643752
7.84	5.72061	6.53362	71.7981	0.685481				7.84	2.8398	6.53413	71.8036	0.340284				7.84	0.0533263	6.53562	71.8201	0.0063899
7.85	5.72578	6.54188	71.8887	0.6861				7.85	2.84084	6.54175	71.8874	0.340408				7.85	0.0547568	6.54525	71.9258	0.00656132
7.86	5.72991	6.55063	71.9849	0.686595				7.86	2.84139	6.55063	71.9849	0.340474				7.86	0.0548363	6.55312	72.0124	0.00657084
7.87	5.73436	6.56062	72.0948	0.687129				7.87	2.84473	6.561	72.0989	0.340874				7.87	0.0540416	6.55975	72.0852	0.00647561
7.88	5.73993	6.56938	72.1909	0.687795				7.88	2.85006	6.57	72.1978	0.341512				7.88	0.0553926	6.56625	72.1566	0.0066375
7.89	5.7447	6.57675	72.272	0.688367				7.89	2.85276	6.57737	72.2788	0.341836				7.89	0.0574589	6.57562	72.2596	0.0068851
7.9	5.74692	6.58425	72.3544	0.688633				7.9	2.85268	6.584	72.3516	0.341826				7.9	0.0576973	6.586	72.3736	0.00691367
7.91	5.74962	6.59175	72.4368	0.688957				7.91	2.85355	6.59112	72.4299	0.341931				7.91	0.0566642	6.59538	72.4767	0.00678987
7.92	5.75527	6.60037	72.5316	0.689633				7.92	2.85681	6.60112	72.5398	0.342322				7.92	0.0568231	6.60288	72.5591	0.00680891
7.93	5.76162	6.61088	72.647	0.690395				7.93	2.85927	6.6115	72.6538	0.342617				7.93	0.0583331	6.60862	72.6223	0.00698985
7.94	5.76568	6.62012	72.7486	0.690881				7.94	2.85999	6.62025	72.75	0.342703				7.94	0.0589689	6.61625	72.7061	0.00706603
7.95	5.76798	6.62775	72.8324	0.691157				7.95	2.86285	6.62713	72.8255	0.343045				7.95	0.0572999	6.62575	72.8105	0.00686605
7.96	5.77251	6.63438	72.9052	0.6917				7.96	2.86802	6.63312	72.8915	0.343664				7.96	0.0552336	6.6355	72.9176	0.00661845
7.97	5.77887	6.64125	72.9808	0.692462				7.97	2.87104	6.64125	72.9808	0.344026				7.97	0.0553926	6.64475	73.0192	0.0066375
7.98	5.78316	6.651	73.0879	0.692976				7.98	2.87016	6.65125	73.0907	0.343921				7.98	0.0570615	6.6515	73.0934	0.00683748
7.99	5.78507	6.6615	73.2033	0.693204				7.99	2.87016	6.66113	73.1992	0.343921				7.99	0.0570615	6.65875	73.1731	0.00683748
8	5.78872	6.6705	73.3022	0.693642				8	2.8739	6.66975	73.294	0.344369				8	0.0550747	6.667	73.2637	0.00659941
8.01	5.79548	6.67737	73.3777	0.694452				8.01	2.87787	6.67613	73.364	0.344845				8.01	0.0558694	6.67537	73.3558	0.00669464
8.02	5.80168	6.68325	73.4423	0.695195				8.02	2.87882	6.6835	73.4451	0.344959				8.02	0.0597636	6.68513	73.4629	0.00716126
8.03	5.80502	6.69137	73.5316	0.695595				8.03	2.87946	6.69175	73.5357	0.345036				8.03	0.0609557	6.69438	73.5646	0.00730411
8.04	5.80804	6.70125	73.6401	0.695956				8.04	2.88383	6.70075	73.6346	0.345559				8.04	0.0576973	6.70213	73.6497	0.00691367
8.05	5.81328	6.711	73.7473	0.696585				8.05	2.8886	6.71075	73.7445	0.346131				8.05	0.055631	6.70962	73.7321	0.00666607
8.06	5.81924	6.71988	73.8448	0.697299				8.06	2.889	6.719	73.8352	0.346178				8.06	0.0582536	6.71675	73.8104	0.00698032
8.07	5.82337	6.72625	73.9148	0.697794				8.07	2.88733	6.72625	73.9148	0.345978				8.07	0.0603199	6.725	73.9011	0.00722792
8.08	5.82679	6.73338	73.9931	0.698204				8.08	2.88971	6.73388	73.9986	0.346264				8.08	0.058492	6.7355	74.0165	0.00700889
8.09	5.8314	6.74188	74.0865	0.698756				8.09	2.89512	6.7415	74.0824	0.346912				8.09	0.0572999	6.74512	74.1223	0.00686605
8.1	5.83673	6.75075	74.1841	0.699394				8.1	2.89742	6.7505	74.1813	0.347188				8.1	0.0592867	6.753	74.2088	0.00710412
8.11	5.84062	6.76063	74.2926	0.699861				8.11	2.89679	6.76075	74.294	0.347112				8.11	0.0609557	6.7595	74.2802	0.00730411
8.12	5.84364	6.76925	74.3874	0.700223				8.12	2.89885	6.76962	74.3915	0.347359				8.12	0.060002	6.76612	74.353	0.00718983
8.13	5.84777	6.77675	74.4698	0.700718				8.13	2.90418	6.77725	74.4753	0.347997				8.13	0.0585715	6.77538	74.4547	0.00701842
8.14	5.85238	6.78425	74.5522	0.70127				8.14	2.90752	6.78388	74.5481	0.348397				8.14	0.0580947	6.786	74.5714	0.00696128
8.15	5.85691	6.79175	74.6346	0.701813				8.15	2.90728	6.791	74.6264	0.348369				8.15	0.0579357	6.79525	74.6731	0.00694223
8.16	5.86144	6.80037	74.7294	0.702356				8.16	2.90728	6.80113	74.7376	0.348369				8.16	0.0579357	6.80275	74.7555	0.00694223
8.17	5.86669	6.81088	74.8448	0.702984				8.17	2.91038	6.8115	74.8517	0.34874				8.17	0.0582536	6.80863	74.8201	0.00698032
8.18	5.87185	6.81987	74.9437	0.703603				8.18	2.91363	6.82025	74.9478	0.349131				8.18	0.0585715	6.81637	74.9052	0.00701842
8.19	5.87503	6.8275	75.0275	0.703984				8.19	2.91483	6.827	75.022	0.349273				8.19	0.0591278	6.82575	75.0082	0.00708508
8.2	5.87749	6.83413	75.1003	0.70428				8.2	2.91657	6.83312	75.0893	0.349483				8.2	0.0589689	6.8355	75.1154	0.00706603
8.21	5.88202	6.84112	75.1772	0.704822				8.21	2.9215	6.84125	75.1786	0.350073				8.21	0.0575384	6.84475	75.217	0.00689462
8.22	5.8887	6.851	75.2857	0.705622				8.22	2.92603	6.85125	75.2885	0.350616				8.22	0.0568231	6.8515	75.2912	0.00680891
8.23	5.89426	6.86137	75.3997	0.706289				8.23	2.92659	6.86113	75.397	0.350683				8.23	0.0585715	6.85875	75.3709	0.00701842
8.24	5.89776	6.87038	75.4986	0.706708				8.24	2.92579	6.86963	75.4904	0.350588				8.24	0.0603994	6.867	75.4615	0.00723744
8.25	5.90149	6.87725	75.5742	0.707155				8.25	2.92889	6.87587	75.5591	0.350959				8.25	0.0599225	6.87525	75.5522	0.00718031
8.26	5.90714	6.88325	75.6401	0.707832				8.26	2.93446	6.88325	75.6401	0.351626				8.26	0.0595252	6.885	75.6593	0.00713269
8.27	5.91183	6.89138	75.7294	0.708393				8.27	2.93652	6.89175	75.7335	0.351873				8.27	0.0614325	6.89425	75.761	0.00736124
8.28	5.91366	6.90113	75.8365	0.708613				8.28	2.93573	6.90075	75.8324	0.351778				8.28	0.0626246	6.902	75.8462	0.00750409
8.29	5.91675	6.911	75.9451	0.708984				8.29	2.93716	6.91075	75.9423	0.351949				8.29	0.0610352	6.90975	75.9313	0.00731363
8.3	5.92359	6.91988	76.0426	0.709803				8.3	2.94185	6.919	76.033	0.352511				8.3	0.0596046	6.917	76.011	0.00714221
8.31	5.93011	6.92625	76.1126	0.710584				8.31	2.94471	6.92625	76.1126	0.352854				8.31	0.0607173	6.925	76.0989	0.00727554
8.32	5.93257	6.9335	76.1923	0.710879				8.32	2.94407	6.934	76.1978	0.352778				8.32	0.061353	6.9355	76.2143	0.00735172
8.33	5.93527	6.94187	76.2843	0.711203				8.33	2.94431	6.94163	76.2816	0.352806				8.33	0.060002	6.94525	76.3214	0.00718983
8.34	5.94163	6.95062	76.3805	0.711965				8.34	2.9486	6.95038	76.3778	0.353321				8.34	0.0585715	6.95325	76.4093	0.00701842
8.35	5.94862	6.96063	76.4904	0.712803				8.35	2.95274	6.96075	76.4918	0.353816				8.35	0.0593662	6.95975	76.4808	0.00711365
8.36	5.95196	6.96913	76.5838	0.713203				8.36	2.95289	6.97	76.5934	0.353835				8.36	0.0614325	6.96625	76.5522	0.00736124
8.37	5.95379	6.97663	76.6662	0.713422				8.37	2.95194	6.97738	76.6745	0.353721				8.37	0.0619888	6.97537	76.6525	0.0074279
8.38	5.95816	6.98412	76.7486	0.713945				8.38	2.9552	6.984	76.7473	0.354111				8.38	0.0601609	6.986	76.7692	0.00720888
8.39	5.96515	6.99175	76.8324	0.714783				8.39	2.96092	6.991	76.8242	0.354797				8.39	0.0587304	6.99538	76.8723	0.00703746
8.4	5.9704	7.00038	76.9272	0.715412				8.4	2.96299	7.00075	76.9313	0.355044				8.4	0.060002	7.00275	76.9533	0.00718983
8.41	5.97215	7.01075	77.0412	0.715621				8.41	2.96219	7.01138	77.0481	0.354949				8.41	0.0614325	7.0085	77.0165	0.00736124
8.42	5.97461	7.01988	77.1415	0.715917				8.42	2.96386	7.02013	77.1442	0.355149				8.42	0.0603994	7.01638	77.103	0.00723744
8.43	5.98057	7.02763	77.2267	0.716631				8.43	2.96839	7.02712	77.2212	0.355692				8.43	0.0591278	7.02575	77.206	0.00708508
8.44	5.98796	7.03413	77.2981	0.717516				8.44	2.97125	7.03313	77.2871	0.356035				8.44	0.0607173	7.03525	77.3104	0.00727554
8.45	5.99305	7.04113	77.375	0.718126				8.45	2.97165	7.04125	77.3764	0.356082				8.45	0.0624657	7.04475	77.4148	0.00748504
8.46	5.99639	7.05087	77.4821	0.718526				8.46	2.97348	7.05087	77.4821	0.356301				8.46	0.0617504	7.05162	77.4904	0.00739933
8.47	6.00131	7.06137	77.5975	0.719116				8.47	2.97801	7.06088	77.592	0.356844				8.47	0.0603994	7.05875	77.5687	0.00723744
8.48	6.00711	7.07025	77.6951	0.719812				8.48	2.9815	7.06975	77.6896	0.357263				8.48	0.0607173	7.067	77.6593	0.00727554
8.49	6.01061	7.07737	77.7734	0.720231				8.49	2.98214	7.07613	77.7596	0.357339				8.49	0.0611941	7.07525	77.75	0.00733267
8.5	6.01363	7.08338	77.8393	0.720592				8.5	2.98262	7.08325	77.8379	0.357396				8.5	0.0605583	7.08512	77.8585	0.00725649
8.51	6.01927	7.09138	77.9272	0.721268				8.51	2.98548	7.09175	77.9313	0.357739				8.51	0.0599225	7.09438	77.9602	0.00718031
8.52	6.02587	7.10112	78.0343	0.722059				8.52	2.98834	7.10063	78.0289	0.358082				8.52	0.0603199	7.1025	78.0495	0.00722792
8.53	6.03016	7.111	78.1429	0.722573				8.53	2.98897	7.11062	78.1387	0.358158				8.53	0.061353	7.10987	78.1305	0.00735172
8.54	6.03318	7.11975	78.239	0.722935				8.54	2.98985	7.11913	78.2321	0.358263				8.54	0.0623862	7.117	78.2088	0.00747552
8.55	6.03795	7.12625	78.3104	0.723506				8.55	2.99303	7.12663	78.3146	0.358644				8.55	0.0627836	7.12488	78.2953	0.00752313
8.56	6.04367	7.1335	78.3901	0.724192				8.56	2.99557	7.13413	78.397	0.358949				8.56	0.0620683	7.13537	78.4107	0.00743743
8.57	6.04741	7.14175	78.4808	0.72464				8.57	2.99636	7.14163	78.4794	0.359044				8.57	0.0614325	7.14525	78.5192	0.00736124
8.58	6.05027	7.1505	78.5769	0.724983				8.58	2.9978	7.15038	78.5755	0.359215				8.58	0.0615915	7.15313	78.6058	0.00738029
8.59	6.05464	7.1605	78.6868	0.725506				8.59	3.00153	7.16075	78.6896	0.359663				8.59	0.0619888	7.15975	78.6786	0.0074279
8.6	6.06036	7.16913	78.7816	0.726192				8.6	3.00503	7.16988	78.7898	0.360082				8.6	0.0620683	7.16625	78.75	0.00743743
8.61	6.06426	7.1765	78.8626	0.726659				8.61	3.00582	7.17737	78.8723	0.360177				8.61	0.063022	7.1755	78.8516	0.0075517
8.62	6.0664	7.18425	78.9478	0.726916				8.62	3.00646	7.184	78.9451	0.360253				8.62	0.0640551	7.186	78.967	0.0076755
8.63	6.06982	7.19175	79.0302	0.727325				8.63	3.01035	7.19113	79.0234	0.36072				8.63	0.0638167	7.19538	79.0701	0.00764693
8.64	6.07522	7.20012	79.1223	0.727973				8.64	3.01449	7.20087	79.1305	0.361215				8.64	0.0634988	7.20275	79.1511	0.00760884
8.65	6.08015	7.21063	79.2376	0.728563				8.65	3.01472	7.21125	79.2445	0.361244				8.65	0.0650883	7.2085	79.2143	0.0077993
8.66	6.08349	7.21988	79.3393	0.728963				8.66	3.01329	7.22013	79.342	0.361072				8.66	0.065883	7.2165	79.3022	0.00789453
8.67	6.08714	7.22762	79.4245	0.729401				8.67	3.01592	7.22713	79.419	0.361387				8.67	0.0634988	7.22588	79.4052	0.00760884
8.68	6.0935	7.23412	79.4959	0.730163				8.68	3.02172	7.23313	79.4849	0.362082				8.68	0.0618299	7.2355	79.511	0.00740886
8.69	6.09986	7.241	79.5714	0.730925				8.69	3.02418	7.24125	79.5742	0.362377				8.69	0.0636578	7.24488	79.614	0.00762789
8.7	6.10304	7.25063	79.6772	0.731306				8.7	3.02315	7.251	79.6813	0.362253				8.7	0.0650883	7.25163	79.6882	0.0077993
8.71	6.10511	7.26125	79.794	0.731553				8.71	3.02458	7.26088	79.7898	0.362425				8.71	0.062863	7.25863	79.7651	0.00753266
8.72	6.11019	7.27025	79.8929	0.732163				8.72	3.0295	7.26975	79.8874	0.363015				8.72	0.0605583	7.26713	79.8585	0.00725649
8.73	6.11719	7.27738	79.9712	0.733001				8.73	3.03261	7.276	79.956	0.363386				8.73	0.0614325	7.2755	79.9505	0.00736124
8.74	6.12259	7.28338	80.0371	0.733648				8.74	3.03117	7.28325	80.0357	0.363215				8.74	0.0634193	7.28525	80.0577	0.00759932
8.75	6.1264	7.29138	80.125	0.734105				8.75	3.02974	7.29175	80.1291	0.363044				8.75	0.0634193	7.2945	80.1593	0.00759932
8.76	6.13101	7.301	80.2308	0.734658				8.76	3.03324	7.30063	80.2266	0.363463				8.76	0.0622272	7.30237	80.2459	0.00745647
8.77	6.13713	7.31075	80.3379	0.735391				8.77	3.03857	7.3105	80.3352	0.364101				8.77	0.0622272	7.30987	80.3283	0.00745647
8.78	6.14214	7.32	80.4396	0.735991				8.78	3.04023	7.31912	80.4299	0.364301				8.78	0.0640551	7.31712	80.408	0.0076755
8.79	6.14476	7.3265	80.511	0.736305				8.79	3.0396	7.32675	80.5137	0.364224				8.79	0.0654856	7.32512	80.4959	0.00784691
8.8	6.1477	7.33362	80.5893	0.736658				8.8	3.0419	7.33437	80.5975	0.364501				8.8	0.0638167	7.3355	80.6099	0.00764693
8.81	6.15279	7.342	80.6813	0.737267				8.81	3.04723	7.34175	80.6786	0.365139				8.81	0.0611941	7.34525	80.717	0.00733267
8.82	6.15851	7.35063	80.7761	0.737953				8.82	3.04985	7.35037	80.7734	0.365453				8.82	0.0620683	7.35313	80.8036	0.00743743
8.83	6.16185	7.3605	80.8846	0.738353				8.83	3.04921	7.36075	80.8874	0.365377				8.83	0.0653267	7.35963	80.875	0.00782787
8.84	6.16431	7.36925	80.9808	0.738648				8.84	3.05033	7.36988	80.9876	0.36551				8.84	0.0662804	7.36613	80.9464	0.00794214
8.85	6.169	7.377	81.0659	0.73921				8.85	3.05422	7.37763	81.0728	0.365977				8.85	0.064532	7.3755	81.0495	0.00773264
8.86	6.17425	7.3845	81.1484	0.739838				8.86	3.05708	7.38425	81.1456	0.366319				8.86	0.0644525	7.386	81.1648	0.00772312
8.87	6.1779	7.39187	81.2294	0.740276				8.87	3.05764	7.39112	81.2212	0.366386				8.87	0.065883	7.39537	81.2679	0.00789453
8.88	6.181	7.40038	81.3228	0.740648				8.88	3.05796	7.40088	81.3283	0.366424				8.88	0.0654856	7.40275	81.3489	0.00784691
8.89	6.18609	7.41075	81.4368	0.741257				8.89	3.06002	7.41125	81.4423	0.366672				8.89	0.0640551	7.4085	81.4121	0.0076755
8.9	6.19205	7.42	81.5385	0.741972				8.9	3.06249	7.42037	81.5426	0.366967				8.9	0.0642935	7.41625	81.4973	0.00770407
8.91	6.19618	7.4275	81.6209	0.742467				8.91	3.06368	7.42762	81.6223	0.36711				8.91	0.0649293	7.42575	81.6016	0.00778025
8.92	6.19912	7.43412	81.6937	0.742819				8.92	3.06511	7.4335	81.6868	0.367281				8.92	0.0641346	7.4355	81.7088	0.00768502
8.93	6.20405	7.44113	81.7706	0.743409				8.93	3.06805	7.44137	81.7734	0.367634				8.93	0.0634988	7.44475	81.8104	0.00760884
8.94	6.20985	7.45075	81.8764	0.744105				8.94	3.07091	7.45113	81.8805	0.367976				8.94	0.0648499	7.4515	81.8846	0.00777073
8.95	6.2139	7.46125	81.9918	0.74459				8.95	3.07147	7.461	81.989	0.368043				8.95	0.0661214	7.45875	81.9643	0.0079231
8.96	6.21597	7.47025	82.0907	0.744838				8.96	3.07226	7.46988	82.0865	0.368138				8.96	0.0650883	7.46688	82.0536	0.0077993
8.97	6.21923	7.47738	82.169	0.745228				8.97	3.076	7.47625	82.1566	0.368586				8.97	0.0636578	7.47525	82.1456	0.00762789
8.98	6.22479	7.48325	82.2335	0.745895				8.98	3.07957	7.48362	82.2376	0.369014				8.98	0.0642935	7.48513	82.2541	0.00770407
8.99	6.23012	7.49125	82.3214	0.746533				8.99	3.07949	7.492	82.3297	0.369005				8.99	0.0662804	7.49425	82.3544	0.00794214
9	6.23306	7.501	82.4286	0.746885				9	3.07925	7.50075	82.4258	0.368976				9	0.0663598	7.50188	82.4382	0.00795167
9.01	6.23655	7.51088	82.5371	0.747304				9.01	3.08307	7.51075	82.5357	0.369433				9.01	0.064532	7.50938	82.5206	0.00773264
9.02	6.24251	7.51988	82.636	0.748019				9.02	3.08792	7.5195	82.6319	0.370014				9.02	0.0640551	7.51675	82.6016	0.0076755
9.03	6.24847	7.52613	82.7047	0.748733				9.03	3.08871	7.527	82.7143	0.37011				9.03	0.0661214	7.525	82.6923	0.0079231
9.04	6.25157	7.53338	82.7843	0.749104				9.04	3.08728	7.5345	82.7967	0.369938				9.04	0.067393	7.5355	82.8077	0.00807546
9.05	6.2538	7.54188	82.8777	0.749371				9.05	3.08943	7.542	82.8791	0.370195				9.05	0.0654856	7.54512	82.9135	0.00784691
9.06	6.25841	7.5505	82.9725	0.749923				9.06	3.09451	7.55063	82.9739	0.370805				9.06	0.063022	7.55312	83.0014	0.0075517
9.07	6.26429	7.56037	83.081	0.750628				9.07	3.09682	7.561	83.0879	0.371081				9.07	0.0644525	7.55962	83.0728	0.00772312
9.08	6.26802	7.56938	83.18	0.751075				9.08	3.09499	7.57	83.1868	0.370862				9.08	0.0681877	7.56613	83.1442	0.00817069
9.09	6.27009	7.577	83.2637	0.751323				9.09	3.09515	7.5775	83.2692	0.370881				9.09	0.0684261	7.57562	83.2486	0.00819926
9.1	6.27359	7.5845	83.3462	0.751742				9.1	3.10047	7.584	83.3407	0.371519				9.1	0.0648499	7.58613	83.364	0.00777073
9.11	6.27899	7.59175	83.4258	0.75239				9.11	3.1058	7.59112	83.419	0.372157				9.11	0.0640551	7.59538	83.4657	0.0076755
9.12	6.28352	7.60013	83.5179	0.752932				9.12	3.1058	7.60112	83.5288	0.372157				9.12	0.0667572	7.60262	83.5453	0.00799928
9.13	6.28678	7.6105	83.6319	0.753323				9.13	3.10445	7.6115	83.6429	0.371995				9.13	0.067393	7.6085	83.6099	0.00807546
9.14	6.29091	7.61988	83.7349	0.753818				9.14	3.10731	7.62012	83.7376	0.372338				9.14	0.0650883	7.61625	83.6951	0.0077993
9.15	6.29687	7.62788	83.8228	0.754532				9.15	3.11208	7.627	83.8132	0.372909				9.15	0.0642935	7.62575	83.7995	0.00770407
9.16	6.30204	7.63438	83.8942	0.755151				9.16	3.11367	7.633	83.8791	0.3731				9.16	0.0667572	7.63563	83.908	0.00799928
9.17	6.30554	7.64112	83.9684	0.75557				9.17	3.11311	7.64125	83.9698	0.373033				9.17	0.0679493	7.64488	84.0096	0.00814213
9.18	6.30895	7.65062	84.0728	0.75598				9.18	3.1155	7.651	84.0769	0.373319				9.18	0.0661214	7.65163	84.0838	0.0079231
9.19	6.31348	7.66113	84.1882	0.756523				9.19	3.12003	7.661	84.1868	0.373862				9.19	0.064532	7.65888	84.1635	0.00773264
9.2	6.31825	7.67037	84.2898	0.757094				9.2	3.12233	7.66975	84.283	0.374138				9.2	0.0652472	7.66713	84.2541	0.00781835
9.21	6.32175	7.67788	84.3723	0.757513				9.21	3.12154	7.676	84.3517	0.374043				9.21	0.0665983	7.6755	84.3462	0.00798024
9.22	6.32509	7.6835	84.4341	0.757913				9.22	3.12169	7.68325	84.4313	0.374062				9.22	0.0665188	7.68525	84.4533	0.00797071
9.23	6.33033	7.69137	84.5206	0.758541				9.23	3.12495	7.69175	84.5247	0.374452				9.23	0.0650883	7.69463	84.5563	0.0077993
9.24	6.33558	7.70087	84.625	0.75917				9.24	3.12829	7.70062	84.6223	0.374852				9.24	0.0650883	7.70237	84.6415	0.0077993
9.25	6.33844	7.71063	84.7321	0.759513				9.25	3.12893	7.71063	84.7321	0.374928				9.25	0.0665983	7.71	84.7253	0.00798024
9.26	6.34106	7.71975	84.8324	0.759827				9.26	3.12908	7.71913	84.8255	0.374947				9.26	0.067393	7.71713	84.8036	0.00807546
9.27	6.34623	7.7265	84.9066	0.760446				9.27	3.13139	7.7265	84.9066	0.375223				9.27	0.0662804	7.72513	84.8915	0.00794214
9.28	6.35163	7.73362	84.9849	0.761094				9.28	3.13473	7.73412	84.9904	0.375623				9.28	0.0657241	7.73575	85.0082	0.00787548
9.29	6.35409	7.74188	85.0755	0.761389				9.29	3.13632	7.74162	85.0728	0.375814				9.29	0.0669161	7.7455	85.1154	0.00801833
9.3	6.35648	7.7505	85.1703	0.761674				9.3	3.13751	7.75038	85.169	0.375957				9.3	0.0665983	7.75338	85.2019	0.00798024
9.31	6.36212	7.76037	85.2788	0.762351				9.31	3.14061	7.76075	85.283	0.376328				9.31	0.0649293	7.75988	85.2734	0.00778025
9.32	6.36903	7.7695	85.3791	0.763179				9.32	3.14355	7.76988	85.3833	0.37668				9.32	0.0652472	7.76638	85.3448	0.00781835
9.33	6.37325	7.77712	85.4629	0.763684				9.33	3.14355	7.7775	85.467	0.37668				9.33	0.0669956	7.77562	85.4464	0.00802785
9.34	6.37603	7.7845	85.544	0.764017				9.34	3.14291	7.78413	85.5398	0.376604				9.34	0.0673135	7.78625	85.5632	0.00806594
9.35	6.38064	7.79188	85.625	0.764569				9.35	3.14538	7.79113	85.6168	0.376899				9.35	0.0662804	7.7955	85.6648	0.00794214
9.36	6.38676	7.80025	85.717	0.765303				9.36	3.14943	7.80087	85.7239	0.377385				9.36	0.0663598	7.80275	85.7445	0.00795167
9.37	6.39105	7.81075	85.8324	0.765817				9.37	3.1515	7.81137	85.8393	0.377633				9.37	0.0679493	7.80863	85.8091	0.00814213
9.38	6.39272	7.82025	85.9368	0.766017				9.38	3.15261	7.82038	85.9382	0.377766				9.38	0.0685851	7.8165	85.8956	0.00821831
9.39	6.39518	7.82812	86.0234	0.766312				9.39	3.15547	7.82737	86.0151	0.378109				9.39	0.0673135	7.82587	85.9986	0.00806594
9.4	6.40051	7.8345	86.0934	0.76695				9.4	3.1596	7.83338	86.081	0.378604				9.4	0.065883	7.83563	86.1058	0.00789453
9.41	6.40639	7.84125	86.1676	0.767655				9.41	3.16064	7.8415	86.1703	0.378728				9.41	0.0662804	7.845	86.2088	0.00794214
9.42	6.40956	7.85075	86.272	0.768036				9.42	3.15913	7.85112	86.2761	0.378547				9.42	0.0675519	7.85163	86.2816	0.00809451
9.43	6.41131	7.86137	86.3887	0.768245				9.43	3.16016	7.86088	86.3833	0.378671				9.43	0.067393	7.85862	86.3585	0.00807546
9.44	6.41521	7.87038	86.4876	0.768712				9.44	3.16413	7.86988	86.4821	0.379147				9.44	0.0667572	7.86688	86.4492	0.00799928
9.45	6.42037	7.87763	86.5673	0.769331				9.45	3.16691	7.87638	86.5536	0.37948				9.45	0.0681877	7.8755	86.544	0.00817069
9.46	6.42379	7.88338	86.6305	0.76974				9.46	3.16691	7.88338	86.6305	0.37948				9.46	0.0704924	7.88537	86.6525	0.00844686
9.47	6.42626	7.89138	86.7184	0.770036				9.47	3.16763	7.89187	86.7239	0.379566				9.47	0.0700951	7.89438	86.7514	0.00839925
9.48	6.43102	7.901	86.8242	0.770607				9.48	3.17073	7.90062	86.8201	0.379937				9.48	0.0669161	7.902	86.8352	0.00801833
9.49	6.43698	7.91087	86.9327	0.771321				9.49	3.17319	7.91062	86.9299	0.380232				9.49	0.0652472	7.90963	86.919	0.00781835
9.5	6.44096	7.91988	87.0316	0.771797				9.5	3.17272	7.91937	87.0261	0.380175				9.5	0.0673135	7.91688	86.9986	0.00806594
9.51	6.44318	7.92638	87.103	0.772064				9.51	3.17208	7.92713	87.1113	0.380099				9.51	0.0693798	7.92513	87.0893	0.00831354
9.52	6.44628	7.9335	87.1813	0.772435				9.52	3.17518	7.9345	87.1923	0.380471				9.52	0.0681877	7.93575	87.206	0.00817069
9.53	6.45137	7.94187	87.2734	0.773045				9.53	3.18058	7.94187	87.2734	0.381118				9.53	0.0669161	7.94513	87.3091	0.00801833
9.54	6.4555	7.9505	87.3681	0.77354				9.54	3.18281	7.9505	87.3681	0.381385				9.54	0.0680288	7.95288	87.3942	0.00815165
9.55	6.45796	7.9605	87.478	0.773835				9.55	3.18138	7.961	87.4835	0.381213				9.55	0.0693798	7.95937	87.4657	0.00831354
9.56	6.4613	7.96925	87.5742	0.774235				9.56	3.18138	7.97013	87.5838	0.381213				9.56	0.0684261	7.966	87.5385	0.00819926
9.57	6.46718	7.97675	87.6566	0.77494				9.57	3.18384	7.97762	87.6662	0.381509				9.57	0.0677903	7.97563	87.6442	0.00812308
9.58	6.47275	7.98438	87.7404	0.775606				9.58	3.18511	7.98425	87.739	0.381661				9.58	0.0696182	7.98613	87.7596	0.00834211
9.59	6.47569	7.99188	87.8228	0.775959				9.59	3.18408	7.99137	87.8173	0.381537				9.59	0.0714461	7.99538	87.8613	0.00856114
9.6	6.47815	8.00025	87.9148	0.776254				9.6	3.18472	8.001	87.9231	0.381613				9.6	0.0712872	8.0025	87.9396	0.00854209
9.61	6.48244	8.01075	88.0302	0.776768				9.61	3.18853	8.01137	88.0371	0.38207				9.61	0.0712872	8.00837	88.0041	0.00854209
9.62	6.48745	8.02025	88.1346	0.777368				9.62	3.19099	8.02025	88.1346	0.382366				9.62	0.0721613	8.01625	88.0907	0.00864684
9.63	6.49095	8.028	88.2198	0.777787				9.63	3.1902	8.02712	88.2102	0.38227				9.63	0.0724792	8.02587	88.1964	0.00868493
9.64	6.4942	8.03463	88.2926	0.778178				9.64	3.19028	8.03313	88.2761	0.38228				9.64	0.0718435	8.03562	88.3036	0.00860875
9.65	6.49953	8.04125	88.3654	0.778816				9.65	3.19338	8.0415	88.3681	0.382651				9.65	0.0716845	8.04487	88.4052	0.0085897
9.66	6.50493	8.05075	88.4698	0.779463				9.66	3.19552	8.05125	88.4753	0.382908				9.66	0.0723203	8.05138	88.4766	0.00866589
9.67	6.507	8.06138	88.5865	0.779711				9.67	3.19457	8.06113	88.5838	0.382794				9.67	0.0719229	8.0585	88.5549	0.00861827
9.68	6.50819	8.0705	88.6868	0.779854				9.68	3.19433	8.06988	88.68	0.382766				9.68	0.070254	8.067	88.6484	0.00841829
9.69	6.51248	8.07762	88.7651	0.780368				9.69	3.19759	8.07612	88.7486	0.383156				9.69	0.0688235	8.0755	88.7418	0.00824688
9.7	6.51908	8.08338	88.8283	0.781158				9.7	3.20156	8.08325	88.8269	0.383632				9.7	0.0693798	8.08538	88.8503	0.00831354
9.71	6.52337	8.09137	88.9162	0.781673				9.71	3.20252	8.09187	88.9217	0.383746				9.71	0.0712872	8.09425	88.9478	0.00854209
9.72	6.52544	8.10088	89.0206	0.78192				9.72	3.2018	8.10088	89.0206	0.383661				9.72	0.0715256	8.102	89.033	0.00857066
9.73	6.52901	8.11075	89.1291	0.782349				9.73	3.20363	8.11075	89.1291	0.38388				9.73	0.0698566	8.1095	89.1154	0.00837068
9.74	6.5341	8.11988	89.2294	0.782958				9.74	3.20776	8.11913	89.2212	0.384375				9.74	0.070254	8.11675	89.1951	0.00841829
9.75	6.53839	8.1265	89.3022	0.783472				9.75	3.21015	8.12663	89.3036	0.384661				9.75	0.0739892	8.12513	89.2871	0.00886587
9.76	6.54133	8.1335	89.3791	0.783825				9.76	3.20959	8.13413	89.386	0.384594				9.76	0.0754197	8.13575	89.4039	0.00903728
9.77	6.54562	8.14188	89.4712	0.784339				9.77	3.21039	8.14175	89.4698	0.384689				9.77	0.0724792	8.14513	89.5069	0.00868493
9.78	6.55182	8.1505	89.5659	0.785082				9.78	3.21348	8.15062	89.5673	0.385061				9.78	0.0700951	8.15275	89.5907	0.00839925
9.79	6.55739	8.1605	89.6758	0.785748				9.79	3.21531	8.16088	89.6799	0.38528				9.79	0.0721613	8.15925	89.6621	0.00864684
9.8	6.56041	8.16938	89.7734	0.78611				9.8	3.21452	8.16987	89.7788	0.385184				9.8	0.0749429	8.16625	89.739	0.00898015
9.81	6.56231	8.17713	89.8585	0.786339				9.81	3.21508	8.17763	89.864	0.385251				9.81	0.0739098	8.17575	89.8434	0.00885635
9.82	6.56581	8.18475	89.9423	0.786758				9.82	3.21929	8.18425	89.9368	0.385756				9.82	0.0715256	8.18625	89.9588	0.00857066
9.83	6.5709	8.192	90.022	0.787367				9.83	3.2231	8.19125	90.0137	0.386213				9.83	0.0715256	8.1955	90.0604	0.00857066
9.84	6.57487	8.20038	90.114	0.787843				9.84	3.22294	8.20112	90.1223	0.386194				9.84	0.073274	8.20262	90.1387	0.00878016
9.85	6.57773	8.21075	90.228	0.788186				9.85	3.22215	8.2115	90.2363	0.386099				9.85	0.0728766	8.20838	90.2019	0.00873255
9.86	6.58186	8.22012	90.331	0.788682				9.86	3.22413	8.22025	90.3324	0.386337				9.86	0.0700951	8.21625	90.2885	0.00839925
9.87	6.58719	8.22775	90.4148	0.78932				9.87	3.22692	8.22725	90.4093	0.38667				9.87	0.0693798	8.22588	90.3942	0.00831354
9.88	6.59132	8.23438	90.4876	0.789815				9.88	3.22723	8.23325	90.4753	0.386708				9.88	0.0714461	8.23563	90.5014	0.00856114
9.89	6.59418	8.24113	90.5618	0.790158				9.89	3.22692	8.24137	90.5646	0.38667				9.89	0.0729561	8.24488	90.603	0.00874207
9.9	6.59807	8.25088	90.669	0.790624				9.9	3.2297	8.25113	90.6717	0.387003				9.9	0.0720819	8.25113	90.6717	0.00863732
9.91	6.60324	8.26137	90.7843	0.791243				9.91	3.23407	8.261	90.7802	0.387527				9.91	0.0712872	8.2585	90.7527	0.00854209
9.92	6.60761	8.27037	90.8832	0.791767				9.92	3.23613	8.26975	90.8764	0.387775				9.92	0.0723203	8.26675	90.8434	0.00866589
9.93	6.61127	8.27737	90.9602	0.792205				9.93	3.2359	8.27625	90.9478	0.387746				9.93	0.073274	8.27538	90.9382	0.00878016
9.94	6.6158	8.28325	91.0247	0.792748				9.94	3.23677	8.28375	91.0302	0.387851				9.94	0.0724792	8.28525	91.0467	0.00868493
9.95	6.62033	8.29138	91.114	0.793291				9.95	3.23963	8.292	91.1209	0.388194				9.95	0.0716845	8.29413	91.1442	0.0085897
9.96	6.62319	8.30113	91.2212	0.793633				9.96	3.24162	8.30075	91.217	0.388432				9.96	0.0727177	8.30188	91.2294	0.0087135
9.97	6.62533	8.31087	91.3283	0.793891				9.97	3.24122	8.31075	91.3269	0.388384				9.97	0.0739892	8.30938	91.3118	0.00886587
9.98	6.62939	8.31988	91.4272	0.794376				9.98	3.24209	8.31963	91.4245	0.388489				9.98	0.0729561	8.31663	91.3915	0.00874207
9.99	6.63559	8.32625	91.4973	0.795119				9.99	3.24575	8.327	91.5055	0.388927				9.99	0.0711282	8.325	91.4835	0.00852304
10	6.64067	8.33325	91.5742	0.795729				10	3.2479	8.33437	91.5865	0.389184				10	0.0715256	8.3355	91.5989	0.00857066
10.01	6.64234	8.34175	91.6676	0.795929				10.01	3.24686	8.342	91.6703	0.38906				10.01	0.073274	8.34488	91.7019	0.00878016
10.02	6.64361	8.3505	91.7637	0.796081				10.02	3.24647	8.35063	91.7651	0.389013				10.02	0.0735919	8.35275	91.7885	0.00881826
10.03	6.64798	8.36037	91.8723	0.796605				10.03	3.24988	8.361	91.8791	0.389422				10.03	0.0737508	8.35925	91.8599	0.0088373
10.04	6.65363	8.36925	91.9698	0.797281				10.04	3.25346	8.36988	91.9766	0.389851				10.04	0.0753403	8.366	91.9341	0.00902776
10.05	6.65673	8.37688	92.0536	0.797652				10.05	3.25402	8.37725	92.0577	0.389917				10.05	0.0763734	8.3755	92.0385	0.00915156
10.06	6.65816	8.38438	92.136	0.797824				10.06	3.25449	8.38388	92.1305	0.389974				10.06	0.0750224	8.38613	92.1552	0.00898967
10.07	6.66197	8.39188	92.2184	0.798281				10.07	3.25855	8.39113	92.2102	0.39046				10.07	0.073115	8.39525	92.2555	0.00876112
10.08	6.66769	8.40025	92.3104	0.798966				10.08	3.26228	8.40125	92.3214	0.390908				10.08	0.0729561	8.40263	92.3365	0.00874207
10.09	6.67143	8.41075	92.4258	0.799414				10.09	3.26149	8.41163	92.4355	0.390813				10.09	0.074784	8.40825	92.3984	0.0089611
10.1	6.67326	8.42	92.5275	0.799633				10.1	3.25942	8.42038	92.5316	0.390565				10.1	0.0759761	8.41625	92.4863	0.00910394
10.11	6.67699	8.42788	92.614	0.800081				10.11	3.26188	8.42713	92.6058	0.39086				10.11	0.074625	8.42588	92.592	0.00894205
10.12	6.68295	8.4345	92.6868	0.800795				10.12	3.26721	8.43313	92.6717	0.391498				10.12	0.0729561	8.43575	92.7005	0.00874207
10.13	6.68748	8.44125	92.761	0.801338				10.13	3.26951	8.4415	92.7637	0.391774				10.13	0.0739892	8.44475	92.7995	0.00886587
10.14	6.68947	8.45087	92.8668	0.801576				10.14	3.2692	8.45138	92.8723	0.391736				10.14	0.0760555	8.4515	92.8736	0.00911347
10.15	6.69217	8.46138	92.9821	0.801899				10.15	3.27047	8.46125	92.9808	0.391889				10.15	0.0754197	8.45875	92.9533	0.00903728
10.16	6.69757	8.47038	93.081	0.802547				10.16	3.27436	8.46975	93.0742	0.392355				10.16	0.073274	8.467	93.044	0.00878016
10.17	6.70346	8.47763	93.1607	0.803252				10.17	3.27706	8.476	93.1429	0.392679				10.17	0.0745455	8.47537	93.136	0.00893253
10.18	6.70743	8.4835	93.2253	0.803728				10.18	3.27651	8.48325	93.2225	0.392612				10.18	0.077486	8.48525	93.2445	0.00928488
10.19	6.71029	8.49125	93.3104	0.804071				10.19	3.27603	8.49175	93.3159	0.392555				10.19	0.0772476	8.4945	93.3462	0.00925631
10.2	6.71379	8.50088	93.4162	0.80449				10.2	3.27857	8.50075	93.4148	0.39286				10.2	0.0743866	8.502	93.4286	0.00891349
10.21	6.71816	8.51088	93.5261	0.805013				10.21	3.28183	8.51075	93.5247	0.39325				10.21	0.0739098	8.50962	93.5124	0.00885635
10.22	6.72166	8.51988	93.625	0.805432				10.22	3.28183	8.519	93.6154	0.39325				10.22	0.0758171	8.51688	93.592	0.0090849
10.23	6.72507	8.52663	93.6992	0.805842				10.23	3.2804	8.52625	93.6951	0.393079				10.23	0.0763734	8.52513	93.6827	0.00915156
10.24	6.72984	8.53375	93.7775	0.806413				10.24	3.28207	8.53412	93.7816	0.393279				10.24	0.0749429	8.53575	93.7995	0.00898015
10.25	6.73517	8.542	93.8681	0.807051				10.25	3.28636	8.54175	93.8654	0.393793				10.25	0.0735919	8.54525	93.9038	0.00881826
10.26	6.73882	8.55063	93.9629	0.807489				10.26	3.28898	8.5505	93.9615	0.394107				10.26	0.0739892	8.55312	93.9904	0.00886587
10.27	6.74137	8.5605	94.0714	0.807794				10.27	3.28978	8.561	94.0769	0.394203				10.27	0.0751813	8.55975	94.0632	0.00900871
10.28	6.74589	8.5695	94.1703	0.808337				10.28	3.29184	8.57025	94.1786	0.39445				10.28	0.0754197	8.56638	94.136	0.00903728
10.29	6.75146	8.577	94.2528	0.809004				10.29	3.29518	8.57775	94.261	0.39485				10.29	0.0743071	8.57563	94.2376	0.00890396
10.3	6.75456	8.5845	94.3352	0.809375				10.3	3.29741	8.58425	94.3324	0.395117				10.3	0.0743866	8.58625	94.3544	0.00891349
10.31	6.75638	8.59187	94.4162	0.809594				10.31	3.29804	8.59125	94.4093	0.395193				10.31	0.0764529	8.59538	94.4547	0.00916108
10.32	6.76091	8.60025	94.5082	0.810137				10.32	3.29852	8.601	94.5165	0.39525				10.32	0.0768503	8.60263	94.5344	0.0092087
10.33	6.76711	8.61075	94.6236	0.81088				10.33	3.29971	8.6115	94.6319	0.395393				10.33	0.0755787	8.60838	94.5975	0.00905633
10.34	6.77093	8.62025	94.728	0.811337				10.34	3.30075	8.62013	94.7267	0.395517				10.34	0.0754197	8.61637	94.6854	0.00903728
10.35	6.7718	8.628	94.8132	0.811441				10.35	3.30154	8.62688	94.8008	0.395612				10.35	0.0760555	8.62588	94.7898	0.00911347
10.36	6.77466	8.63438	94.8833	0.811784				10.36	3.30408	8.63312	94.8695	0.395917				10.36	0.0753403	8.63563	94.897	0.00902776
10.37	6.78062	8.64125	94.9588	0.812498				10.37	3.30734	8.64138	94.9602	0.396307				10.37	0.074784	8.64475	94.9973	0.0089611
10.38	6.78579	8.65087	95.0646	0.813117				10.38	3.30854	8.65113	95.0673	0.39645				10.38	0.0764529	8.65125	95.0687	0.00916108
10.39	6.78801	8.66137	95.1799	0.813384				10.39	3.30774	8.66113	95.1772	0.396355				10.39	0.077486	8.6585	95.1484	0.00928488
10.4	6.79032	8.67038	95.2789	0.81366				10.4	3.30933	8.66987	95.2734	0.396545				10.4	0.0759761	8.66688	95.2404	0.00910394
10.41	6.79525	8.6775	95.3572	0.814251				10.41	3.31386	8.67625	95.3434	0.397088				10.41	0.0750224	8.6755	95.3352	0.00898967
10.42	6.80105	8.68337	95.4217	0.814946				10.42	3.3168	8.68337	95.4217	0.397441				10.42	0.0767708	8.68538	95.4437	0.00919917
10.43	6.80391	8.69138	95.5096	0.815289				10.43	3.31632	8.69187	95.5151	0.397383				10.43	0.0784397	8.69425	95.5412	0.00939916
10.44	6.80478	8.701	95.6154	0.815393				10.44	3.31656	8.70087	95.614	0.397412				10.44	0.0778834	8.70188	95.625	0.00933249
10.45	6.80844	8.711	95.7253	0.815831				10.45	3.3203	8.71075	95.7225	0.39786				10.45	0.0764529	8.7095	95.7088	0.00916108
10.46	6.8152	8.71988	95.8228	0.816641				10.46	3.32403	8.71913	95.8146	0.398307				10.46	0.0764529	8.71675	95.7885	0.00916108
10.47	6.82036	8.72638	95.8942	0.81726				10.47	3.32379	8.72663	95.897	0.398278				10.47	0.0778834	8.725	95.8791	0.00933249
10.48	6.82203	8.7335	95.9725	0.81746				10.48	3.32236	8.73413	95.9794	0.398107				10.48	0.0784397	8.73563	95.9959	0.00939916
10.49	6.82433	8.74188	96.0646	0.817736				10.49	3.32522	8.74163	96.0618	0.39845				10.49	0.0768503	8.745	96.0989	0.0092087
10.5	6.82982	8.75063	96.1607	0.818393				10.5	3.33063	8.75063	96.1607	0.399097				10.5	0.0759761	8.75275	96.1841	0.00910394
10.51	6.83474	8.7605	96.2692	0.818984				10.51	3.33285	8.76088	96.2734	0.399364				10.51	0.0781218	8.75938	96.2569	0.00936106
10.52	6.83602	8.76925	96.3654	0.819136				10.52	3.33166	8.76975	96.3709	0.399221				10.52	0.0811418	8.766	96.3297	0.00972294
10.53	6.83761	8.77663	96.4464	0.819326				10.53	3.33206	8.77725	96.4533	0.399269				10.53	0.0807444	8.77562	96.4354	0.00967532
10.54	6.84285	8.7845	96.533	0.819955				10.54	3.33508	8.78388	96.5261	0.399631				10.54	0.0781218	8.78613	96.5508	0.00936106
10.55	6.84937	8.79188	96.614	0.820736				10.55	3.33675	8.79112	96.6058	0.399831				10.55	0.0784397	8.79538	96.6525	0.00939916
10.56	6.85334	8.80025	96.706	0.821212				10.56	3.33587	8.80125	96.717	0.399726				10.56	0.0805855	8.80263	96.7322	0.00965628
10.57	6.85581	8.81088	96.8228	0.821507				10.57	3.33635	8.8115	96.8297	0.399783				10.57	0.0799497	8.8085	96.7967	0.00958009
10.58	6.85922	8.82025	96.9258	0.821917				10.58	3.34009	8.82013	96.9245	0.400231				10.58	0.0763734	8.8165	96.8846	0.00915156
10.59	6.86312	8.82788	97.0096	0.822383				10.59	3.3439	8.82688	96.9986	0.400688				10.59	0.0753403	8.82587	96.9876	0.00902776
10.6	6.8659	8.8345	97.0824	0.822717				10.6	3.34462	8.833	97.0659	0.400773				10.6	0.0782808	8.83563	97.0948	0.00938011
10.61	6.86916	8.84125	97.1566	0.823107				10.61	3.34462	8.84137	97.158	0.400773				10.61	0.080506	8.845	97.1978	0.00964675
10.62	6.87345	8.85063	97.2596	0.823621				10.62	3.34763	8.85138	97.2679	0.401135				10.62	0.0797113	8.85163	97.2706	0.00955152
10.63	6.87782	8.86125	97.3764	0.824145				10.63	3.35137	8.86125	97.3764	0.401583				10.63	0.0788371	8.85875	97.3489	0.00944677
10.64	6.88124	8.87038	97.4767	0.824554				10.64	3.35224	8.86975	97.4698	0.401688				10.64	0.0793139	8.86688	97.4382	0.00950391
10.65	6.8837	8.87763	97.5563	0.82485				10.65	3.35216	8.87575	97.5357	0.401678				10.65	0.0798702	8.8755	97.533	0.00957057
10.66	6.88688	8.8835	97.6209	0.825231				10.66	3.35471	8.883	97.6154	0.401983				10.66	0.079155	8.88525	97.6401	0.00948486
10.67	6.89093	8.89138	97.7074	0.825716				10.67	3.35836	8.89175	97.7115	0.402421				10.67	0.0788371	8.89438	97.7404	0.00944677
10.68	6.89443	8.90087	97.8118	0.826135				10.68	3.35892	8.90087	97.8118	0.402488				10.68	0.0790755	8.90212	97.8255	0.00947534
10.69	6.89753	8.91075	97.9203	0.826507				10.69	3.35773	8.91075	97.9203	0.402345				10.69	0.0789166	8.90963	97.908	0.00945629
10.7	6.90206	8.92	98.022	0.82705				10.7	3.3594	8.919	98.011	0.402545				10.7	0.0786781	8.91688	97.9876	0.00942772
10.71	6.90762	8.9265	98.0934	0.827716				10.71	3.36377	8.92638	98.092	0.403069				10.71	0.0798702	8.925	98.0769	0.00957057
10.72	6.91128	8.93362	98.1717	0.828154				10.72	3.36655	8.934	98.1758	0.403402				10.72	0.0815392	8.93562	98.1937	0.00977055
10.73	6.91215	8.942	98.2637	0.828259				10.73	3.36703	8.94163	98.2596	0.403459				10.73	0.0816186	8.94513	98.2981	0.00978007
10.74	6.91406	8.95063	98.3585	0.828487				10.74	3.36806	8.95063	98.3585	0.403583				10.74	0.0797113	8.95288	98.3832	0.00955152
10.75	6.91875	8.96038	98.4657	0.829049				10.75	3.37076	8.96088	98.4712	0.403907				10.75	0.0785192	8.95937	98.4547	0.00940868
10.76	6.92352	8.96925	98.5632	0.829621				10.76	3.37275	8.96975	98.5687	0.404145				10.76	0.0799497	8.96612	98.5288	0.00958009
10.77	6.9259	8.977	98.6484	0.829906				10.77	3.37259	8.97712	98.6497	0.404126				10.77	0.082016	8.97563	98.6332	0.00982769
10.78	6.92821	8.9845	98.7308	0.830182				10.78	3.37354	8.98387	98.7239	0.40424				10.78	0.0815392	8.98612	98.7486	0.00977055
10.79	6.93353	8.99188	98.8118	0.830821				10.79	3.37728	8.99125	98.8049	0.404687				10.79	0.0801881	8.99538	98.8503	0.00960866
10.8	6.93949	9.00025	98.9039	0.831535				10.8	3.37974	9.00113	98.9135	0.404983				10.8	0.0813007	9.0025	98.9286	0.00974198
10.81	6.94283	9.01063	99.0179	0.831935				10.81	3.37847	9.01137	99.0261	0.40483				10.81	0.0832081	9.00837	98.9931	0.00997053
10.82	6.9445	9.02013	99.1223	0.832135				10.82	3.37815	9.02013	99.1223	0.404792				10.82	0.082016	9.01625	99.0797	0.00982769
10.83	6.9476	9.02775	99.206	0.832506				10.83	3.3826	9.02712	99.1992	0.405325				10.83	0.0793139	9.02587	99.1854	0.00950391
10.84	6.95213	9.03438	99.2788	0.833049				10.84	3.38697	9.03313	99.2651	0.405849				10.84	0.0795523	9.03562	99.2926	0.00953248
10.85	6.95602	9.04112	99.353	0.833516				10.85	3.38578	9.04125	99.3544	0.405706				10.85	0.0823339	9.04475	99.3929	0.00986578
10.86	6.9584	9.05075	99.4588	0.833801				10.86	3.38324	9.05125	99.4643	0.405402				10.86	0.0828107	9.0515	99.467	0.00992292
10.87	6.96119	9.06125	99.5742	0.834135				10.87	3.38491	9.06113	99.5728	0.405602				10.87	0.0799497	9.05875	99.5467	0.00958009
10.88	6.96572	9.07025	99.6731	0.834677				10.88	3.3892	9.06975	99.6676	0.406116				10.88	0.0781218	9.067	99.6374	0.00936106
10.89	6.97001	9.07737	99.7514	0.835192				10.89	3.39111	9.076	99.7363	0.406344				10.89	0.080506	9.07538	99.7294	0.00964675
10.9	6.97311	9.08325	99.8159	0.835563				10.9	3.39031	9.08338	99.8173	0.406249				10.9	0.0829697	9.08512	99.8365	0.00994196
10.91	6.97621	9.09125	99.9038	0.835934				10.91	3.3915	9.09187	99.9107	0.406392				10.91	0.0813802	9.09438	99.9382	0.00975151
10.92	6.98066	9.10088	100.01	0.836468				10.92	3.39619	9.10075	100.008	0.406954				10.92	0.0786781	9.10212	100.023	0.00942772
10.93	6.98455	9.11075	100.118	0.836934				10.93	3.39993	9.11075	100.118	0.407401				10.93	0.0793139	9.10963	100.106	0.00950391
10.94	6.9871	9.11975	100.217	0.837239				10.94	3.39913	9.119	100.209	0.407306				10.94	0.082016	9.11688	100.185	0.00982769
10.95	6.99051	9.12613	100.287	0.837649				10.95	3.39786	9.12637	100.29	0.407154				10.95	0.082016	9.125	100.275	0.00982769
10.96	6.99576	9.13325	100.365	0.838277				10.96	3.40112	9.134	100.374	0.407544				10.96	0.0797113	9.13563	100.391	0.00955152
10.97	7.00108	9.14188	100.46	0.838915				10.97	3.40509	9.1415	100.456	0.40802				10.97	0.0793139	9.14513	100.496	0.00950391
10.98	7.0041	9.1505	100.555	0.839277				10.98	3.40509	9.15062	100.556	0.40802				10.98	0.0813802	9.153	100.582	0.00975151
10.99	7.00657	9.16025	100.662	0.839572				10.99	3.40327	9.16088	100.669	0.407801				10.99	0.0828107	9.1595	100.654	0.00992292
11	7.0107	9.16925	100.761	0.840067				11	3.40462	9.16987	100.768	0.407963				11	0.0819365	9.16612	100.727	0.00981817
11.01	7.01531	9.177	100.846	0.84062				11.01	3.40716	9.17725	100.849	0.408268				11.01	0.0809828	9.17563	100.831	0.00970389
11.02	7.01857	9.1845	100.929	0.84101				11.02	3.40732	9.18388	100.922	0.408287				11.02	0.0824133	9.18613	100.946	0.0098753
11.03	7.02167	9.19187	101.01	0.841382				11.03	3.40668	9.19113	101.001	0.408211				11.03	0.0838439	9.19538	101.048	0.0100467
11.04	7.02659	9.20013	101.1	0.841972				11.04	3.40819	9.20112	101.111	0.408392				11.04	0.0826518	9.20275	101.129	0.00990387
11.05	7.03152	9.21063	101.216	0.842562				11.05	3.41121	9.2115	101.225	0.408754				11.05	0.0813802	9.20863	101.194	0.00975151
11.06	7.03374	9.22	101.319	0.842829				11.06	3.41264	9.22012	101.32	0.408925				11.06	0.0824133	9.21637	101.279	0.0098753
11.07	7.03502	9.22788	101.405	0.842981				11.07	3.41272	9.22687	101.394	0.408935				11.07	0.0834465	9.226	101.385	0.0099991
11.08	7.03867	9.2345	101.478	0.843419				11.08	3.41455	9.23288	101.46	0.409154				11.08	0.0830491	9.23575	101.492	0.00995149
11.09	7.04424	9.24125	101.552	0.844086				11.09	3.41789	9.24125	101.552	0.409554				11.09	0.0825723	9.245	101.593	0.00989435
11.1	7.04813	9.2505	101.654	0.844553				11.1	3.41964	9.25125	101.662	0.409763				11.1	0.083367	9.25163	101.666	0.00998958
11.11	7.04964	9.26113	101.771	0.844734				11.11	3.41932	9.26113	101.771	0.409725				11.11	0.0842412	9.25875	101.745	0.0100943
11.12	7.05266	9.27037	101.872	0.845096				11.12	3.42027	9.26963	101.864	0.409839				11.12	0.0840028	9.26713	101.837	0.0100658
11.13	7.05806	9.27775	101.953	0.845743				11.13	3.42377	9.27575	101.931	0.410258				11.13	0.0838439	9.27562	101.93	0.0100467
11.14	7.06275	9.2835	102.016	0.846305				11.14	3.42623	9.28313	102.012	0.410554				11.14	0.0856718	9.28538	102.037	0.0102657
11.15	7.06402	9.29125	102.102	0.846457				11.15	3.42623	9.29162	102.106	0.410554				11.15	0.0875791	9.2945	102.137	0.0104943
11.16	7.06506	9.30088	102.207	0.846581				11.16	3.42687	9.30063	102.205	0.41063				11.16	0.0864665	9.30213	102.221	0.010361
11.17	7.06943	9.31075	102.316	0.847105				11.17	3.43045	9.31062	102.315	0.411058				11.17	0.0829697	9.30963	102.304	0.00994196
11.18	7.07475	9.31988	102.416	0.847743				11.18	3.43394	9.319	102.407	0.411477				11.18	0.0817776	9.31687	102.383	0.00979912
11.19	7.07801	9.32663	102.49	0.848133				11.19	3.4345	9.32625	102.486	0.411544				11.19	0.0838439	9.32513	102.474	0.0100467
11.2	7.08071	9.33388	102.57	0.848457				11.2	3.43386	9.33388	102.57	0.411468				11.2	0.084877	9.33575	102.591	0.0101705
11.21	7.08588	9.34213	102.661	0.849076				11.21	3.43577	9.3415	102.654	0.411696				11.21	0.0825723	9.34512	102.694	0.00989435
11.22	7.09184	9.3505	102.753	0.84979				11.22	3.43863	9.35037	102.751	0.412039				11.22	0.0807444	9.353	102.78	0.00967532
11.23	7.09526	9.36037	102.861	0.8502				11.23	3.43823	9.36088	102.867	0.411992				11.23	0.0825723	9.3595	102.852	0.00989435
11.24	7.09701	9.3695	102.962	0.850409				11.24	3.43641	9.36975	102.964	0.411772				11.24	0.084877	9.36613	102.924	0.0101705
11.25	7.10106	9.37725	103.047	0.850895				11.25	3.438	9.37738	103.048	0.411963				11.25	0.0836849	9.3755	103.027	0.0100277
11.26	7.10686	9.38475	103.129	0.85159				11.26	3.44276	9.384	103.121	0.412534				11.26	0.0821749	9.38613	103.144	0.00984673
11.27	7.1106	9.39213	103.21	0.852038				11.27	3.44483	9.391	103.198	0.412782				11.27	0.0838439	9.39525	103.245	0.0100467
11.28	7.11258	9.40025	103.299	0.852276				11.28	3.44332	9.40087	103.306	0.412601				11.28	0.0864665	9.40237	103.323	0.010361
11.29	7.11632	9.41088	103.416	0.852723				11.29	3.443	9.41137	103.422	0.412563				11.29	0.0863075	9.40838	103.389	0.0103419
11.3	7.12212	9.42038	103.521	0.853419				11.3	3.44586	9.42025	103.519	0.412906				11.3	0.0840028	9.41625	103.475	0.0100658
11.31	7.12617	9.42825	103.607	0.853904				11.31	3.44833	9.42725	103.596	0.413201				11.31	0.0828107	9.42575	103.58	0.00992292
11.32	7.12744	9.43475	103.679	0.854057				11.32	3.44864	9.43325	103.662	0.413239				11.32	0.0842412	9.4355	103.687	0.0100943
11.33	7.12927	9.44138	103.751	0.854276				11.33	3.44849	9.4415	103.753	0.41322				11.33	0.0860691	9.44488	103.79	0.0103134
11.34	7.13364	9.45063	103.853	0.854799				11.34	3.44976	9.45125	103.86	0.413372				11.34	0.0856718	9.4515	103.863	0.0102657
11.35	7.13809	9.46125	103.97	0.855333				11.35	3.45135	9.46112	103.968	0.413563				11.35	0.0844797	9.4585	103.94	0.0101229
11.36	7.13992	9.47038	104.07	0.855552				11.36	3.45222	9.47	104.066	0.413668				11.36	0.085036	9.46687	104.032	0.0101896
11.37	7.14135	9.4775	104.148	0.855723				11.37	3.45325	9.47638	104.136	0.413791				11.37	0.0865459	9.47537	104.125	0.0103705
11.38	7.14572	9.48338	104.213	0.856247				11.38	3.45564	9.4835	104.214	0.414077				11.38	0.0869433	9.48513	104.232	0.0104181
11.39	7.15129	9.49138	104.301	0.856914				11.39	3.45778	9.492	104.308	0.414334				11.39	0.0868638	9.49437	104.334	0.0104086
11.4	7.15423	9.50075	104.404	0.857266				11.4	3.45802	9.50088	104.405	0.414363				11.4	0.0868638	9.50213	104.419	0.0104086
11.41	7.15597	9.51063	104.512	0.857475				11.41	3.45794	9.51088	104.515	0.414353				11.41	0.0861486	9.50962	104.501	0.0103229
11.42	7.16019	9.51975	104.613	0.85798				11.42	3.46041	9.51925	104.607	0.414648				11.42	0.0852744	9.51675	104.58	0.0102181
11.43	7.16631	9.52638	104.685	0.858713				11.43	3.46351	9.52675	104.69	0.41502				11.43	0.0852744	9.52488	104.669	0.0102181
11.44	7.17068	9.53363	104.765	0.859237				11.44	3.46351	9.53425	104.772	0.41502				11.44	0.0864665	9.53562	104.787	0.010361
11.45	7.17306	9.54188	104.856	0.859523				11.45	3.46255	9.54188	104.856	0.414906				11.45	0.0867049	9.54525	104.893	0.0103895
11.46	7.1768	9.55038	104.949	0.85997				11.46	3.4643	9.55063	104.952	0.415115				11.46	0.0859102	9.553	104.978	0.0102943
11.47	7.18133	9.56038	105.059	0.860513				11.47	3.4674	9.561	105.066	0.415486				11.47	0.0863075	9.55963	105.051	0.0103419
11.48	7.18379	9.56938	105.158	0.860808				11.48	3.46788	9.57	105.165	0.415544				11.48	0.0879765	9.56625	105.124	0.0105419
11.49	7.18419	9.57688	105.24	0.860856				11.49	3.46661	9.57737	105.246	0.415391				11.49	0.0879765	9.5755	105.225	0.0105419
11.5	7.18625	9.5845	105.324	0.861104				11.5	3.46764	9.58413	105.32	0.415515				11.5	0.0856718	9.586	105.341	0.0102657
11.51	7.19158	9.59187	105.405	0.861742				11.51	3.47241	9.59125	105.398	0.416086				11.51	0.0846386	9.59538	105.444	0.0101419
11.52	7.19698	9.60013	105.496	0.862389				11.52	3.47543	9.60113	105.507	0.416448				11.52	0.0856718	9.60263	105.523	0.0102657
11.53	7.2	9.6105	105.61	0.862751				11.53	3.47384	9.6115	105.621	0.416258				11.53	0.0869433	9.6085	105.588	0.0104181
11.54	7.20175	9.62	105.714	0.862961				11.54	3.47257	9.62025	105.717	0.416106				11.54	0.0865459	9.61638	105.674	0.0103705
11.55	7.20525	9.62787	105.801	0.86338				11.55	3.47567	9.62688	105.79	0.416477				11.55	0.085036	9.62575	105.777	0.0101896
11.56	7.20994	9.6345	105.874	0.863941				11.56	3.4798	9.63288	105.856	0.416972				11.56	0.0847975	9.63563	105.886	0.010161
11.57	7.21343	9.64113	105.946	0.86436				11.57	3.48004	9.64138	105.949	0.417001				11.57	0.0871817	9.645	105.989	0.0104467
11.58	7.2159	9.65062	106.051	0.864656				11.58	3.47892	9.65125	106.058	0.416867				11.58	0.0891685	9.65163	106.062	0.0106848
11.59	7.21987	9.66113	106.166	0.865132				11.59	3.48123	9.661	106.165	0.417143				11.59	0.0875791	9.65863	106.139	0.0104943
11.6	7.22536	9.6705	106.269	0.865789				11.6	3.48512	9.66962	106.26	0.41761				11.6	0.0858307	9.667	106.231	0.0102848
11.61	7.22933	9.67763	106.348	0.866265				11.61	3.48655	9.67588	106.328	0.417782				11.61	0.087897	9.6755	106.324	0.0105324
11.62	7.23195	9.6835	106.412	0.866579				11.62	3.48616	9.68313	106.408	0.417734				11.62	0.0908375	9.68525	106.431	0.0108847
11.63	7.23608	9.69138	106.499	0.867075				11.63	3.48759	9.69175	106.503	0.417905				11.63	0.0898043	9.6945	106.533	0.0107609
11.64	7.24141	9.70087	106.603	0.867713				11.64	3.49069	9.70075	106.602	0.418277				11.64	0.0871817	9.7025	106.621	0.0104467
11.65	7.24475	9.7105	106.709	0.868112				11.65	3.49291	9.71063	106.71	0.418543				11.65	0.0879765	9.71	106.703	0.0105419
11.66	7.24618	9.71988	106.812	0.868284				11.66	3.49315	9.71913	106.804	0.418572				11.66	0.0909964	9.71713	106.782	0.0109038
11.67	7.2492	9.72663	106.886	0.868646				11.67	3.49434	9.72663	106.886	0.418715				11.67	0.0918706	9.72513	106.87	0.0110085
11.68	7.25373	9.73362	106.963	0.869189				11.68	3.49808	9.73413	106.968	0.419162				11.68	0.0910759	9.73563	106.985	0.0109133
11.69	7.25667	9.742	107.055	0.869541				11.69	3.50173	9.74163	107.051	0.4196				11.69	0.0912348	9.74525	107.091	0.0109324
11.7	7.25849	9.7505	107.148	0.86976				11.7	3.50245	9.7505	107.148	0.419686				11.7	0.0914733	9.75313	107.177	0.0109609
11.71	7.26223	9.76037	107.257	0.870208				11.71	3.50237	9.76075	107.261	0.419677				11.71	0.0906785	9.75975	107.25	0.0108657
11.72	7.26795	9.7695	107.357	0.870893				11.72	3.50428	9.76975	107.36	0.419905				11.72	0.0899633	9.76638	107.323	0.01078
11.73	7.27193	9.77737	107.444	0.871369				11.73	3.50634	9.7775	107.445	0.420153				11.73	0.089407	9.77562	107.424	0.0107133
11.74	7.27336	9.78488	107.526	0.871541				11.74	3.50634	9.78412	107.518	0.420153				11.74	0.0891685	9.78613	107.54	0.0106848
11.75	7.27518	9.79213	107.606	0.87176				11.75	3.5065	9.79112	107.595	0.420172				11.75	0.089407	9.7955	107.643	0.0107133
11.76	7.27971	9.80025	107.695	0.872303				11.76	3.50896	9.801	107.703	0.420467				11.76	0.0893275	9.803	107.725	0.0107038
11.77	7.28488	9.81075	107.81	0.872922				11.77	3.51183	9.8115	107.819	0.42081				11.77	0.0886122	9.80875	107.788	0.0106181
11.78	7.28734	9.82038	107.916	0.873217				11.78	3.51254	9.82038	107.916	0.420896				11.78	0.0890096	9.81638	107.872	0.0106657
11.79	7.28854	9.82812	108.001	0.87336				11.79	3.51334	9.82737	107.993	0.420991				11.79	0.0895659	9.82587	107.977	0.0107324
11.8	7.29267	9.83475	108.074	0.873855				11.8	3.51747	9.83338	108.059	0.421486				11.8	0.0879765	9.83563	108.084	0.0105419
11.81	7.29903	9.84137	108.147	0.874617				11.81	3.52216	9.84137	108.147	0.422048				11.81	0.0868638	9.84488	108.185	0.0104086
11.82	7.3026	9.85075	108.25	0.875045				11.82	3.52232	9.85125	108.256	0.422067				11.82	0.0891685	9.85163	108.26	0.0106848
11.83	7.30316	9.86125	108.365	0.875112				11.83	3.51993	9.86112	108.364	0.421781				11.83	0.0916322	9.85887	108.339	0.01098
11.84	7.30578	9.8705	108.467	0.875426				11.84	3.52097	9.86988	108.46	0.421905				11.84	0.0904401	9.867	108.429	0.0108371
11.85	7.31119	9.87775	108.547	0.876074				11.85	3.52565	9.87625	108.53	0.422467				11.85	0.0891685	9.87538	108.521	0.0106848
11.86	7.31492	9.88363	108.611	0.876521				11.86	3.52756	9.88363	108.611	0.422695				11.86	0.0909964	9.88525	108.629	0.0109038
11.87	7.31548	9.89138	108.696	0.876588				11.87	3.52565	9.89188	108.702	0.422467				11.87	0.0924269	9.8945	108.731	0.0110752
11.88	7.31754	9.901	108.802	0.876836				11.88	3.52581	9.90075	108.799	0.422486				11.88	0.0904401	9.90225	108.816	0.0108371
11.89	7.32271	9.91075	108.909	0.877455				11.89	3.52955	9.91075	108.909	0.422933				11.89	0.0881354	9.90963	108.897	0.010561
11.9	7.32684	9.92	109.011	0.87795				11.9	3.53169	9.9195	109.005	0.423191				11.9	0.0891685	9.91688	108.977	0.0106848
11.91	7.32907	9.9265	109.082	0.878216				11.91	3.52979	9.92675	109.085	0.422962				11.91	0.092109	9.92512	109.067	0.0110371
11.92	7.3324	9.9335	109.159	0.878616				11.92	3.52836	9.93425	109.168	0.422791				11.92	0.0928243	9.93562	109.183	0.0111228
11.93	7.33773	9.94187	109.251	0.879254				11.93	3.53225	9.94187	109.251	0.423257				11.93	0.0908375	9.94513	109.287	0.0108847
11.94	7.34202	9.95063	109.348	0.879769				11.94	3.53765	9.9505	109.346	0.423905				11.94	0.0891685	9.953	109.374	0.0106848
11.95	7.34409	9.96038	109.455	0.880016				11.95	3.53805	9.961	109.462	0.423952				11.95	0.0904401	9.9595	109.445	0.0108371
11.96	7.34655	9.96925	109.552	0.880311				11.96	3.53559	9.97012	109.562	0.423657				11.96	0.0931422	9.96612	109.518	0.0111609
11.97	7.35132	9.97687	109.636	0.880883				11.97	3.53678	9.97775	109.646	0.4238				11.97	0.0929038	9.9755	109.621	0.0111323
11.98	7.35625	9.9845	109.72	0.881473				11.98	3.54147	9.98413	109.716	0.424362				11.98	0.0908375	9.98613	109.738	0.0108847
11.99	7.35919	9.99188	109.801	0.881826				11.99	3.54354	9.99125	109.794	0.424609				11.99	0.0914733	9.99538	109.839	0.0109609
12	7.36078	10.0002	109.893	0.882016				12	3.54171	10.0013	109.904	0.42439				12	0.0943343	10.0028	109.92	0.0113037
12.01	7.36348	10.0107	110.008	0.88234				12.01	3.54171	10.0117	110.019	0.42439				12.01	0.0943343	10.0085	109.984	0.0113037
12.02	7.36777	10.0201	110.111	0.882854				12.02	3.54521	10.0204	110.114	0.424809				12.02	0.0916322	10.0162	110.069	0.01098
12.03	7.37103	10.028	110.198	0.883244				12.03	3.54846	10.0271	110.188	0.4252				12.03	0.0908375	10.0259	110.175	0.0108847
12.04	7.37246	10.0345	110.269	0.883416				12.04	3.54974	10.0333	110.255	0.425352				12.04	0.0924269	10.0356	110.282	0.0110752
12.05	7.37564	10.0412	110.343	0.883797				12.05	3.55061	10.0415	110.346	0.425457				12.05	0.0920296	10.0449	110.383	0.0110276
12.06	7.3816	10.0509	110.449	0.884511				12.06	3.55323	10.0512	110.453	0.425771				12.06	0.0904401	10.0518	110.459	0.0108371
12.07	7.38589	10.0612	110.563	0.885025				12.07	3.55617	10.0612	110.563	0.426124				12.07	0.0909964	10.059	110.538	0.0109038
12.08	7.38732	10.0704	110.664	0.885197				12.08	3.55736	10.0698	110.657	0.426266				12.08	0.0928243	10.0672	110.629	0.0111228
12.09	7.39002	10.0777	110.745	0.88552				12.09	3.55721	10.076	110.725	0.426247				12.09	0.0931422	10.0755	110.72	0.0111609
12.1	7.39654	10.0835	110.808	0.886301				12.1	3.55879	10.0832	110.805	0.426438				12.1	0.092109	10.0853	110.827	0.0110371
12.11	7.40147	10.0914	110.894	0.886892				12.11	3.56166	10.0917	110.898	0.426781				12.11	0.0917117	10.0945	110.929	0.0109895
12.12	7.40282	10.101	111	0.887054				12.12	3.56309	10.1009	110.999	0.426952				12.12	0.092268	10.1022	111.014	0.0110561
12.13	7.4052	10.1109	111.109	0.887339				12.13	3.56356	10.1109	111.109	0.427009				12.13	0.0928243	10.1096	111.095	0.0111228
12.14	7.41076	10.1199	111.207	0.888006				12.14	3.56658	10.119	111.198	0.427371				12.14	0.0930627	10.1169	111.175	0.0111514
12.15	7.41577	10.1266	111.282	0.888606				12.15	3.57008	10.1263	111.277	0.42779				12.15	0.0935396	10.125	111.264	0.0112085
12.16	7.4172	10.1337	111.36	0.888777				12.16	3.57008	10.134	111.363	0.42779				12.16	0.0945727	10.1356	111.381	0.0113323
12.17	7.418	10.142	111.451	0.888873				12.17	3.56905	10.1416	111.446	0.427666				12.17	0.0952085	10.1454	111.488	0.0114085
12.18	7.42213	10.1505	111.544	0.889368				12.18	3.57072	10.1506	111.545	0.427866				12.18	0.0943343	10.1531	111.573	0.0113037
12.19	7.42809	10.1604	111.653	0.890082				12.19	3.57326	10.161	111.659	0.428171				12.19	0.0929038	10.1598	111.646	0.0111323
12.2	7.43175	10.1695	111.753	0.89052				12.2	3.57358	10.17	111.758	0.428209				12.2	0.0938574	10.1662	111.717	0.0112466
12.21	7.43262	10.1771	111.837	0.890625				12.21	3.57358	10.1774	111.839	0.428209				12.21	0.0957648	10.1756	111.82	0.0114752
12.22	7.43469	10.1847	111.92	0.890872				12.22	3.57644	10.184	111.912	0.428552				12.22	0.0949701	10.1862	111.937	0.0113799
12.23	7.44001	10.1921	112.001	0.89151				12.23	3.58057	10.1913	111.992	0.429047				12.23	0.0925064	10.1955	112.038	0.0110847
12.24	7.44518	10.2004	112.092	0.892129				12.24	3.58208	10.2011	112.1	0.429228				12.24	0.0933011	10.2026	112.117	0.0111799
12.25	7.447	10.2109	112.207	0.892348				12.25	3.58105	10.2116	112.216	0.429104				12.25	0.0964006	10.2085	112.181	0.0115513
12.26	7.44891	10.2203	112.31	0.892577				12.26	3.58081	10.2203	112.31	0.429076				12.26	0.0957648	10.2164	112.268	0.0114752
12.27	7.45439	10.2279	112.394	0.893234				12.27	3.58391	10.227	112.385	0.429447				12.27	0.0925064	10.2257	112.371	0.0110847
12.28	7.46044	10.2344	112.466	0.893958				12.28	3.5874	10.2331	112.452	0.429866				12.28	0.0929038	10.2354	112.477	0.0111323
12.29	7.46322	10.2413	112.541	0.894291				12.29	3.58764	10.2415	112.544	0.429895				12.29	0.0957648	10.2449	112.581	0.0114752
12.3	7.46433	10.2509	112.647	0.894424				12.3	3.58725	10.2513	112.651	0.429847				12.3	0.0964006	10.2515	112.654	0.0115513
12.31	7.46759	10.2614	112.762	0.894815				12.31	3.59066	10.2611	112.76	0.430257				12.31	0.0947317	10.2586	112.732	0.0113514
12.32	7.47132	10.2704	112.861	0.895262				12.32	3.59488	10.2699	112.856	0.430761				12.32	0.0940959	10.2669	112.823	0.0112752
12.33	7.47299	10.2775	112.94	0.895462				12.33	3.59488	10.2761	112.925	0.430761				12.33	0.095129	10.2754	112.916	0.011399
12.34	7.47442	10.2834	113.004	0.895634				12.34	3.59313	10.2833	113.003	0.430552				12.34	0.0964006	10.2852	113.025	0.0115513
12.35	7.47856	10.2914	113.092	0.896129				12.35	3.59503	10.2918	113.096	0.43078				12.35	0.0965595	10.2945	113.126	0.0115704
12.36	7.4838	10.3012	113.201	0.896757				12.36	3.59972	10.3008	113.195	0.431342				12.36	0.0956059	10.3023	113.212	0.0114561
12.37	7.48674	10.3111	113.309	0.89711				12.37	3.60123	10.3108	113.305	0.431523				12.37	0.0955264	10.3097	113.294	0.0114466
12.38	7.48833	10.32	113.407	0.8973				12.38	3.60012	10.3193	113.398	0.43139				12.38	0.0967979	10.3169	113.372	0.011599
12.39	7.49191	10.3264	113.477	0.897729				12.39	3.601	10.3269	113.482	0.431495				12.39	0.0967979	10.325	113.462	0.011599
12.4	7.49739	10.3335	113.555	0.898386				12.4	3.60433	10.3344	113.565	0.431895				12.4	0.0947317	10.3354	113.576	0.0113514
12.41	7.5016	10.3419	113.647	0.898891				12.41	3.6064	10.3417	113.646	0.432142				12.41	0.0943343	10.3451	113.683	0.0113037
12.42	7.50438	10.3506	113.743	0.899224				12.42	3.60576	10.3506	113.743	0.432066				12.42	0.096639	10.353	113.769	0.0115799
12.43	7.50796	10.3605	113.852	0.899653				12.43	3.60616	10.361	113.857	0.432113				12.43	0.0976721	10.3595	113.841	0.0117037
12.44	7.51289	10.3691	113.946	0.900243				12.44	3.60966	10.3699	113.955	0.432533				12.44	0.0964006	10.3661	113.914	0.0115513
12.45	7.51599	10.3767	114.03	0.900614				12.45	3.61307	10.3771	114.034	0.432942				12.45	0.0961622	10.3754	114.015	0.0115228
12.46	7.51638	10.3845	114.115	0.900662				12.46	3.61435	10.3839	114.109	0.433094				12.46	0.0969569	10.386	114.132	0.011618
12.47	7.51766	10.3919	114.196	0.900814				12.47	3.61601	10.3911	114.188	0.433294				12.47	0.0962416	10.3954	114.235	0.0115323
12.48	7.5225	10.4002	114.288	0.901395				12.48	3.61927	10.4012	114.299	0.433685				12.48	0.095129	10.4025	114.313	0.011399
12.49	7.52727	10.4109	114.405	0.901967				12.49	3.62142	10.4116	114.414	0.433942				12.49	0.0962416	10.4084	114.378	0.0115323
12.5	7.5295	10.4204	114.51	0.902233				12.5	3.62174	10.4202	114.508	0.43398				12.5	0.0976721	10.4162	114.464	0.0117037
12.51	7.53132	10.428	114.593	0.902452				12.51	3.62245	10.427	114.582	0.434066				12.51	0.0959237	10.4258	114.569	0.0114942
12.52	7.53609	10.4346	114.666	0.903024				12.52	3.62571	10.433	114.648	0.434456				12.52	0.0933011	10.4355	114.676	0.0111799
12.53	7.54166	10.4414	114.74	0.90369				12.53	3.62921	10.4415	114.742	0.434875				12.53	0.0936985	10.4449	114.779	0.0112276
12.54	7.54436	10.4507	114.843	0.904014				12.54	3.63024	10.4514	114.85	0.434999				12.54	0.0957648	10.4516	114.853	0.0114752
12.55	7.54555	10.4612	114.959	0.904157				12.55	3.63	10.4612	114.959	0.43497				12.55	0.0960032	10.4586	114.93	0.0115037
12.56	7.54913	10.4705	115.06	0.904585				12.56	3.63223	10.4697	115.052	0.435237				12.56	0.095129	10.4669	115.021	0.011399
12.57	7.55469	10.4776	115.139	0.905252				12.57	3.63612	10.4759	115.12	0.435704				12.57	0.0956059	10.4754	115.114	0.0114561
12.58	7.55874	10.4835	115.203	0.905738				12.58	3.63723	10.483	115.198	0.435837				12.58	0.0975927	10.4851	115.221	0.0116942
12.59	7.56001	10.4914	115.29	0.90589				12.59	3.63596	10.4916	115.293	0.435685				12.59	0.0986258	10.4944	115.323	0.011818
12.6	7.56208	10.5009	115.394	0.906138				12.6	3.63787	10.5008	115.393	0.435913				12.6	0.0970364	10.5023	115.409	0.0116275
12.61	7.56717	10.5107	115.503	0.906747				12.61	3.64343	10.5107	115.503	0.43658				12.61	0.0948906	10.5098	115.492	0.0113704
12.62	7.57154	10.52	115.604	0.907271				12.62	3.64582	10.519	115.593	0.436866				12.62	0.0955264	10.517	115.571	0.0114466
12.63	7.57321	10.5266	115.677	0.907471				12.63	3.64343	10.5265	115.676	0.43658				12.63	0.0982284	10.525	115.659	0.0117704
12.64	7.57543	10.5336	115.754	0.907737				12.64	3.64335	10.5341	115.76	0.43657				12.64	0.0978311	10.5356	115.776	0.0117228
12.65	7.5802	10.542	115.846	0.908309				12.65	3.64828	10.5416	115.842	0.437161				12.65	0.0947317	10.5452	115.882	0.0113514
12.66	7.58505	10.5506	115.941	0.90889				12.66	3.65202	10.5505	115.94	0.437608				12.66	0.0943343	10.5531	115.968	0.0113037
12.67	7.58711	10.5605	116.049	0.909137				12.67	3.65146	10.5609	116.054	0.437542				12.67	0.0973543	10.5596	116.04	0.0116656
12.68	7.58894	10.5695	116.148	0.909356				12.68	3.65178	10.5699	116.153	0.43758				12.68	0.0987053	10.5663	116.113	0.0118275
12.69	7.59292	10.5772	116.234	0.909832				12.69	3.65551	10.5774	116.235	0.438027				12.69	0.0962416	10.5756	116.216	0.0115323
12.7	7.59665	10.5847	116.316	0.91028				12.7	3.65949	10.5841	116.309	0.438503				12.7	0.0947317	10.5861	116.331	0.0113514
12.71	7.59904	10.592	116.396	0.910566				12.71	3.6602	10.5911	116.386	0.438589				12.71	0.0970364	10.5954	116.433	0.0116275
12.72	7.60174	10.6003	116.486	0.91089				12.72	3.65925	10.601	116.495	0.438475				12.72	0.0995	10.6028	116.514	0.0119227
12.73	7.60666	10.6107	116.602	0.91148				12.73	3.66132	10.6115	116.61	0.438723				12.73	0.0991027	10.6085	116.577	0.0118751
12.74	7.61104	10.6201	116.705	0.912004				12.74	3.66561	10.6203	116.706	0.439237				12.74	0.0980695	10.6163	116.662	0.0117513
12.75	7.61286	10.6278	116.788	0.912223				12.75	3.66743	10.6273	116.783	0.439456				12.75	0.0983874	10.6258	116.766	0.0117894
12.76	7.61406	10.6344	116.861	0.912366				12.76	3.66561	10.6331	116.848	0.439237				12.76	0.0982284	10.6356	116.875	0.0117704
12.77	7.61787	10.6412	116.937	0.912823				12.77	3.66545	10.6412	116.937	0.439218				12.77	0.0970364	10.6449	116.977	0.0116275
12.78	7.6232	10.6509	117.043	0.913461				12.78	3.6691	10.6512	117.047	0.439656				12.78	0.0967979	10.6516	117.051	0.011599
12.79	7.62661	10.6614	117.158	0.91387				12.79	3.6722	10.6611	117.155	0.440027				12.79	0.09799	10.6589	117.131	0.0117418
12.8	7.62812	10.6705	117.258	0.914051				12.8	3.67236	10.6698	117.25	0.440046				12.8	0.0991027	10.667	117.22	0.0118751
12.81	7.63154	10.6774	117.334	0.914461				12.81	3.67339	10.6761	117.32	0.44017				12.81	0.0988642	10.6754	117.312	0.0118466
12.82	7.63758	10.6832	117.398	0.915184				12.82	3.67713	10.6835	117.401	0.440618				12.82	0.0974337	10.6851	117.419	0.0116751
12.83	7.64171	10.6914	117.488	0.91568				12.83	3.67975	10.6919	117.493	0.440932				12.83	0.0971953	10.6945	117.522	0.0116466
12.84	7.64187	10.7011	117.595	0.915699				12.84	3.67936	10.7007	117.591	0.440884				12.84	0.0980695	10.7021	117.606	0.0117513
12.85	7.64306	10.711	117.703	0.915842				12.85	3.68007	10.7108	117.701	0.44097				12.85	0.0976721	10.7096	117.688	0.0117037
12.86	7.64847	10.7199	117.801	0.916489				12.86	3.68428	10.7194	117.795	0.441475				12.86	0.0962416	10.7169	117.768	0.0115323
12.87	7.65363	10.7263	117.871	0.917108				12.87	3.68746	10.7267	117.876	0.441856				12.87	0.0970364	10.725	117.857	0.0116275
12.88	7.65483	10.7334	117.949	0.917251				12.88	3.68706	10.7341	117.957	0.441808				12.88	0.0998974	10.7355	117.973	0.0119704
12.89	7.65562	10.7419	118.043	0.917346				12.89	3.68683	10.7416	118.04	0.441779				12.89	0.100454	10.7453	118.08	0.012037
12.9	7.66015	10.7506	118.139	0.917889				12.9	3.68993	10.7505	118.137	0.442151				12.9	0.09799	10.7531	118.166	0.0117418
12.91	7.66492	10.7605	118.247	0.91846				12.91	3.69398	10.761	118.253	0.442636				12.91	0.0965595	10.7596	118.238	0.0115704
12.92	7.66683	10.7694	118.345	0.918689				12.92	3.69525	10.7701	118.353	0.442789				12.92	0.0978311	10.7661	118.309	0.0117228
12.93	7.66778	10.777	118.429	0.918803				12.93	3.69477	10.7776	118.435	0.442732				12.93	0.09799	10.7755	118.412	0.0117418
12.94	7.67136	10.7845	118.511	0.919232				12.94	3.69644	10.784	118.505	0.442932				12.94	0.0953674	10.786	118.527	0.0114275
12.95	7.67692	10.7919	118.592	0.919898				12.95	3.69994	10.7911	118.584	0.443351				12.95	0.0938574	10.7954	118.631	0.0112466
12.96	7.68073	10.8004	118.685	0.920355				12.96	3.70145	10.801	118.692	0.443532				12.96	0.0961622	10.8029	118.713	0.0115228
12.97	7.68248	10.8109	118.801	0.920565				12.97	3.70137	10.8116	118.809	0.443522				12.97	0.0986258	10.8086	118.776	0.011818
12.98	7.68526	10.8201	118.903	0.920898				12.98	3.70343	10.8202	118.904	0.44377				12.98	0.0971953	10.8165	118.863	0.0116466
12.99	7.68987	10.8279	118.988	0.92145				12.99	3.70797	10.8271	118.979	0.444312				12.99	0.0943343	10.8257	118.964	0.0113037
13	7.69377	10.8345	119.06	0.921917				13	3.71083	10.8331	119.045	0.444655				13	0.0948906	10.8356	119.073	0.0113704
13.01	7.69599	10.8413	119.135	0.922184				13.01	3.71003	10.8414	119.136	0.44456				13.01	0.0974337	10.8447	119.173	0.0116751
13.02	7.69885	10.8507	119.239	0.922527				13.02	3.70987	10.8513	119.245	0.444541				13.02	0.0978311	10.8515	119.247	0.0117228
13.03	7.70346	10.8613	119.354	0.923079				13.03	3.71329	10.8613	119.354	0.444951				13.03	0.0956059	10.8586	119.326	0.0114561
13.04	7.70775	10.8704	119.455	0.923593				13.04	3.71687	10.8696	119.446	0.445379				13.04	0.0948906	10.8669	119.416	0.0113704
13.05	7.71006	10.8776	119.534	0.923869				13.05	3.71782	10.8759	119.515	0.445493				13.05	0.0971953	10.8752	119.508	0.0116466
13.06	7.71284	10.8834	119.598	0.924203				13.06	3.71846	10.8833	119.596	0.44557				13.06	0.0992616	10.8851	119.617	0.0118942
13.07	7.71721	10.8912	119.684	0.924726				13.07	3.72116	10.8918	119.69	0.445893				13.07	0.0976721	10.8942	119.717	0.0117037
13.08	7.72111	10.901	119.791	0.925193				13.08	3.72346	10.9008	119.788	0.446169				13.08	0.0952085	10.9019	119.801	0.0114085
13.09	7.72238	10.9109	119.9	0.925345				13.09	3.72338	10.9109	119.9	0.44616				13.09	0.0962416	10.9096	119.886	0.0115323
13.1	7.72421	10.9199	119.999	0.925564				13.1	3.72338	10.9191	119.99	0.44616				13.1	0.0991027	10.9169	119.966	0.0118751
13.11	7.72913	10.9265	120.071	0.926155				13.11	3.72585	10.9264	120.07	0.446455				13.11	0.0992616	10.925	120.055	0.0118942
13.12	7.73406	10.9337	120.151	0.926745				13.12	3.72863	10.934	120.154	0.446788				13.12	0.0973543	10.9356	120.172	0.0116656
13.13	7.73509	10.942	120.242	0.926869				13.13	3.73038	10.9416	120.238	0.446998				13.13	0.0973543	10.9452	120.277	0.0116656
13.14	7.73549	10.9506	120.337	0.926917				13.14	3.73181	10.9506	120.337	0.447169				13.14	0.0991027	10.9531	120.364	0.0118751
13.15	7.7397	10.9605	120.445	0.927421				13.15	3.73459	10.9611	120.452	0.447503				13.15	0.0997384	10.9597	120.437	0.0119513
13.16	7.74566	10.9695	120.544	0.928136				13.16	3.73801	10.97	120.549	0.447912				13.16	0.0998974	10.9663	120.508	0.0119704
13.17	7.74852	10.977	120.626	0.928478				13.17	3.73904	10.9775	120.632	0.448036				13.17	0.100295	10.9754	120.609	0.012018
13.18	7.74932	10.9844	120.707	0.928574				13.18	3.73801	10.984	120.703	0.447912				13.18	0.0998974	10.986	120.725	0.0119704
13.19	7.75242	10.9917	120.788	0.928945				13.19	3.73912	10.9911	120.782	0.448046				13.19	0.0984669	10.9954	120.828	0.0117989
13.2	7.7579	11.0002	120.882	0.929602				13.2	3.74325	11.001	120.89	0.448541				13.2	0.0982284	11.0028	120.909	0.0117704
13.21	7.76164	11.0107	120.997	0.93005				13.21	3.74627	11.0115	121.005	0.448903				13.21	0.0998974	11.0085	120.973	0.0119704
13.22	7.76251	11.0203	121.102	0.930155				13.22	3.74603	11.0203	121.102	0.448874				13.22	0.101169	11.0162	121.058	0.0121227
13.23	7.7641	11.028	121.187	0.930345				13.23	3.74667	11.0271	121.177	0.44895				13.23	0.100851	11.0256	121.161	0.0120846
13.24	7.76903	11.0346	121.26	0.930935				13.24	3.75104	11.0331	121.243	0.449474				13.24	0.0995	11.0354	121.268	0.0119227
13.25	7.77396	11.0414	121.334	0.931526				13.25	3.75446	11.0414	121.334	0.449883				13.25	0.0994205	11.0449	121.372	0.0119132
13.26	7.77499	11.0508	121.437	0.93165				13.26	3.75342	11.0511	121.441	0.44976				13.26	0.100692	11.0516	121.446	0.0120656
13.27	7.77507	11.0612	121.552	0.931659				13.27	3.75223	11.061	121.549	0.449617				13.27	0.101487	11.0587	121.525	0.0121608
13.28	7.77952	11.0704	121.653	0.932192				13.28	3.75493	11.0699	121.647	0.449941				13.28	0.100056	11.067	121.615	0.0119894
13.29	7.78572	11.0776	121.732	0.932935				13.29	3.75843	11.0762	121.717	0.450359				13.29	0.0994205	11.0753	121.706	0.0119132
13.3	7.78858	11.0835	121.797	0.933278				13.3	3.75859	11.0835	121.797	0.450379				13.3	0.101725	11.085	121.813	0.0121894
13.31	7.78898	11.0915	121.885	0.933326				13.31	3.757	11.0919	121.889	0.450188				13.31	0.102997	11.0945	121.918	0.0123417
13.32	7.79152	11.1009	121.988	0.93363				13.32	3.75843	11.1007	121.986	0.450359				13.32	0.100692	11.1024	122.004	0.0120656
13.33	7.79669	11.1106	122.095	0.934249				13.33	3.76296	11.1107	122.096	0.450902				13.33	0.0987053	11.1099	122.087	0.0118275
13.34	7.80018	11.1197	122.195	0.934668				13.34	3.76566	11.1192	122.19	0.451226				13.34	0.100692	11.1169	122.164	0.0120656
13.35	7.80185	11.1264	122.268	0.934868				13.35	3.76503	11.1267	122.272	0.45115				13.35	0.102758	11.1249	122.251	0.0123132
13.36	7.80463	11.1336	122.348	0.935202				13.36	3.76566	11.1341	122.353	0.451226				13.36	0.101169	11.1354	122.367	0.0121227
13.37	7.80916	11.1419	122.438	0.935744				13.37	3.77123	11.1416	122.435	0.451893				13.37	0.0992616	11.1451	122.474	0.0118942
13.38	7.8129	11.1505	122.533	0.936192				13.38	3.77607	11.1505	122.533	0.452474				13.38	0.100295	11.153	122.56	0.012018
13.39	7.81449	11.1604	122.642	0.936383				13.39	3.77504	11.1609	122.647	0.45235				13.39	0.10252	11.1596	122.633	0.0122846
13.4	7.81663	11.1692	122.739	0.93664				13.4	3.77321	11.1699	122.746	0.452131				13.4	0.102758	11.1662	122.706	0.0123132
13.41	7.82092	11.1768	122.821	0.937154				13.41	3.77607	11.1774	122.828	0.452474				13.41	0.101089	11.1755	122.808	0.0121132
13.42	7.82545	11.1844	122.905	0.937697				13.42	3.78021	11.184	122.901	0.452969				13.42	0.100056	11.186	122.923	0.0119894
13.43	7.82816	11.1919	122.988	0.93802				13.43	3.78108	11.1911	122.979	0.453074				13.43	0.101089	11.1954	123.026	0.0121132
13.44	7.83014	11.2001	123.078	0.938259				13.44	3.78084	11.201	123.088	0.453045				13.44	0.10252	11.2027	123.107	0.0122846
13.45	7.83364	11.2106	123.194	0.938678				13.45	3.78307	11.2115	123.203	0.453312				13.45	0.102599	11.2086	123.172	0.0122941
13.46	7.83737	11.22	123.297	0.939125				13.46	3.7864	11.2203	123.299	0.453712				13.46	0.101566	11.2165	123.258	0.0121703
13.47	7.83928	11.2279	123.383	0.939354				13.47	3.78744	11.227	123.374	0.453835				13.47	0.101487	11.2259	123.361	0.0121608
13.48	7.84111	11.2345	123.456	0.939573				13.48	3.78728	11.233	123.44	0.453816				13.48	0.102202	11.2356	123.468	0.0122465
13.49	7.84564	11.2413	123.53	0.940116				13.49	3.78847	11.2413	123.53	0.453959				13.49	0.101964	11.245	123.571	0.012218
13.5	7.85033	11.2506	123.633	0.940677				13.5	3.79094	11.2511	123.639	0.454254				13.5	0.101089	11.2516	123.644	0.0121132
13.51	7.85224	11.2613	123.75	0.940906				13.51	3.79276	11.261	123.747	0.454473				13.51	0.101964	11.2587	123.723	0.012218
13.52	7.85391	11.2705	123.852	0.941106				13.52	3.79324	11.2696	123.842	0.454531				13.52	0.103553	11.267	123.813	0.0124084
13.53	7.85875	11.2777	123.931	0.941687				13.53	3.79483	11.2759	123.911	0.454721				13.53	0.103156	11.2755	123.907	0.0123608
13.54	7.86471	11.2836	123.996	0.942401				13.54	3.79793	11.2831	123.99	0.455093				13.54	0.102123	11.2852	124.014	0.012237
13.55	7.86742	11.2915	124.082	0.942725				13.55	3.8	11.2916	124.084	0.45534				13.55	0.103235	11.2944	124.114	0.0123703
13.56	7.86789	11.301	124.187	0.942782				13.56	3.8	11.3006	124.183	0.45534				13.56	0.104189	11.3023	124.201	0.0124846
13.57	7.87099	11.3109	124.295	0.943153				13.57	3.80063	11.3106	124.293	0.455416				13.57	0.102123	11.3097	124.283	0.012237
13.58	7.87648	11.32	124.396	0.94381				13.58	3.80413	11.3193	124.387	0.455835				13.58	0.100136	11.317	124.363	0.0119989
13.59	7.87997	11.3268	124.47	0.944229				13.59	3.80675	11.3266	124.468	0.456149				13.59	0.101169	11.3251	124.452	0.0121227
13.6	7.88077	11.3338	124.547	0.944325				13.6	3.80611	11.3341	124.551	0.456073				13.6	0.10252	11.3356	124.567	0.0122846
13.61	7.88267	11.342	124.637	0.944553				13.61	3.80595	11.3416	124.633	0.456054				13.61	0.101487	11.3451	124.672	0.0121608
13.62	7.88744	11.3507	124.734	0.945125				13.62	3.80969	11.3504	124.729	0.456502				13.62	0.100056	11.3529	124.757	0.0119894
13.63	7.89157	11.3605	124.841	0.94562				13.63	3.81335	11.3609	124.845	0.45694				13.63	0.101487	11.3595	124.83	0.0121608
13.64	7.89301	11.3695	124.94	0.945791				13.64	3.81311	11.3697	124.942	0.456911				13.64	0.104984	11.3661	124.903	0.0125798
13.65	7.89436	11.3773	125.025	0.945953				13.65	3.81192	11.3775	125.027	0.456769				13.65	0.105619	11.3755	125.005	0.012656
13.66	7.89833	11.3848	125.107	0.946429				13.66	3.81501	11.3841	125.1	0.45714				13.66	0.102917	11.3861	125.122	0.0123322
13.67	7.9031	11.392	125.187	0.947001				13.67	3.8197	11.3911	125.177	0.457702				13.67	0.101328	11.3954	125.224	0.0121418
13.68	7.90556	11.4004	125.279	0.947296				13.68	3.8197	11.401	125.286	0.457702				13.68	0.103633	11.4027	125.305	0.0124179
13.69	7.90715	11.4109	125.394	0.947486				13.69	3.81748	11.4115	125.401	0.457435				13.69	0.106891	11.4085	125.368	0.0128084
13.7	7.91089	11.4202	125.497	0.947934				13.7	3.82018	11.4204	125.499	0.457759				13.7	0.105858	11.4162	125.453	0.0126846
13.71	7.91558	11.4279	125.581	0.948496				13.71	3.82654	11.4274	125.576	0.458521				13.71	0.10252	11.4258	125.558	0.0122846
13.72	7.91891	11.4345	125.654	0.948896				13.72	3.82924	11.4334	125.642	0.458845				13.72	0.102758	11.4355	125.665	0.0123132
13.73	7.92193	11.4413	125.728	0.949258				13.73	3.82709	11.4415	125.731	0.458587				13.73	0.106255	11.4448	125.766	0.0127322
13.74	7.92607	11.4509	125.834	0.949753				13.74	3.8259	11.4511	125.837	0.458445				13.74	0.106494	11.4516	125.842	0.0127608
13.75	7.92996	11.4614	125.949	0.950219				13.75	3.8294	11.4612	125.948	0.458864				13.75	0.103156	11.4589	125.922	0.0123608
13.76	7.93123	11.4703	126.047	0.950372				13.76	3.83337	11.47	126.044	0.45934				13.76	0.102202	11.467	126.011	0.0122465
13.77	7.93163	11.4772	126.124	0.950419				13.77	3.83377	11.4763	126.113	0.459387				13.77	0.105381	11.4753	126.102	0.0126274
13.78	7.93449	11.4831	126.188	0.950762				13.78	3.8329	11.4836	126.194	0.459282				13.78	0.106732	11.4851	126.21	0.0127893
13.79	7.9395	11.4913	126.277	0.951362				13.79	3.83536	11.492	126.286	0.459578				13.79	0.104586	11.4944	126.312	0.0125322
13.8	7.94276	11.501	126.385	0.951753				13.8	3.83989	11.5009	126.383	0.460121				13.8	0.102997	11.502	126.396	0.0123417
13.81	7.94339	11.5109	126.493	0.951829				13.81	3.84156	11.5109	126.493	0.460321				13.81	0.103235	11.5095	126.478	0.0123703
13.82	7.9457	11.5199	126.592	0.952105				13.82	3.84013	11.5194	126.587	0.460149				13.82	0.103235	11.5168	126.558	0.0123703
13.83	7.95134	11.5261	126.661	0.952781				13.83	3.84108	11.5266	126.666	0.460263				13.83	0.101964	11.525	126.648	0.012218
13.84	7.95595	11.5333	126.739	0.953333				13.84	3.84522	11.5343	126.75	0.460759				13.84	0.101725	11.5356	126.765	0.0121894
13.85	7.95714	11.5419	126.834	0.953476				13.85	3.848	11.5419	126.834	0.461092				13.85	0.102997	11.5452	126.871	0.0123417
13.86	7.95897	11.5506	126.93	0.953695				13.86	3.84816	11.5506	126.93	0.461111				13.86	0.104189	11.5531	126.957	0.0124846
13.87	7.96461	11.5604	127.037	0.954371				13.87	3.84879	11.561	127.044	0.461187				13.87	0.104189	11.5596	127.029	0.0124846
13.88	7.96978	11.5693	127.135	0.95499				13.88	3.85102	11.57	127.143	0.461454				13.88	0.104189	11.5661	127.1	0.0124846
13.89	7.97073	11.5769	127.218	0.955105				13.89	3.85245	11.5775	127.225	0.461625				13.89	0.104666	11.5756	127.205	0.0125417
13.9	7.97049	11.5844	127.301	0.955076				13.9	3.85253	11.5839	127.295	0.461635				13.9	0.10546	11.5861	127.32	0.012637
13.91	7.97343	11.5917	127.382	0.955428				13.91	3.85332	11.5911	127.375	0.46173				13.91	0.105222	11.5954	127.422	0.0126084
13.92	7.9778	11.6001	127.474	0.955952				13.92	3.85531	11.6013	127.486	0.461968				13.92	0.104427	11.6028	127.503	0.0125132
13.93	7.98043	11.6106	127.589	0.956266				13.93	3.85714	11.6115	127.599	0.462187				13.93	0.105619	11.6085	127.566	0.012656
13.94	7.98225	11.6199	127.691	0.956485				13.94	3.85825	11.62	127.692	0.46232				13.94	0.107686	11.6163	127.651	0.0129036
13.95	7.98551	11.6278	127.777	0.956876				13.95	3.86047	11.6267	127.766	0.462587				13.95	0.107129	11.6259	127.757	0.0128369
13.96	7.99068	11.6344	127.85	0.957495				13.96	3.86405	11.6329	127.834	0.463016				13.96	0.104825	11.6356	127.864	0.0125608
13.97	7.99521	11.6411	127.925	0.958038				13.97	3.86588	11.6412	127.926	0.463235				13.97	0.10546	11.6449	127.966	0.012637
13.98	7.99664	11.6508	128.03	0.958209				13.98	3.86516	11.6512	128.036	0.463149				13.98	0.109116	11.6517	128.041	0.013075
13.99	7.99767	11.6613	128.146	0.958333				13.99	3.86476	11.6611	128.144	0.463101				13.99	0.109593	11.6587	128.118	0.0131322
14	8.00157	11.6704	128.246	0.9588				14	3.86771	11.6698	128.239	0.463454				14	0.106494	11.667	128.209	0.0127608
14.01	8.00657	11.6777	128.327	0.9594				14.01	3.87096	11.676	128.308	0.463844				14.01	0.105222	11.6754	128.301	0.0126084
14.02	8.00983	11.6835	128.39	0.95979				14.02	3.87144	11.6832	128.387	0.463901				14.02	0.107129	11.6852	128.409	0.0128369
14.03	8.01206	11.6914	128.477	0.960057				14.03	3.87136	11.6918	128.481	0.463892				14.03	0.107765	11.6944	128.51	0.0129131
14.04	8.01603	11.701	128.582	0.960533				14.04	3.87383	11.7006	128.578	0.464187				14.04	0.106017	11.702	128.593	0.0127036
14.05	8.0204	11.7109	128.691	0.961057				14.05	3.87692	11.7108	128.69	0.464558				14.05	0.104586	11.7096	128.677	0.0125322
14.06	8.02215	11.72	128.791	0.961266				14.06	3.87772	11.719	128.78	0.464653				14.06	0.106255	11.7169	128.757	0.0127322
14.07	8.02358	11.7266	128.864	0.961437				14.07	3.8778	11.7263	128.86	0.464663				14.07	0.108719	11.7251	128.848	0.0130274
14.08	8.02811	11.7338	128.942	0.96198				14.08	3.88026	11.734	128.945	0.464958				14.08	0.10848	11.7356	128.963	0.0129988
14.09	8.03312	11.742	129.033	0.96258				14.09	3.884	11.7416	129.029	0.465406				14.09	0.106494	11.7453	129.069	0.0127608
14.1	8.03439	11.7506	129.128	0.962733				14.1	3.88598	11.7504	129.125	0.465644				14.1	0.106414	11.7531	129.155	0.0127512
14.11	8.03415	11.7605	129.236	0.962704				14.11	3.88543	11.7607	129.239	0.465577				14.11	0.108322	11.7596	129.227	0.0129798
14.12	8.03741	11.7695	129.335	0.963094				14.12	3.88598	11.7699	129.339	0.465644				14.12	0.108719	11.7662	129.299	0.0130274
14.13	8.04345	11.7771	129.419	0.963818				14.13	3.88932	11.7774	129.422	0.466044				14.13	0.106653	11.7756	129.403	0.0127798
14.14	8.04671	11.7846	129.501	0.964209				14.14	3.89282	11.784	129.495	0.466463				14.14	0.105619	11.7863	129.519	0.012656
14.15	8.04726	11.792	129.582	0.964275				14.15	3.89377	11.7911	129.573	0.466577				14.15	0.107686	11.7954	129.62	0.0129036
14.16	8.04917	11.8003	129.673	0.964504				14.16	3.89409	11.801	129.681	0.466615				14.16	0.109355	11.8025	129.698	0.0131036
14.17	8.05362	11.8109	129.79	0.965037				14.17	3.89735	11.8115	129.797	0.467006				14.17	0.10856	11.8085	129.764	0.0130084
14.18	8.0568	11.8204	129.894	0.965418				14.18	3.90101	11.8204	129.894	0.467444				14.18	0.107527	11.8165	129.852	0.0128846
14.19	8.05775	11.8281	129.979	0.965532				14.19	3.90085	11.8272	129.97	0.467425				14.19	0.108083	11.8257	129.953	0.0129512
14.2	8.06022	11.8346	130.051	0.965828				14.2	3.89941	11.8332	130.036	0.467253				14.2	0.108719	11.8355	130.06	0.0130274
14.21	8.06626	11.8414	130.125	0.966551				14.21	3.90164	11.8415	130.126	0.46752				14.21	0.10848	11.845	130.165	0.0129988
14.22	8.07198	11.8509	130.229	0.967237				14.22	3.90577	11.8511	130.232	0.468015				14.22	0.10856	11.8516	130.238	0.0130084
14.23	8.07404	11.8614	130.345	0.967484				14.23	3.9076	11.861	130.341	0.468234				14.23	0.10848	11.8586	130.315	0.0129988
14.24	8.07524	11.8705	130.445	0.967627				14.24	3.90808	11.87	130.44	0.468291				14.24	0.107129	11.8669	130.405	0.0128369
14.25	8.07921	11.8776	130.523	0.968104				14.25	3.91094	11.8763	130.508	0.468634				14.25	0.106255	11.8754	130.499	0.0127322
14.26	8.08414	11.8834	130.587	0.968694				14.26	3.91483	11.8833	130.585	0.469101				14.26	0.107129	11.8852	130.607	0.0128369
14.27	8.08557	11.8914	130.675	0.968865				14.27	3.91563	11.8919	130.68	0.469196				14.27	0.108322	11.8944	130.707	0.0129798
14.28	8.08493	11.901	130.78	0.968789				14.28	3.91444	11.9008	130.777	0.469053				14.28	0.108322	11.902	130.791	0.0129798
14.29	8.08748	11.9109	130.889	0.969094				14.29	3.91587	11.9106	130.886	0.469224				14.29	0.107924	11.9096	130.875	0.0129322
14.3	8.09375	11.9199	130.988	0.969846				14.3	3.92016	11.9192	130.981	0.469739				14.3	0.108322	11.9168	130.953	0.0129798
14.31	8.0986	11.9262	131.058	0.970427				14.31	3.92238	11.9269	131.065	0.470005				14.31	0.110547	11.9251	131.045	0.0132464
14.32	8.09956	11.9335	131.137	0.970541				14.32	3.92199	11.9344	131.147	0.469958				14.32	0.112454	11.9356	131.161	0.013475
14.33	8.10099	11.9419	131.229	0.970713				14.33	3.92326	11.9419	131.229	0.47011				14.33	0.111421	11.9451	131.265	0.0133512
14.34	8.10599	11.9506	131.326	0.971313				14.34	3.92715	11.9506	131.326	0.470577				14.34	0.108878	11.9529	131.35	0.0130464
14.35	8.11052	11.9606	131.435	0.971856				14.35	3.93009	11.9611	131.441	0.470929				14.35	0.108719	11.9595	131.423	0.0130274
14.36	8.11156	11.9693	131.53	0.971979				14.36	3.93041	11.9701	131.54	0.470967				14.36	0.110626	11.966	131.495	0.0132559
14.37	8.11235	11.9766	131.611	0.972075				14.37	3.93081	11.9776	131.622	0.471015				14.37	0.110388	11.9755	131.599	0.0132274
14.38	8.11624	11.9844	131.696	0.972541				14.38	3.93391	11.9842	131.695	0.471386				14.38	0.107527	11.9861	131.716	0.0128846
14.39	8.12062	11.9917	131.777	0.973065				14.39	3.93724	11.9913	131.772	0.471786				14.39	0.107288	11.9954	131.817	0.012856
14.4	8.1226	12.0002	131.871	0.973303				14.4	3.93748	12.0011	131.881	0.471815				14.4	0.110626	12.0024	131.894	0.0132559
14.41	8.12403	12.0109	131.988	0.973474				14.41	3.93645	12.0115	131.995	0.471691				14.41	0.112693	12.0083	131.959	0.0135035
14.42	8.12753	12.0203	132.091	0.973893				14.42	3.93828	12.0203	132.091	0.47191				14.42	0.110388	12.0162	132.047	0.0132274
14.43	8.1315	12.0279	132.175	0.97437				14.43	3.94265	12.0269	132.164	0.472434				14.43	0.107686	12.0258	132.151	0.0129036
14.44	8.13429	12.0345	132.247	0.974703				14.44	3.94471	12.033	132.231	0.472681				14.44	0.10856	12.0355	132.258	0.0130084
14.45	8.13723	12.0412	132.321	0.975055				14.45	3.94384	12.0414	132.323	0.472577				14.45	0.110626	12.0448	132.36	0.0132559
14.46	8.14112	12.0509	132.427	0.975522				14.46	3.94471	12.0512	132.431	0.472681				14.46	0.110547	12.0514	132.433	0.0132464
14.47	8.14485	12.0614	132.543	0.975969				14.47	3.94893	12.0612	132.541	0.473186				14.47	0.109911	12.0584	132.51	0.0131702
14.48	8.14708	12.0705	132.643	0.976236				14.48	3.95163	12.0698	132.635	0.47351				14.48	0.111024	12.0669	132.603	0.0133036
14.49	8.14939	12.0776	132.721	0.976512				14.49	3.95099	12.0759	132.702	0.473434				14.49	0.112454	12.0755	132.698	0.013475
14.5	8.15328	12.0835	132.786	0.976979				14.5	3.95083	12.0831	132.782	0.473415				14.5	0.112057	12.0853	132.805	0.0134274
14.51	8.15741	12.0914	132.872	0.977474				14.51	3.95314	12.0917	132.876	0.473691				14.51	0.110626	12.0943	132.904	0.0132559
14.52	8.15964	12.101	132.978	0.977741				14.52	3.95552	12.1009	132.977	0.473976				14.52	0.109752	12.1021	132.99	0.0131512
14.53	8.16107	12.1109	133.087	0.977912				14.53	3.95616	12.1107	133.085	0.474053				14.53	0.110388	12.1096	133.073	0.0132274
14.54	8.16456	12.12	133.187	0.978331				14.54	3.95767	12.1191	133.177	0.474234				14.54	0.111421	12.1167	133.151	0.0133512
14.55	8.16957	12.1264	133.257	0.978931				14.55	3.96117	12.1265	133.258	0.474653				14.55	0.110547	12.125	133.242	0.0132464
14.56	8.17243	12.1335	133.335	0.979274				14.56	3.96363	12.134	133.341	0.474948				14.56	0.10848	12.1356	133.359	0.0129988
14.57	8.17299	12.142	133.429	0.979341				14.57	3.96395	12.1416	133.425	0.474986				14.57	0.107765	12.1451	133.463	0.0129131
14.58	8.17513	12.1506	133.523	0.979598				14.58	3.96458	12.1506	133.523	0.475062				14.58	0.108163	12.1531	133.551	0.0129607
14.59	8.1807	12.1604	133.631	0.980264				14.59	3.96776	12.161	133.637	0.475443				14.59	0.107765	12.1595	133.621	0.0129131
14.6	8.18539	12.1694	133.729	0.980826				14.6	3.97118	12.1699	133.735	0.475852				14.6	0.108083	12.1661	133.694	0.0129512
14.61	8.18626	12.1773	133.816	0.980931				14.61	3.97094	12.1775	133.819	0.475824				14.61	0.110229	12.1756	133.798	0.0132083
14.62	8.18729	12.1846	133.897	0.981055				14.62	3.96991	12.1841	133.892	0.4757				14.62	0.111977	12.1862	133.915	0.0134178
14.63	8.19198	12.192	133.978	0.981617				14.63	3.97269	12.1913	133.97	0.476033				14.63	0.110547	12.1954	134.015	0.0132464
14.64	8.19715	12.2004	134.07	0.982235				14.64	3.97698	12.2011	134.078	0.476548				14.64	0.109196	12.2027	134.096	0.0130845
14.65	8.1985	12.2109	134.185	0.982397				14.65	3.97754	12.2115	134.192	0.476614				14.65	0.110944	12.2085	134.159	0.013294
14.66	8.19874	12.2201	134.287	0.982426				14.66	3.97595	12.2204	134.29	0.476424				14.66	0.111977	12.2163	134.245	0.0134178
14.67	8.20231	12.2278	134.371	0.982855				14.67	3.97793	12.2272	134.365	0.476662				14.67	0.109911	12.2257	134.349	0.0131702
14.68	8.20804	12.2342	134.442	0.98354				14.68	3.98334	12.2331	134.43	0.47731				14.68	0.10848	12.2356	134.457	0.0129988
14.69	8.21137	12.2413	134.519	0.98394				14.69	3.98699	12.2413	134.519	0.477748				14.69	0.110388	12.2447	134.558	0.0132274
14.7	8.21233	12.2509	134.625	0.984054				14.7	3.9866	12.2513	134.629	0.4777				14.7	0.112693	12.2515	134.632	0.0135035
14.71	8.21455	12.2615	134.742	0.984321				14.71	3.98644	12.2611	134.738	0.477681				14.71	0.112295	12.2586	134.71	0.0134559
14.72	8.21837	12.2705	134.841	0.984778				14.72	3.98994	12.2698	134.832	0.4781				14.72	0.110149	12.2669	134.801	0.0131988
14.73	8.22059	12.2775	134.918	0.985045				14.73	3.99383	12.2761	134.903	0.478567				14.73	0.109752	12.2754	134.894	0.0131512
14.74	8.22083	12.2833	134.981	0.985073				14.74	3.99407	12.2834	134.982	0.478595				14.74	0.111977	12.2851	135.001	0.0134178
14.75	8.22306	12.2912	135.069	0.98534				14.75	3.99288	12.2918	135.074	0.478452				14.75	0.113646	12.2942	135.102	0.0136178
14.76	8.22759	12.3012	135.179	0.985883				14.76	3.9951	12.3006	135.172	0.478719				14.76	0.111818	12.302	135.187	0.0133988
14.77	8.23132	12.311	135.286	0.98633				14.77	3.99939	12.3108	135.283	0.479233				14.77	0.109911	12.3095	135.269	0.0131702
14.78	8.23291	12.3198	135.382	0.986521				14.78	4.00106	12.3193	135.376	0.479433				14.78	0.111977	12.3169	135.35	0.0134178
14.79	8.23498	12.326	135.451	0.986769				14.79	4.00066	12.3266	135.457	0.479386				14.79	0.114679	12.325	135.44	0.0137416
14.8	8.23895	12.3331	135.529	0.987245				14.8	4.00225	12.3341	135.54	0.479576				14.8	0.113408	12.3355	135.555	0.0135893
14.81	8.24261	12.3417	135.624	0.987683				14.81	4.00575	12.3417	135.624	0.479995				14.81	0.110944	12.3451	135.661	0.013294
14.82	8.24443	12.3506	135.721	0.987902				14.82	4.00686	12.3506	135.721	0.480128				14.82	0.111421	12.353	135.747	0.0133512
14.83	8.24634	12.3605	135.83	0.98813				14.83	4.00551	12.361	135.835	0.479966				14.83	0.113885	12.3595	135.819	0.0136464
14.84	8.2504	12.3691	135.925	0.988616				14.84	4.00623	12.3699	135.933	0.480052				14.84	0.114759	12.3661	135.892	0.0137511
14.85	8.25493	12.3766	136.007	0.989159				14.85	4.01036	12.3774	136.015	0.480547				14.85	0.114123	12.3755	135.995	0.013675
14.86	8.25715	12.3841	136.089	0.989425				14.86	4.01338	12.384	136.088	0.480909				14.86	0.114044	12.386	136.11	0.0136654
14.87	8.25802	12.3916	136.172	0.98953				14.87	4.01314	12.3911	136.166	0.480881				14.87	0.11452	12.3954	136.213	0.0137226
14.88	8.26192	12.4002	136.266	0.989997				14.88	4.01298	12.401	136.275	0.480862				14.88	0.114123	12.4027	136.294	0.013675
14.89	8.26788	12.4108	136.382	0.990711				14.89	4.01584	12.4115	136.39	0.481204				14.89	0.113646	12.4085	136.357	0.0136178
14.9	8.27114	12.4199	136.482	0.991101				14.9	4.01918	12.4202	136.486	0.481604				14.9	0.113249	12.4164	136.444	0.0135702
14.91	8.27114	12.4277	136.569	0.991101				14.91	4.02037	12.427	136.56	0.481747				14.91	0.113408	12.4258	136.547	0.0135893
14.92	8.27328	12.4344	136.642	0.991359				14.92	4.02117	12.433	136.626	0.481842				14.92	0.114044	12.4355	136.654	0.0136654
14.93	8.27877	12.4411	136.716	0.992016				14.93	4.02363	12.4414	136.718	0.482138				14.93	0.114679	12.4449	136.757	0.0137416
14.94	8.2825	12.4509	136.823	0.992463				14.94	4.0257	12.4514	136.828	0.482385				14.94	0.114679	12.4516	136.831	0.0137416
14.95	8.28298	12.4614	136.938	0.99252				14.95	4.02594	12.4612	136.937	0.482414				14.95	0.114759	12.4588	136.909	0.0137511
14.96	8.2852	12.4704	137.037	0.992787				14.96	4.02641	12.4696	137.029	0.482471				14.96	0.115315	12.467	137	0.0138178
14.97	8.29116	12.4775	137.115	0.993501				14.97	4.02904	12.4759	137.098	0.482785				14.97	0.114679	12.4754	137.092	0.0137416
14.98	8.29649	12.4832	137.179	0.994139				14.98	4.03166	12.4831	137.177	0.483099				14.98	0.113646	12.4851	137.199	0.0136178
14.99	8.29736	12.4913	137.266	0.994244				14.99	4.03205	12.4916	137.271	0.483147				14.99	0.114679	12.4944	137.301	0.0137416
15	8.29736	12.501	137.374	0.994244				15	4.03205	12.5006	137.37	0.483147				15	0.116189	12.502	137.385	0.0139226
15.01	8.30062	12.5109	137.482	0.994634				15.01	4.03484	12.5106	137.479	0.48348				15.01	0.114759	12.5098	137.47	0.0137511
15.02	8.30539	12.5199	137.581	0.995206				15.02	4.03953	12.5188	137.569	0.484042				15.02	0.113249	12.517	137.549	0.0135702
15.03	8.30785	12.5264	137.653	0.995501				15.03	4.04096	12.5262	137.651	0.484214				15.03	0.114759	12.5251	137.639	0.0137511
15.04	8.30889	12.5336	137.732	0.995625				15.04	4.03976	12.534	137.736	0.484071				15.04	0.116348	12.5358	137.755	0.0139416
15.05	8.31175	12.5419	137.823	0.995968				15.05	4.04135	12.5416	137.82	0.484261				15.05	0.114679	12.5455	137.863	0.0137416
15.06	8.31588	12.5506	137.919	0.996463				15.06	4.04612	12.5505	137.918	0.484833				15.06	0.112851	12.5533	137.948	0.0135226
15.07	8.31811	12.5605	138.027	0.99673				15.07	4.04859	12.5609	138.032	0.485128				15.07	0.113885	12.5599	138.021	0.0136464
15.08	8.31874	12.5695	138.126	0.996806				15.08	4.04668	12.57	138.132	0.484899				15.08	0.115315	12.5664	138.092	0.0138178
15.09	8.3216	12.577	138.209	0.997148				15.09	4.04565	12.5775	138.214	0.484775				15.09	0.11452	12.5756	138.194	0.0137226
15.1	8.32613	12.5844	138.29	0.997691				15.1	4.04898	12.5841	138.287	0.485175				15.1	0.113646	12.5861	138.309	0.0136178
15.11	8.32939	12.5917	138.371	0.998082				15.11	4.05248	12.5911	138.364	0.485594				15.11	0.114441	12.5955	138.412	0.0137131
15.12	8.3309	12.6003	138.464	0.998263				15.12	4.05184	12.601	138.473	0.485518				15.12	0.116189	12.6029	138.493	0.0139226
15.13	8.33376	12.6107	138.58	0.998605				15.13	4.05049	12.6114	138.587	0.485356				15.13	0.116984	12.6086	138.556	0.0140178
15.14	8.33813	12.6201	138.683	0.999129				15.14	4.05328	12.6203	138.684	0.48569				15.14	0.115156	12.6165	138.643	0.0137988
15.15	8.34099	12.6279	138.768	0.999472				15.15	4.05788	12.6271	138.76	0.486242				15.15	0.112851	12.6258	138.745	0.0135226
15.16	8.34131	12.6342	138.838	0.99951				15.16	4.05947	12.633	138.824	0.486433				15.16	0.113646	12.6356	138.853	0.0136178
15.17	8.34282	12.641	138.912	0.999691				15.17	4.0582	12.6412	138.915	0.48628				15.17	0.116507	12.645	138.956	0.0139606
15.18	8.34799	12.6509	139.021	1.00031				15.18	4.05924	12.651	139.022	0.486404				15.18	0.116507	12.6517	139.03	0.0139606
15.19	8.35347	12.6614	139.136	1.00097				15.19	4.06377	12.6609	139.131	0.486947				15.19	0.114679	12.6587	139.107	0.0137416
15.2	8.35554	12.6704	139.235	1.00121				15.2	4.06671	12.6699	139.229	0.487299				15.2	0.115554	12.667	139.198	0.0138464
15.21	8.35657	12.6775	139.313	1.00134				15.21	4.06607	12.6761	139.298	0.487223				15.21	0.118573	12.6755	139.291	0.0142082
15.22	8.36007	12.6832	139.376	1.00176				15.22	4.06647	12.6832	139.376	0.48727				15.22	0.118812	12.6852	139.398	0.0142368
15.23	8.36396	12.6914	139.466	1.00222				15.23	4.07004	12.6919	139.471	0.487699				15.23	0.11754	12.6946	139.501	0.0140845
15.24	8.3646	12.701	139.571	1.0023				15.24	4.07322	12.7007	139.569	0.48808				15.24	0.118017	12.7025	139.588	0.0141416
15.25	8.36484	12.7109	139.68	1.00233				15.25	4.07291	12.7106	139.677	0.488042				15.25	0.118653	12.71	139.67	0.0142178
15.26	8.36857	12.7197	139.777	1.00278				15.26	4.07243	12.7194	139.773	0.487985				15.26	0.117779	12.717	139.747	0.014113
15.27	8.37374	12.7261	139.848	1.0034				15.27	4.0741	12.7269	139.856	0.488185				15.27	0.116984	12.725	139.835	0.0140178
15.28	8.37612	12.7334	139.927	1.00368				15.28	4.07656	12.7344	139.938	0.48848				15.28	0.118176	12.7355	139.951	0.0141606
15.29	8.3766	12.7417	140.019	1.00374				15.29	4.07783	12.7417	140.019	0.488632				15.29	0.119686	12.7453	140.058	0.0143416
15.3	8.3797	12.7505	140.115	1.00411				15.3	4.07863	12.7504	140.114	0.488728				15.3	0.119686	12.753	140.143	0.0143416
15.31	8.38462	12.7605	140.225	1.0047				15.31	4.08069	12.7609	140.229	0.488975				15.31	0.118971	12.7595	140.214	0.0142559
15.32	8.38733	12.7692	140.321	1.00502				15.32	4.0834	12.77	140.33	0.489299				15.32	0.119209	12.7661	140.287	0.0142844
15.33	8.38709	12.7765	140.401	1.005				15.33	4.08419	12.7776	140.414	0.489394				15.33	0.120083	12.7755	140.39	0.0143892
15.34	8.38772	12.7843	140.486	1.00507				15.34	4.08371	12.7843	140.486	0.489337				15.34	0.120004	12.786	140.505	0.0143797
15.35	8.39194	12.7918	140.569	1.00558				15.35	4.08586	12.7912	140.563	0.489594				15.35	0.118256	12.7954	140.609	0.0141702
15.36	8.39671	12.8003	140.662	1.00615				15.36	4.08959	12.8011	140.672	0.490042				15.36	0.117779	12.8027	140.69	0.014113
15.37	8.39877	12.8108	140.777	1.0064				15.37	4.09031	12.8115	140.786	0.490127				15.37	0.120083	12.8085	140.753	0.0143892
15.38	8.40004	12.8201	140.881	1.00655				15.38	4.08896	12.8205	140.885	0.489965				15.38	0.121673	12.8164	140.839	0.0145796
15.39	8.40306	12.8277	140.964	1.00691				15.39	4.09102	12.8272	140.959	0.490213				15.39	0.119209	12.8259	140.944	0.0142844
15.4	8.40664	12.8344	141.037	1.00734				15.4	4.09508	12.8332	141.025	0.490699				15.4	0.116507	12.8356	141.051	0.0139606
15.41	8.40886	12.841	141.11	1.0076				15.41	4.09571	12.8414	141.114	0.490775				15.41	0.117938	12.8449	141.153	0.0141321
15.42	8.41077	12.8506	141.216	1.00783				15.42	4.09444	12.8513	141.223	0.490623				15.42	0.120878	12.8515	141.225	0.0144844
15.43	8.41459	12.8613	141.332	1.00829				15.43	4.09651	12.8611	141.331	0.49087				15.43	0.119607	12.8585	141.302	0.0143321
15.44	8.41872	12.8704	141.433	1.00879				15.44	4.10088	12.8697	141.426	0.491394				15.44	0.115951	12.867	141.396	0.013894
15.45	8.42063	12.8774	141.51	1.00901				15.45	4.10287	12.8759	141.493	0.491632				15.45	0.116507	12.8754	141.488	0.0139606
15.46	8.42221	12.8833	141.574	1.0092				15.46	4.10191	12.8833	141.574	0.491518				15.46	0.120242	12.8851	141.595	0.0144082
15.47	8.42619	12.8912	141.662	1.00968				15.47	4.10183	12.8916	141.666	0.491508				15.47	0.120878	12.8944	141.696	0.0144844
15.48	8.43112	12.9009	141.768	1.01027				15.48	4.10477	12.9008	141.766	0.491861				15.48	0.118415	12.9023	141.783	0.0141892
15.49	8.43398	12.9108	141.876	1.01061				15.49	4.10867	12.9108	141.876	0.492327				15.49	0.118176	12.9098	141.865	0.0141606
15.5	8.43485	12.9199	141.977	1.01072				15.5	4.1101	12.9191	141.968	0.492499				15.5	0.120719	12.9169	141.944	0.0144654
15.51	8.43692	12.9264	142.048	1.01097				15.51	4.10986	12.9265	142.049	0.49247				15.51	0.121911	12.925	142.033	0.0146082
15.52	8.44041	12.9334	142.125	1.01139				15.52	4.112	12.9341	142.133	0.492727				15.52	0.120004	12.9356	142.15	0.0143797
15.53	8.4428	12.9419	142.218	1.01167				15.53	4.11614	12.9418	142.217	0.493222				15.53	0.118176	12.9451	142.254	0.0141606
15.54	8.44367	12.9506	142.315	1.01178				15.54	4.11653	12.9505	142.313	0.49327				15.54	0.11905	12.9531	142.342	0.0142654
15.55	8.44653	12.9604	142.422	1.01212				15.55	4.11399	12.9609	142.427	0.492965				15.55	0.121752	12.9597	142.415	0.0145892
15.56	8.45146	12.9694	142.521	1.01271				15.56	4.11447	12.9699	142.526	0.493022				15.56	0.122547	12.9663	142.486	0.0146844
15.57	8.45472	12.977	142.604	1.0131				15.57	4.1186	12.9775	142.61	0.493518				15.57	0.12064	12.9755	142.588	0.0144558
15.58	8.45472	12.9845	142.687	1.0131				15.58	4.12122	12.984	142.681	0.493832				15.58	0.119448	12.986	142.703	0.014313
15.59	8.45663	12.9917	142.766	1.01333				15.59	4.12099	12.9911	142.76	0.493803				15.59	0.120878	12.9954	142.806	0.0144844
15.6	8.46283	13.0001	142.859	1.01407				15.6	4.12146	13.001	142.868	0.49386				15.6	0.121435	13.0028	142.887	0.0145511
15.61	8.46839	13.0106	142.974	1.01474				15.61	4.12432	13.0114	142.982	0.494203				15.61	0.120083	13.0086	142.952	0.0143892
15.62	8.46934	13.02	143.077	1.01485				15.62	4.12695	13.0201	143.078	0.494517				15.62	0.119686	13.0164	143.037	0.0143416
15.63	8.46934	13.0277	143.162	1.01485				15.63	4.12758	13.0271	143.155	0.494594				15.63	0.121117	13.0258	143.14	0.014513
15.64	8.47324	13.0343	143.234	1.01532				15.64	4.12885	13.0331	143.221	0.494746				15.64	0.12207	13.0355	143.247	0.0146273
15.65	8.47817	13.0412	143.31	1.01591				15.65	4.13187	13.0412	143.31	0.495108				15.65	0.121037	13.0448	143.349	0.0145035
15.66	8.47952	13.0506	143.414	1.01607				15.66	4.13442	13.051	143.418	0.495413				15.66	0.12064	13.0518	143.426	0.0144558
15.67	8.47904	13.0612	143.53	1.01601				15.67	4.13481	13.061	143.527	0.49546				15.67	0.121673	13.0591	143.507	0.0145796
15.68	8.48174	13.0704	143.631	1.01634				15.68	4.13481	13.0699	143.625	0.49546				15.68	0.12215	13.0671	143.595	0.0146368
15.69	8.4873	13.0777	143.712	1.017				15.69	4.13704	13.0764	143.696	0.495727				15.69	0.121911	13.0754	143.685	0.0146082
15.7	8.4912	13.0835	143.775	1.01747				15.7	4.13934	13.0836	143.776	0.496003				15.7	0.121911	13.0851	143.793	0.0146082
15.71	8.49239	13.0913	143.86	1.01761				15.71	4.13919	13.092	143.868	0.495984				15.71	0.122547	13.0945	143.896	0.0146844
15.72	8.4947	13.1009	143.966	1.01789				15.72	4.13934	13.1007	143.964	0.496003				15.72	0.123104	13.1024	143.982	0.0147511
15.73	8.49946	13.1107	144.074	1.01846				15.73	4.143	13.1107	144.074	0.496441				15.73	0.122706	13.1098	144.063	0.0147034
15.74	8.50296	13.1199	144.175	1.01888				15.74	4.14761	13.1192	144.168	0.496993				15.74	0.122786	13.1169	144.142	0.014713
15.75	8.5036	13.1264	144.246	1.01896				15.75	4.14896	13.1266	144.249	0.497155				15.75	0.123819	13.125	144.231	0.0148368
15.76	8.50479	13.1336	144.326	1.0191				15.76	4.14801	13.1342	144.332	0.497041				15.76	0.124375	13.1355	144.346	0.0149034
15.77	8.50884	13.1419	144.416	1.01958				15.77	4.14904	13.1419	144.416	0.497165				15.77	0.122944	13.1454	144.455	0.014732
15.78	8.51321	13.1504	144.51	1.02011				15.78	4.15206	13.1504	144.51	0.497527				15.78	0.120878	13.1534	144.543	0.0144844
15.79	8.51552	13.1602	144.618	1.02038				15.79	4.15389	13.1609	144.625	0.497746				15.79	0.121276	13.1598	144.613	0.014532
15.8	8.51695	13.1692	144.717	1.02056				15.8	4.15333	13.1701	144.727	0.497679				15.8	0.124137	13.1662	144.684	0.0148749
15.81	8.52005	13.177	144.802	1.02093				15.81	4.15389	13.1779	144.812	0.497746				15.81	0.124613	13.1755	144.786	0.014932
15.82	8.52354	13.1845	144.885	1.02135				15.82	4.15746	13.1844	144.883	0.498174				15.82	0.122468	13.1861	144.903	0.0146749
15.83	8.52529	13.1919	144.966	1.02156				15.83	4.16056	13.1914	144.96	0.498546				15.83	0.12215	13.1955	145.005	0.0146368
15.84	8.52593	13.2001	145.056	1.02163				15.84	4.15993	13.201	145.066	0.498469				15.84	0.125249	13.2029	145.087	0.0150082
15.85	8.52863	13.2106	145.172	1.02196				15.85	4.15929	13.2115	145.181	0.498393				15.85	0.12668	13.2086	145.15	0.0151796
15.86	8.53316	13.2201	145.276	1.0225				15.86	4.16255	13.2204	145.279	0.498784				15.86	0.124216	13.2165	145.236	0.0148844
15.87	8.53642	13.228	145.363	1.02289				15.87	4.16652	13.2274	145.356	0.49926				15.87	0.121752	13.2259	145.339	0.0145892
15.88	8.53769	13.2344	145.433	1.02304				15.88	4.16708	13.2334	145.422	0.499327				15.88	0.122944	13.2356	145.446	0.014732
15.89	8.54039	13.2411	145.507	1.02337				15.89	4.16668	13.2415	145.511	0.499279				15.89	0.124772	13.2447	145.547	0.014951
15.9	8.54444	13.2508	145.613	1.02385				15.9	4.16954	13.2511	145.617	0.499622				15.9	0.124137	13.2513	145.618	0.0148749
15.91	8.54675	13.2613	145.728	1.02413				15.91	4.17352	13.261	145.725	0.500098				15.91	0.122944	13.2585	145.698	0.014732
15.92	8.54691	13.2705	145.83	1.02415				15.92	4.17495	13.2699	145.823	0.500269				15.92	0.123739	13.2669	145.79	0.0148272
15.93	8.54882	13.2779	145.911	1.02437				15.93	4.17495	13.2762	145.893	0.500269				15.93	0.124931	13.2755	145.885	0.0149701
15.94	8.55358	13.2836	145.974	1.02495				15.94	4.17725	13.2833	145.97	0.500545				15.94	0.124613	13.2854	145.993	0.014932
15.95	8.55708	13.2914	146.059	1.02536				15.95	4.18091	13.2918	146.063	0.500984				15.95	0.123819	13.2944	146.092	0.0148368
15.96	8.55724	13.301	146.165	1.02538				15.96	4.18218	13.3006	146.161	0.501136				15.96	0.123819	13.3019	146.175	0.0148368
15.97	8.55811	13.3109	146.273	1.02549				15.97	4.1817	13.3106	146.271	0.501079				15.97	0.124375	13.3094	146.257	0.0149034
15.98	8.56241	13.32	146.374	1.026				15.98	4.18282	13.3191	146.364	0.501212				15.98	0.125249	13.3169	146.339	0.0150082
15.99	8.5671	13.3265	146.445	1.02656				15.99	4.186	13.3265	146.445	0.501593				15.99	0.125805	13.3251	146.43	0.0150748
16	8.56852	13.3338	146.525	1.02674				16	4.18711	13.3341	146.529	0.501726				16	0.125011	13.3356	146.545	0.0149796
16.01	8.56852	13.342	146.615	1.02674				16.01	4.18623	13.3416	146.611	0.501622				16.01	0.124772	13.345	146.648	0.014951
16.02	8.57139	13.3506	146.71	1.02708				16.02	4.18703	13.3504	146.707	0.501717				16.02	0.125567	13.3528	146.734	0.0150463
16.03	8.57663	13.3605	146.819	1.02771				16.03	4.191	13.3607	146.821	0.502193				16.03	0.126203	13.3594	146.806	0.0151225
16.04	8.58013	13.3695	146.918	1.02813				16.04	4.19434	13.3699	146.922	0.502593				16.04	0.126282	13.3661	146.881	0.015132
16.05	8.58108	13.377	147	1.02824				16.05	4.19489	13.3773	147.003	0.50266				16.05	0.12668	13.3756	146.985	0.0151796
16.06	8.58323	13.3846	147.084	1.0285				16.06	4.19553	13.3839	147.076	0.502736				16.06	0.125965	13.3861	147.1	0.0150939
16.07	8.58847	13.392	147.165	1.02913				16.07	4.19903	13.391	147.154	0.503155				16.07	0.124137	13.3953	147.201	0.0148749
16.08	8.59245	13.4004	147.257	1.0296				16.08	4.20237	13.4009	147.262	0.503555				16.08	0.124613	13.4025	147.28	0.014932
16.09	8.593	13.4109	147.372	1.02967				16.09	4.20165	13.4114	147.378	0.503469				16.09	0.127474	13.4085	147.346	0.0152748
16.1	8.59412	13.4204	147.477	1.0298				16.1	4.19958	13.4204	147.477	0.503221				16.1	0.127713	13.4165	147.434	0.0153034
16.11	8.59841	13.4281	147.562	1.03032				16.11	4.20189	13.4273	147.552	0.503498				16.11	0.124375	13.4258	147.536	0.0149034
16.12	8.6027	13.4346	147.633	1.03083				16.12	4.20801	13.4332	147.618	0.504231				16.12	0.122944	13.4355	147.643	0.014732
16.13	8.60453	13.4414	147.707	1.03105				16.13	4.21079	13.4415	147.709	0.504564				16.13	0.125249	13.4449	147.746	0.0150082
16.14	8.60643	13.4507	147.81	1.03128				16.14	4.20952	13.4512	147.816	0.504412				16.14	0.126203	13.4518	147.821	0.0151225
16.15	8.61049	13.4612	147.926	1.03176				16.15	4.21055	13.4611	147.925	0.504536				16.15	0.123819	13.4588	147.898	0.0148368
16.16	8.61446	13.4704	148.026	1.03224				16.16	4.21564	13.47	148.022	0.505145				16.16	0.122468	13.4669	147.988	0.0146749
16.17	8.61589	13.4775	148.104	1.03241				16.17	4.21898	13.4764	148.092	0.505545				16.17	0.124534	13.4754	148.081	0.0149225
16.18	8.61653	13.4834	148.169	1.03249				16.18	4.21834	13.4834	148.169	0.505469				16.18	0.127713	13.4853	148.19	0.0153034
16.19	8.61923	13.4914	148.257	1.03281				16.19	4.21794	13.4919	148.262	0.505421				16.19	0.128508	13.4945	148.291	0.0153986
16.2	8.62273	13.5009	148.361	1.03323				16.2	4.22128	13.5008	148.36	0.505821				16.2	0.12668	13.5023	148.376	0.0151796
16.21	8.62439	13.5107	148.47	1.03343				16.21	4.22478	13.5107	148.47	0.50624				16.21	0.125249	13.5098	148.459	0.0150082
16.22	8.62543	13.5199	148.57	1.03355				16.22	4.22494	13.5192	148.563	0.506259				16.22	0.1266	13.517	148.538	0.0151701
16.23	8.62892	13.5264	148.642	1.03397				16.23	4.22414	13.5267	148.646	0.506164				16.23	0.127872	13.525	148.626	0.0153224
16.24	8.63385	13.5335	148.72	1.03456				16.24	4.22597	13.5344	148.729	0.506383				16.24	0.1266	13.5355	148.742	0.0151701
16.25	8.63663	13.5419	148.812	1.0349				16.25	4.22947	13.5419	148.812	0.506802				16.25	0.12517	13.5452	148.849	0.0149987
16.26	8.63735	13.5505	148.907	1.03498				16.26	4.23114	13.5506	148.908	0.507002				16.26	0.126282	13.5531	148.935	0.015132
16.27	8.63997	13.5604	149.015	1.0353				16.27	4.23114	13.5611	149.023	0.507002				16.27	0.128031	13.5597	149.008	0.0153415
16.28	8.64466	13.5693	149.113	1.03586				16.28	4.23273	13.5701	149.122	0.507193				16.28	0.127872	13.5663	149.08	0.0153224
16.29	8.64744	13.577	149.198	1.03619				16.29	4.23582	13.5775	149.203	0.507564				16.29	0.12668	13.5755	149.181	0.0151796
16.3	8.64744	13.5845	149.28	1.03619				16.3	4.23733	13.5843	149.277	0.507745				16.3	0.127236	13.5861	149.298	0.0152463
16.31	8.64919	13.5917	149.36	1.0364				16.31	4.23765	13.5913	149.354	0.507783				16.31	0.128746	13.5954	149.4	0.0154272
16.32	8.6542	13.6001	149.452	1.037				16.32	4.2398	13.6011	149.463	0.50804				16.32	0.129064	13.6026	149.479	0.0154653
16.33	8.65833	13.6106	149.567	1.0375				16.33	4.24385	13.6115	149.577	0.508526				16.33	0.128667	13.6085	149.544	0.0154177
16.34	8.65928	13.62	149.67	1.03761				16.34	4.24552	13.6203	149.673	0.508726				16.34	0.1297	13.6164	149.631	0.0155415
16.35	8.66032	13.6278	149.755	1.03774				16.35	4.24528	13.6271	149.749	0.508697				16.35	0.131369	13.6259	149.735	0.0157414
16.36	8.66445	13.6344	149.828	1.03823				16.36	4.24679	13.6331	149.815	0.508878				16.36	0.13121	13.6356	149.842	0.0157224
16.37	8.66874	13.6411	149.903	1.03874				16.37	4.24989	13.6412	149.904	0.50925				16.37	0.129938	13.645	149.945	0.01557
16.38	8.67041	13.6506	150.007	1.03894				16.38	4.25132	13.6511	150.012	0.509421				16.38	0.130335	13.6516	150.018	0.0156176
16.39	8.67144	13.6613	150.124	1.03907				16.39	4.25108	13.6611	150.122	0.509392				16.39	0.131766	13.6586	150.095	0.0157891
16.4	8.67502	13.6705	150.225	1.0395				16.4	4.25235	13.6698	150.217	0.509545				16.4	0.13121	13.667	150.187	0.0157224
16.41	8.67923	13.6776	150.304	1.04				16.41	4.25545	13.6759	150.284	0.509916				16.41	0.1297	13.6755	150.28	0.0155415
16.42	8.68114	13.6835	150.368	1.04023				16.42	4.25728	13.6832	150.365	0.510135				16.42	0.129938	13.6852	150.387	0.01557
16.43	8.68217	13.6914	150.455	1.04035				16.43	4.25688	13.6918	150.459	0.510087				16.43	0.131607	13.6945	150.489	0.01577
16.44	8.68567	13.701	150.56	1.04077				16.44	4.2572	13.7007	150.558	0.510126				16.44	0.131766	13.7024	150.576	0.0157891
16.45	8.69036	13.7108	150.668	1.04133				16.45	4.2607	13.7106	150.666	0.510545				16.45	0.129461	13.7099	150.658	0.0155129
16.46	8.69354	13.7199	150.768	1.04172				16.46	4.26491	13.719	150.758	0.511049				16.46	0.12811	13.7171	150.738	0.015351
16.47	8.69529	13.7264	150.839	1.04193				16.47	4.26555	13.7265	150.841	0.511126				16.47	0.130733	13.7251	150.826	0.0156653
16.48	8.69783	13.7335	150.918	1.04223				16.48	4.2634	13.734	150.923	0.510868				16.48	0.133594	13.7357	150.942	0.0160081
16.49	8.70132	13.742	151.011	1.04265				16.49	4.26427	13.7416	151.007	0.510973				16.49	0.132561	13.7453	151.047	0.0158843
16.5	8.70403	13.7506	151.106	1.04297				16.5	4.26873	13.7505	151.104	0.511506				16.5	0.129938	13.7531	151.133	0.01557
16.51	8.70577	13.7604	151.213	1.04318				16.51	4.27127	13.7607	151.217	0.511811				16.51	0.130733	13.7596	151.205	0.0156653
16.52	8.70848	13.7695	151.313	1.04351				16.52	4.27087	13.7698	151.316	0.511764				16.52	0.132958	13.7662	151.277	0.0159319
16.53	8.71237	13.7774	151.4	1.04397				16.53	4.2719	13.7774	151.4	0.511887				16.53	0.13113	13.7758	151.382	0.0157129
16.54	8.71484	13.7848	151.481	1.04427				16.54	4.27596	13.7841	151.474	0.512373				16.54	0.127872	13.7863	151.497	0.0153224
16.55	8.71571	13.7921	151.562	1.04437				16.55	4.27922	13.7911	151.551	0.512763				16.55	0.128746	13.7955	151.599	0.0154272
16.56	8.71762	13.8004	151.653	1.0446				16.56	4.27906	13.801	151.659	0.512744				16.56	0.132561	13.8029	151.68	0.0158843
16.57	8.72143	13.8109	151.768	1.04506				16.57	4.27882	13.8115	151.775	0.512716				16.57	0.133594	13.8086	151.743	0.0160081
16.58	8.72461	13.8204	151.872	1.04544				16.58	4.28168	13.8204	151.872	0.513059				16.58	0.130971	13.8165	151.83	0.0156938
16.59	8.72541	13.8281	151.957	1.04553				16.59	4.28502	13.8274	151.949	0.513459				16.59	0.129302	13.8259	151.933	0.0154938
16.6	8.72668	13.8347	152.03	1.04569				16.6	4.28549	13.8332	152.014	0.513516				16.6	0.130177	13.8358	152.041	0.0155986
16.61	8.73089	13.8414	152.103	1.04619				16.61	4.28462	13.8414	152.103	0.513411				16.61	0.131607	13.845	152.143	0.01577
16.62	8.7355	13.8509	152.207	1.04674				16.62	4.28645	13.8511	152.21	0.51363				16.62	0.131369	13.8516	152.216	0.0157414
16.63	8.73653	13.8614	152.323	1.04687				16.63	4.28995	13.8611	152.32	0.514049				16.63	0.130097	13.8588	152.294	0.0155891
16.64	8.73669	13.8706	152.425	1.04689				16.64	4.29161	13.8697	152.415	0.514249				16.64	0.130335	13.867	152.385	0.0156176
16.65	8.74035	13.8778	152.503	1.04732				16.65	4.29161	13.8761	152.485	0.514249				16.65	0.132799	13.8755	152.478	0.0159129
16.66	8.74591	13.8836	152.567	1.04799				16.66	4.29249	13.8835	152.566	0.514354				16.66	0.133832	13.8852	152.585	0.0160367
16.67	8.74837	13.8915	152.654	1.04829				16.67	4.29495	13.8919	152.658	0.514649				16.67	0.132561	13.8945	152.687	0.0158843
16.68	8.74869	13.9011	152.76	1.04832				16.68	4.29718	13.9008	152.755	0.514916				16.68	0.132243	13.9021	152.771	0.0158462
16.69	8.75211	13.9109	152.867	1.04873				16.69	4.29877	13.9108	152.865	0.515106				16.69	0.133673	13.9096	152.853	0.0160176
16.7	8.75831	13.92	152.967	1.04948				16.7	4.30044	13.9194	152.96	0.515306				16.7	0.13423	13.9169	152.933	0.0160843
16.71	8.7618	13.9264	153.037	1.0499				16.71	4.30234	13.9266	153.04	0.515535				16.71	0.133832	13.9251	153.023	0.0160367
16.72	8.76077	13.9335	153.115	1.04977				16.72	4.30354	13.9343	153.124	0.515677				16.72	0.134707	13.9358	153.14	0.0161414
16.73	8.76037	13.9419	153.207	1.04972				16.73	4.30457	13.9419	153.207	0.515801				16.73	0.135899	13.9451	153.243	0.0162843
16.74	8.76403	13.9506	153.304	1.05016				16.74	4.30727	13.9506	153.304	0.516125				16.74	0.135263	13.9529	153.328	0.0162081
16.75	8.7688	13.9605	153.412	1.05073				16.75	4.31061	13.9611	153.419	0.516525				16.75	0.134071	13.9594	153.4	0.0160652
16.76	8.77063	13.9691	153.507	1.05095				16.76	4.3122	13.9703	153.519	0.516715				16.76	0.134707	13.9661	153.474	0.0161414
16.77	8.7711	13.9766	153.589	1.05101				16.77	4.3118	13.9778	153.602	0.516668				16.77	0.135263	13.9756	153.578	0.0162081
16.78	8.7742	13.9841	153.672	1.05138				16.78	4.31307	13.9842	153.673	0.51682				16.78	0.134309	13.9861	153.694	0.0160938
16.79	8.77969	13.9917	153.755	1.05204				16.79	4.31712	13.9913	153.75	0.517306				16.79	0.133196	13.9954	153.795	0.0159605
16.8	8.78278	14.0002	153.849	1.05241				16.8	4.31999	14.0011	153.859	0.517649				16.8	0.133435	14.0025	153.874	0.015989
16.81	8.78262	14.0107	153.964	1.05239				16.81	4.31919	14.0116	153.974	0.517554				16.81	0.135501	14.0084	153.938	0.0162366
16.82	8.78429	14.0199	154.065	1.05259				16.82	4.31832	14.0203	154.069	0.517449				16.82	0.136932	14.0162	154.025	0.016408
16.83	8.78962	14.0276	154.15	1.05323				16.83	4.32102	14.027	154.143	0.517773				16.83	0.136057	14.0259	154.131	0.0163033
16.84	8.79367	14.0344	154.224	1.05371				16.84	4.3246	14.0331	154.21	0.518201				16.84	0.134627	14.0356	154.238	0.0161319
16.85	8.79494	14.0411	154.298	1.05387				16.85	4.32491	14.0415	154.302	0.518239				16.85	0.135024	14.0449	154.339	0.0161795
16.86	8.79717	14.0509	154.405	1.05413				16.86	4.32388	14.0512	154.409	0.518115				16.86	0.136057	14.0515	154.412	0.0163033
16.87	8.80154	14.0614	154.521	1.05466				16.87	4.32595	14.0611	154.518	0.518363				16.87	0.134627	14.0587	154.492	0.0161319
16.88	8.80464	14.0704	154.62	1.05503				16.88	4.32992	14.0696	154.611	0.518839				16.88	0.132402	14.0671	154.584	0.0158652
16.89	8.80559	14.0775	154.698	1.05514				16.89	4.33111	14.0759	154.68	0.518982				16.89	0.133594	14.0755	154.676	0.0160081
16.9	8.80806	14.0832	154.761	1.05544				16.9	4.32984	14.0832	154.761	0.51883				16.9	0.136375	14.0853	154.783	0.0163414
16.91	8.81267	14.0913	154.849	1.05599				16.91	4.33056	14.0917	154.854	0.518915				16.91	0.136057	14.0945	154.885	0.0163033
16.92	8.81616	14.101	154.956	1.05641				16.92	4.33509	14.1009	154.955	0.519458				16.92	0.133435	14.1021	154.968	0.015989
16.93	8.8168	14.1107	155.063	1.05649				16.93	4.33898	14.1109	155.065	0.519925				16.93	0.133435	14.1098	155.052	0.015989
16.94	8.81735	14.1197	155.162	1.05655				16.94	4.33962	14.119	155.154	0.520001				16.94	0.13574	14.117	155.132	0.0162652
16.95	8.82022	14.1264	155.235	1.0569				16.95	4.34001	14.1261	155.232	0.520049				16.95	0.136296	14.1251	155.221	0.0163319
16.96	8.82332	14.1335	155.313	1.05727				16.96	4.34264	14.1339	155.317	0.520363				16.96	0.134627	14.1357	155.338	0.0161319
16.97	8.82419	14.1419	155.405	1.05737				16.97	4.34494	14.1416	155.403	0.520639				16.97	0.134468	14.1454	155.444	0.0161128
16.98	8.82514	14.1505	155.5	1.05749				16.98	4.34431	14.1506	155.501	0.520563				16.98	0.136057	14.1532	155.53	0.0163033
16.99	8.82952	14.1604	155.609	1.05801				16.99	4.34375	14.1609	155.614	0.520496				16.99	0.137091	14.1598	155.602	0.0164271
17	8.83571	14.1694	155.707	1.05875				17	4.34677	14.1699	155.713	0.520858				17	0.137488	14.1664	155.675	0.0164747
17.01	8.83841	14.1769	155.79	1.05908				17.01	4.35074	14.1774	155.795	0.521334				17.01	0.137568	14.1756	155.776	0.0164842
17.02	8.83738	14.1844	155.872	1.05895				17.02	4.35193	14.184	155.868	0.521477				17.02	0.137488	14.1862	155.893	0.0164747
17.03	8.83873	14.1919	155.955	1.05911				17.03	4.35154	14.1911	155.946	0.521429				17.03	0.137568	14.1955	155.995	0.0164842
17.04	8.84326	14.2004	156.048	1.05966				17.04	4.3532	14.2011	156.056	0.521629				17.04	0.137091	14.2027	156.074	0.0164271
17.05	8.84573	14.2108	156.162	1.05995				17.05	4.3567	14.2116	156.172	0.522048				17.05	0.136057	14.2086	156.139	0.0163033
17.06	8.84509	14.2201	156.265	1.05988				17.06	4.35869	14.2204	156.268	0.522286				17.06	0.13574	14.2164	156.224	0.0162652
17.07	8.84676	14.2278	156.349	1.06008				17.07	4.35869	14.2271	156.342	0.522286				17.07	0.137091	14.2257	156.327	0.0164271
17.08	8.85232	14.2344	156.422	1.06074				17.08	4.36012	14.2331	156.408	0.522458				17.08	0.137806	14.2355	156.434	0.0165128
17.09	8.85661	14.2411	156.496	1.06126				17.09	4.36306	14.2414	156.499	0.52281				17.09	0.137488	14.2449	156.537	0.0164747
17.1	8.85709	14.2508	156.602	1.06131				17.1	4.36489	14.2513	156.607	0.523029				17.1	0.13717	14.2515	156.61	0.0164366
17.11	8.85789	14.2614	156.718	1.06141				17.11	4.36489	14.2611	156.716	0.523029				17.11	0.137329	14.2585	156.687	0.0164557
17.12	8.86122	14.2704	156.817	1.06181				17.12	4.36592	14.2699	156.812	0.523153				17.12	0.13566	14.2669	156.779	0.0162557
17.13	8.86472	14.2775	156.896	1.06223				17.13	4.36894	14.2761	156.881	0.523515				17.13	0.134071	14.2754	156.872	0.0160652
17.14	8.86671	14.2834	156.96	1.06247				17.14	4.37069	14.2833	156.959	0.523724				17.14	0.13574	14.2852	156.981	0.0162652
17.15	8.86846	14.2915	157.049	1.06268				17.15	4.37045	14.2919	157.054	0.523696				17.15	0.138998	14.2945	157.082	0.0166556
17.16	8.87163	14.301	157.154	1.06306				17.16	4.37125	14.3008	157.151	0.523791				17.16	0.13876	14.3024	157.169	0.0166271
17.17	8.87481	14.3109	157.262	1.06344				17.17	4.3745	14.3108	157.261	0.524181				17.17	0.136137	14.3099	157.251	0.0163128
17.18	8.8764	14.3199	157.361	1.06363				17.18	4.37721	14.3194	157.356	0.524505				17.18	0.136296	14.317	157.33	0.0163319
17.19	8.87728	14.3261	157.43	1.06373				17.19	4.3776	14.3269	157.438	0.524553				17.19	0.13876	14.325	157.418	0.0166271
17.2	8.87974	14.3334	157.51	1.06403				17.2	4.37808	14.3344	157.521	0.52461				17.2	0.138998	14.3356	157.534	0.0166556
17.21	8.88316	14.3417	157.602	1.06444				17.21	4.3815	14.3419	157.603	0.52502				17.21	0.137091	14.3451	157.639	0.0164271
17.22	8.88507	14.3505	157.698	1.06467				17.22	4.38547	14.3506	157.699	0.525496				17.22	0.13574	14.3529	157.724	0.0162652
17.23	8.88594	14.3604	157.806	1.06477				17.23	4.38571	14.3611	157.815	0.525524				17.23	0.13717	14.3595	157.797	0.0164366
17.24	8.88896	14.3691	157.903	1.06513				17.24	4.38404	14.3701	157.914	0.525324				17.24	0.139634	14.366	157.868	0.0167318
17.25	8.89349	14.3767	157.986	1.06568				17.25	4.38507	14.3775	157.995	0.525448				17.25	0.139157	14.3754	157.971	0.0166747
17.26	8.89571	14.3844	158.07	1.06594				17.26	4.38913	14.3841	158.067	0.525934				17.26	0.13574	14.386	158.088	0.0162652
17.27	8.89595	14.3919	158.153	1.06597				17.27	4.39159	14.3912	158.146	0.526229				17.27	0.135263	14.3954	158.191	0.0162081
17.28	8.8985	14.4002	158.245	1.06628				17.28	4.39095	14.4012	158.255	0.526153				17.28	0.138601	14.4026	158.271	0.016608
17.29	8.90342	14.4108	158.36	1.06687				17.29	4.39159	14.4116	158.37	0.526229				17.29	0.14027	14.4084	158.334	0.016808
17.3	8.90652	14.4201	158.463	1.06724				17.3	4.39517	14.4204	158.466	0.526657				17.3	0.138521	14.4164	158.422	0.0165985
17.31	8.90708	14.4279	158.548	1.0673				17.31	4.39779	14.4271	158.54	0.526972				17.31	0.137965	14.4259	158.526	0.0165318
17.32	8.90915	14.4344	158.62	1.06755				17.32	4.39779	14.4332	158.607	0.526972				17.32	0.14027	14.4356	158.633	0.016808
17.33	8.91352	14.4411	158.694	1.06808				17.33	4.39858	14.4414	158.696	0.527067				17.33	0.140667	14.445	158.736	0.0168556
17.34	8.91678	14.4507	158.799	1.06847				17.34	4.40232	14.4514	158.806	0.527514				17.34	0.137727	14.4516	158.809	0.0165033
17.35	8.91733	14.4612	158.915	1.06853				17.35	4.40558	14.4612	158.915	0.527905				17.35	0.135899	14.4588	158.887	0.0162843
17.36	8.91884	14.4704	159.015	1.06871				17.36	4.40526	14.4697	159.008	0.527867				17.36	0.137965	14.467	158.978	0.0165318
17.37	8.92377	14.4775	159.093	1.0693				17.37	4.40486	14.4759	159.076	0.527819				17.37	0.139872	14.4754	159.07	0.0167604
17.38	8.92854	14.4834	159.158	1.06988				17.38	4.40772	14.483	159.154	0.528162				17.38	0.139157	14.4853	159.179	0.0166747
17.39	8.92949	14.4914	159.246	1.06999				17.39	4.41154	14.4916	159.249	0.528619				17.39	0.137806	14.4944	159.279	0.0165128
17.4	8.9287	14.5008	159.349	1.06989				17.4	4.41241	14.5009	159.35	0.528724				17.4	0.138521	14.5021	159.364	0.0165985
17.41	8.93132	14.5106	159.457	1.07021				17.41	4.41162	14.5107	159.459	0.528629				17.41	0.139237	14.5095	159.445	0.0166842
17.42	8.93585	14.5199	159.559	1.07075				17.42	4.41345	14.5189	159.548	0.528848				17.42	0.138839	14.5169	159.526	0.0166366
17.43	8.93839	14.5265	159.632	1.07106				17.43	4.4171	14.5262	159.629	0.529286				17.43	0.13876	14.5251	159.617	0.0166271
17.44	8.93903	14.5335	159.709	1.07113				17.44	4.41821	14.5339	159.713	0.529419				17.44	0.139395	14.5356	159.732	0.0167033
17.45	8.94141	14.542	159.802	1.07142				17.45	4.41758	14.5415	159.797	0.529343				17.45	0.139872	14.5451	159.837	0.0167604
17.46	8.94562	14.5506	159.897	1.07192				17.46	4.41885	14.5505	159.896	0.529495				17.46	0.139793	14.553	159.923	0.0167509
17.47	8.94825	14.5604	160.004	1.07224				17.47	4.42235	14.5609	160.01	0.529914				17.47	0.139237	14.5596	159.996	0.0166842
17.48	8.94872	14.5695	160.104	1.07229				17.48	4.42433	14.5696	160.106	0.530152				17.48	0.139157	14.5663	160.069	0.0166747
17.49	8.95055	14.5774	160.191	1.07251				17.49	4.4237	14.5772	160.19	0.530076				17.49	0.139157	14.5756	160.172	0.0166747
17.5	8.95484	14.5849	160.273	1.07303				17.5	4.42433	14.5839	160.262	0.530152				17.5	0.138124	14.5861	160.287	0.0165509
17.51	8.95913	14.592	160.352	1.07354				17.51	4.42807	14.5911	160.342	0.5306				17.51	0.136773	14.5954	160.389	0.016389
17.52	8.96104	14.6003	160.442	1.07377				17.52	4.43133	14.601	160.451	0.53099				17.52	0.137727	14.6028	160.47	0.0165033
17.53	8.96223	14.6107	160.558	1.07391				17.53	4.43157	14.6115	160.566	0.531019				17.53	0.140826	14.6085	160.533	0.0168747
17.54	8.96533	14.6203	160.662	1.07428				17.54	4.43141	14.6201	160.661	0.531				17.54	0.141621	14.6163	160.618	0.0169699
17.55	8.96907	14.6281	160.749	1.07473				17.55	4.43347	14.627	160.736	0.531248				17.55	0.13876	14.6259	160.724	0.0166271
17.56	8.9705	14.6348	160.821	1.0749				17.56	4.43649	14.633	160.802	0.531609				17.56	0.137329	14.6356	160.831	0.0164557
17.57	8.97066	14.6414	160.894	1.07492				17.57	4.43729	14.6412	160.893	0.531705				17.57	0.14019	14.6449	160.933	0.0167985
17.58	8.97296	14.6509	160.999	1.0752				17.58	4.43673	14.6511	161.001	0.531638				17.58	0.142654	14.6517	161.008	0.0170937
17.59	8.97725	14.6614	161.114	1.07571				17.59	4.43832	14.6611	161.111	0.531828				17.59	0.140985	14.659	161.088	0.0168937
17.6	8.98035	14.6706	161.216	1.07608				17.6	4.44158	14.6698	161.206	0.532219				17.6	0.138601	14.6671	161.177	0.016608
17.61	8.98194	14.6777	161.294	1.07627				17.61	4.44309	14.676	161.275	0.5324				17.61	0.139793	14.6755	161.269	0.0167509
17.62	8.98512	14.6836	161.359	1.07666				17.62	4.44333	14.6832	161.354	0.532428				17.62	0.141621	14.6852	161.376	0.0169699
17.63	8.98941	14.6914	161.444	1.07717				17.63	4.445	14.6918	161.448	0.532628				17.63	0.140985	14.6945	161.478	0.0168937
17.64	8.99084	14.701	161.549	1.07734				17.64	4.44841	14.7007	161.547	0.533038				17.64	0.139395	14.7022	161.563	0.0167033
17.65	8.99045	14.7109	161.658	1.07729				17.65	4.45032	14.7108	161.657	0.533266				17.65	0.139157	14.7097	161.646	0.0166747
17.66	8.99267	14.7199	161.757	1.07756				17.66	4.45008	14.7191	161.749	0.533238				17.66	0.140588	14.7169	161.724	0.0168461
17.67	8.9976	14.7265	161.83	1.07815				17.67	4.45064	14.7265	161.83	0.533304				17.67	0.141859	14.7251	161.815	0.0169985
17.68	9.0003	14.7335	161.907	1.07847				17.68	4.45294	14.7341	161.914	0.533581				17.68	0.141223	14.7356	161.93	0.0169223
17.69	9.00006	14.7419	161.999	1.07845				17.69	4.45477	14.7417	161.997	0.5338				17.69	0.139872	14.7453	162.036	0.0167604
17.7	9.00157	14.7505	162.093	1.07863				17.7	4.45477	14.7506	162.095	0.5338				17.7	0.139872	14.753	162.121	0.0167604
17.71	9.00626	14.7604	162.202	1.07919				17.71	4.45541	14.761	162.209	0.533876				17.71	0.140588	14.7595	162.192	0.0168461
17.72	9.01016	14.7692	162.299	1.07966				17.72	4.45835	14.7701	162.309	0.534228				17.72	0.14019	14.7661	162.265	0.0167985
17.73	9.01024	14.777	162.385	1.07966				17.73	4.46113	14.7777	162.393	0.534562				17.73	0.139554	14.7756	162.37	0.0167223
17.74	9.01	14.7845	162.467	1.07964				17.74	4.46161	14.7843	162.464	0.534619				17.74	0.140429	14.7861	162.485	0.0168271
17.75	9.01413	14.7919	162.548	1.08013				17.75	4.46288	14.7914	162.543	0.534771				17.75	0.141223	14.7954	162.587	0.0169223
17.76	9.02073	14.8003	162.64	1.08092				17.76	4.46638	14.8011	162.65	0.53519				17.76	0.14027	14.8026	162.666	0.016808
17.77	9.02359	14.8106	162.754	1.08126				17.77	4.46916	14.8116	162.765	0.535523				17.77	0.139872	14.8085	162.731	0.0167604
17.78	9.02239	14.82	162.857	1.08112				17.78	4.469	14.8204	162.861	0.535504				17.78	0.140985	14.8164	162.817	0.0168937
17.79	9.02335	14.8279	162.944	1.08124				17.79	4.46884	14.8274	162.938	0.535485				17.79	0.141621	14.8257	162.92	0.0169699
17.8	9.02788	14.8344	163.015	1.08178				17.8	4.4717	14.8332	163.003	0.535828				17.8	0.140985	14.8356	163.029	0.0168937
17.81	9.03098	14.8411	163.089	1.08215				17.81	4.47504	14.8414	163.092	0.536228				17.81	0.141064	14.8449	163.131	0.0169032
17.82	9.03074	14.8507	163.195	1.08212				17.82	4.47575	14.8513	163.201	0.536314				17.82	0.142495	14.8514	163.202	0.0170747
17.83	9.03217	14.8611	163.309	1.08229				17.83	4.4748	14.8611	163.309	0.536199				17.83	0.143051	14.8586	163.282	0.0171413
17.84	9.03718	14.8704	163.411	1.08289				17.84	4.47559	14.8697	163.404	0.536295				17.84	0.142097	14.8669	163.372	0.017027
17.85	9.04147	14.8776	163.49	1.08341				17.85	4.47806	14.8759	163.471	0.53659				17.85	0.141859	14.8754	163.466	0.0169985
17.86	9.04234	14.8834	163.554	1.08351				17.86	4.47869	14.8833	163.552	0.536666				17.86	0.143131	14.8852	163.574	0.0171508
17.87	9.04377	14.8912	163.64	1.08368				17.87	4.47726	14.8918	163.646	0.536495				17.87	0.144164	14.8944	163.675	0.0172746
17.88	9.04822	14.9009	163.746	1.08422				17.88	4.47822	14.9009	163.746	0.536609				17.88	0.143369	14.9019	163.757	0.0171794
17.89	9.05196	14.9108	163.854	1.08466				17.89	4.48306	14.9108	163.854	0.53719				17.89	0.142018	14.9096	163.842	0.0170175
17.9	9.05299	14.9199	163.955	1.08479				17.9	4.48688	14.919	163.945	0.537647				17.9	0.142336	14.9169	163.922	0.0170556
17.91	9.05402	14.9266	164.029	1.08491				17.91	4.48569	14.9264	164.026	0.537504				17.91	0.144402	14.925	164.011	0.0173032
17.92	9.05728	14.9339	164.109	1.0853				17.92	4.48378	14.934	164.11	0.537276				17.92	0.145197	14.9356	164.128	0.0173984
17.93	9.06078	14.9421	164.199	1.08572				17.93	4.48688	14.9416	164.194	0.537647				17.93	0.143687	14.9452	164.234	0.0172175
17.94	9.06229	14.9506	164.293	1.0859				17.94	4.49204	14.9505	164.291	0.538266				17.94	0.143131	14.9531	164.32	0.0171508
17.95	9.06308	14.9604	164.4	1.086				17.95	4.49292	14.9609	164.405	0.538371				17.95	0.145753	14.9597	164.393	0.0174651
17.96	9.06634	14.9694	164.499	1.08639				17.96	4.49125	14.9699	164.504	0.538171				17.96	0.147263	14.9661	164.463	0.017646
17.97	9.07111	14.977	164.582	1.08696				17.97	4.49252	14.9771	164.584	0.538323				17.97	0.144164	14.9755	164.566	0.0172746
17.98	9.07334	14.9848	164.668	1.08723				17.98	4.49681	14.9839	164.658	0.538837				17.98	0.141223	14.9861	164.683	0.0169223
17.99	9.07318	14.992	164.747	1.08721				17.99	4.49864	14.9911	164.738	0.539056				17.99	0.143369	14.9954	164.784	0.0171794
18	9.07564	15.0001	164.837	1.0875				18	4.49777	15.001	164.846	0.538952				18	0.147184	15.0026	164.864	0.0176365
18.01	9.08097	15.0107	164.953	1.08814				18.01	4.49848	15.0114	164.96	0.539037				18.01	0.147025	15.0085	164.929	0.0176175
18.02	9.08391	15.0203	165.058	1.08849				18.02	4.5019	15.0201	165.056	0.539447				18.02	0.144402	15.0165	165.016	0.0173032
18.03	9.08327	15.028	165.143	1.08842				18.03	4.50396	15.027	165.132	0.539694				18.03	0.144084	15.0258	165.118	0.0172651
18.04	9.0843	15.0348	165.217	1.08854				18.04	4.50404	15.033	165.198	0.539704				18.04	0.145594	15.0355	165.225	0.0174461
18.05	9.08923	15.0414	165.29	1.08913				18.05	4.5046	15.0412	165.288	0.539771				18.05	0.145594	15.0449	165.328	0.0174461
18.06	9.09297	15.0506	165.392	1.08958				18.06	4.50706	15.0511	165.397	0.540066				18.06	0.144164	15.0518	165.404	0.0172746
18.07	9.09289	15.0612	165.508	1.08957				18.07	4.50993	15.0611	165.507	0.540409				18.07	0.144164	15.0587	165.481	0.0172746
18.08	9.09328	15.0704	165.609	1.08962				18.08	4.51159	15.0699	165.603	0.540609				18.08	0.145833	15.0669	165.57	0.0174746
18.09	9.09742	15.0776	165.688	1.09011				18.09	4.51263	15.0761	165.672	0.540732				18.09	0.147184	15.0754	165.664	0.0176365
18.1	9.10195	15.0835	165.753	1.09065				18.1	4.51469	15.0832	165.75	0.54098				18.1	0.14623	15.0851	165.771	0.0175222
18.11	9.10322	15.0914	165.839	1.09081				18.11	4.517	15.0919	165.845	0.541256				18.11	0.145117	15.0945	165.874	0.0173889
18.12	9.10385	15.1009	165.944	1.09088				18.12	4.51764	15.1009	165.944	0.541332				18.12	0.145992	15.1024	165.96	0.0174937
18.13	9.10775	15.1106	166.051	1.09135				18.13	4.51755	15.1107	166.052	0.541323				18.13	0.147661	15.1098	166.041	0.0176937
18.14	9.11323	15.1199	166.153	1.09201				18.14	4.51922	15.1192	166.146	0.541523				18.14	0.147184	15.1169	166.12	0.0176365
18.15	9.11593	15.1265	166.225	1.09233				18.15	4.52129	15.1267	166.228	0.54177				18.15	0.145833	15.1249	166.207	0.0174746
18.16	9.11601	15.1335	166.302	1.09234				18.16	4.52089	15.1342	166.31	0.541723				18.16	0.146627	15.1355	166.324	0.0175698
18.17	9.11705	15.1419	166.394	1.09246				18.17	4.52089	15.1418	166.393	0.541723				18.17	0.148217	15.1453	166.431	0.0177603
18.18	9.12007	15.1505	166.489	1.09283				18.18	4.52479	15.1505	166.489	0.542189				18.18	0.147263	15.1531	166.518	0.017646
18.19	9.12253	15.1604	166.598	1.09312				18.19	4.52956	15.1609	166.603	0.542761				18.19	0.146151	15.1596	166.589	0.0175127
18.2	9.12404	15.1694	166.696	1.0933				18.2	4.53035	15.17	166.703	0.542856				18.2	0.147581	15.1662	166.662	0.0176841
18.21	9.1265	15.1773	166.783	1.0936				18.21	4.52892	15.1775	166.786	0.542685				18.21	0.148853	15.1756	166.765	0.0178365
18.22	9.12992	15.1847	166.865	1.09401				18.22	4.53091	15.1841	166.859	0.542923				18.22	0.146866	15.1861	166.881	0.0175984
18.23	9.13199	15.1919	166.944	1.09425				18.23	4.53528	15.1913	166.937	0.543446				18.23	0.144799	15.1954	166.982	0.0173508
18.24	9.13302	15.2001	167.034	1.09438				18.24	4.53655	15.201	167.044	0.543599				18.24	0.145356	15.2027	167.063	0.0174175
18.25	9.13548	15.2106	167.15	1.09467				18.25	4.53472	15.2115	167.159	0.54338				18.25	0.146866	15.2086	167.128	0.0175984
18.26	9.13938	15.22	167.253	1.09514				18.26	4.53504	15.2204	167.257	0.543418				18.26	0.14623	15.2165	167.214	0.0175222
18.27	9.14184	15.2279	167.339	1.09543				18.27	4.53933	15.2274	167.334	0.543932				18.27	0.144084	15.2259	167.317	0.0172651
18.28	9.14272	15.2344	167.411	1.09554				18.28	4.54291	15.2332	167.398	0.544361				18.28	0.143766	15.2357	167.426	0.017227
18.29	9.14534	15.2411	167.485	1.09585				18.29	4.54227	15.2414	167.488	0.544284				18.29	0.146786	15.245	167.527	0.0175889
18.3	9.14947	15.2506	167.589	1.09635				18.3	4.5414	15.2513	167.596	0.54418				18.3	0.148853	15.2516	167.6	0.0178365
18.31	9.15217	15.2611	167.705	1.09667				18.31	4.54513	15.2611	167.705	0.544627				18.31	0.147263	15.2586	167.677	0.017646
18.32	9.15321	15.2704	167.806	1.0968				18.32	4.55046	15.2698	167.799	0.545265				18.32	0.145117	15.267	167.769	0.0173889
18.33	9.15511	15.2776	167.886	1.09703				18.33	4.55117	15.276	167.868	0.545351				18.33	0.146389	15.2756	167.864	0.0175413
18.34	9.15925	15.2835	167.951	1.09752				18.34	4.54887	15.2834	167.949	0.545075				18.34	0.149012	15.2854	167.971	0.0178555
18.35	9.1625	15.2915	168.038	1.09791				18.35	4.55006	15.2918	168.041	0.545218				18.35	0.148455	15.2944	168.07	0.0177889
18.36	9.16314	15.301	168.143	1.09799				18.36	4.55507	15.3008	168.14	0.545818				18.36	0.145594	15.3023	168.157	0.0174461
18.37	9.16409	15.3108	168.25	1.0981				18.37	4.55777	15.3108	168.25	0.546141				18.37	0.145594	15.3097	168.239	0.0174461
18.38	9.16807	15.32	168.352	1.09858				18.38	4.55713	15.3191	168.342	0.546065				18.38	0.149012	15.317	168.319	0.0178555
18.39	9.17276	15.3266	168.425	1.09914				18.39	4.55745	15.3264	168.422	0.546103				18.39	0.149886	15.3251	168.408	0.0179603
18.4	9.17339	15.3336	168.501	1.09922				18.4	4.56015	15.3339	168.504	0.546427				18.4	0.147184	15.3356	168.523	0.0176365
18.41	9.17236	15.342	168.593	1.09909				18.41	4.56285	15.3415	168.588	0.546751				18.41	0.146548	15.3451	168.628	0.0175603
18.42	9.17522	15.3506	168.688	1.09943				18.42	4.56365	15.3505	168.687	0.546846				18.42	0.149091	15.353	168.714	0.0178651
18.43	9.18039	15.3604	168.795	1.10005				18.43	4.56365	15.3609	168.801	0.546846				18.43	0.149727	15.3595	168.786	0.0179412
18.44	9.18301	15.3695	168.896	1.10037				18.44	4.56532	15.3695	168.896	0.547046				18.44	0.147422	15.3661	168.859	0.0176651
18.45	9.18309	15.3773	168.981	1.10038				18.45	4.56778	15.3771	168.979	0.547341				18.45	0.146627	15.3756	168.963	0.0175698
18.46	9.18547	15.3848	169.063	1.10066				18.46	4.56866	15.3837	169.052	0.547446				18.46	0.148694	15.3861	169.078	0.0178174
18.47	9.19064	15.3921	169.144	1.10128				18.47	4.56897	15.3911	169.133	0.547484				18.47	0.150283	15.3954	169.18	0.0180079
18.48	9.19414	15.4004	169.235	1.1017				18.48	4.57144	15.4011	169.243	0.547779				18.48	0.150283	15.4027	169.261	0.0180079
18.49	9.19437	15.411	169.352	1.10173				18.49	4.57414	15.4115	169.357	0.548103				18.49	0.149488	15.4085	169.324	0.0179127
18.5	9.19557	15.4204	169.455	1.10187				18.5	4.57398	15.4202	169.453	0.548084				18.5	0.148853	15.4162	169.409	0.0178365
18.51	9.20034	15.4281	169.54	1.10244				18.51	4.57319	15.4271	169.529	0.547989				18.51	0.148694	15.4259	169.515	0.0178174
18.52	9.2055	15.4349	169.614	1.10306				18.52	4.57541	15.4331	169.595	0.548255				18.52	0.149012	15.4356	169.622	0.0178555
18.53	9.20653	15.4415	169.687	1.10319				18.53	4.57827	15.4414	169.685	0.548598				18.53	0.149012	15.4449	169.724	0.0178555
18.54	9.2055	15.4509	169.79	1.10306				18.54	4.57827	15.4514	169.795	0.548598				18.54	0.14925	15.4516	169.798	0.0178841
18.55	9.20749	15.4612	169.904	1.1033				18.55	4.57867	15.4612	169.904	0.548646				18.55	0.150124	15.4588	169.876	0.0179889
18.56	9.21146	15.4705	170.005	1.10378				18.56	4.58256	15.4699	169.999	0.549113				18.56	0.150522	15.4669	169.966	0.0180365
18.57	9.21313	15.4778	170.085	1.10398				18.57	4.5863	15.4763	170.069	0.54956				18.57	0.149886	15.4754	170.059	0.0179603
18.58	9.21313	15.4835	170.148	1.10398				18.58	4.58646	15.4836	170.15	0.549579				18.58	0.149886	15.4851	170.166	0.0179603
18.59	9.21615	15.4914	170.235	1.10434				18.59	4.58574	15.492	170.242	0.549493				18.59	0.151157	15.4944	170.268	0.0181127
18.6	9.22108	15.501	170.341	1.10493				18.6	4.58813	15.5009	170.339	0.549779				18.6	0.151316	15.502	170.352	0.0181317
18.61	9.22283	15.5109	170.449	1.10514				18.61	4.59186	15.511	170.451	0.550227				18.61	0.15068	15.5095	170.434	0.0180555
18.62	9.22195	15.5199	170.548	1.10503				18.62	4.5929	15.5194	170.543	0.550351				18.62	0.152349	15.5166	170.512	0.0182555
18.63	9.22354	15.5265	170.621	1.10522				18.63	4.59131	15.5267	170.624	0.55016				18.63	0.154813	15.525	170.604	0.0185507
18.64	9.22855	15.5337	170.701	1.10582				18.64	4.59202	15.5341	170.705	0.550246				18.64	0.15378	15.5356	170.721	0.0184269
18.65	9.2326	15.5419	170.79	1.10631				18.65	4.59679	15.5418	170.788	0.550817				18.65	0.151078	15.5454	170.828	0.0181031
18.66	9.23387	15.5505	170.885	1.10646				18.66	4.60108	15.5508	170.887	0.551331				18.66	0.151396	15.5533	170.915	0.0181412
18.67	9.23538	15.5604	170.993	1.10664				18.67	4.60068	15.5611	171.001	0.551284				18.67	0.15378	15.5596	170.985	0.0184269
18.68	9.23944	15.5694	171.092	1.10713				18.68	4.60013	15.57	171.099	0.551217				18.68	0.154177	15.5663	171.058	0.0184745
18.69	9.24317	15.5769	171.175	1.10758				18.69	4.60386	15.5774	171.18	0.551665				18.69	0.152985	15.5755	171.159	0.0183317
18.7	9.24357	15.5844	171.257	1.10762				18.7	4.60871	15.5839	171.251	0.552246				18.7	0.152588	15.5861	171.276	0.0182841
18.71	9.24396	15.5917	171.338	1.10767				18.71	4.60855	15.5911	171.331	0.552227				18.71	0.153144	15.5954	171.378	0.0183507
18.72	9.2481	15.6003	171.431	1.10817				18.72	4.60625	15.6013	171.442	0.55195				18.72	0.153383	15.6026	171.457	0.0183793
18.73	9.25279	15.6106	171.545	1.10873				18.73	4.60808	15.6116	171.556	0.552169				18.73	0.153144	15.6084	171.521	0.0183507
18.74	9.25342	15.62	171.648	1.10881				18.74	4.61324	15.6201	171.65	0.552788				18.74	0.152349	15.6163	171.607	0.0182555
18.75	9.25239	15.6278	171.734	1.10868				18.75	4.61578	15.6266	171.721	0.553093				18.75	0.152191	15.6256	171.71	0.0182365
18.76	9.25525	15.6345	171.808	1.10902				18.76	4.61451	15.6327	171.788	0.552941				18.76	0.152826	15.6356	171.82	0.0183126
18.77	9.26065	15.6411	171.881	1.10967				18.77	4.61435	15.6412	171.882	0.552922				18.77	0.153144	15.6449	171.922	0.0183507
18.78	9.26296	15.6509	171.988	1.10995				18.78	4.61714	15.6515	171.995	0.553255				18.78	0.152588	15.6516	171.996	0.0182841
18.79	9.26248	15.6614	172.103	1.10989				18.79	4.6192	15.6613	172.102	0.553503				18.79	0.152747	15.6587	172.074	0.0183031
18.8	9.26439	15.6705	172.203	1.11012				18.8	4.6196	15.6696	172.194	0.55355				18.8	0.15386	15.667	172.165	0.0184364
18.81	9.26892	15.6776	172.282	1.11066				18.81	4.62151	15.6758	172.261	0.553779				18.81	0.15386	15.6755	172.258	0.0184364
18.82	9.27178	15.6836	172.348	1.111				18.82	4.62556	15.6831	172.342	0.554265				18.82	0.152429	15.6852	172.365	0.018265
18.83	9.27178	15.6915	172.434	1.111				18.83	4.62794	15.6916	172.435	0.55455				18.83	0.152429	15.6945	172.467	0.018265
18.84	9.27337	15.701	172.538	1.1112				18.84	4.62747	15.7007	172.536	0.554493				18.84	0.15386	15.7021	172.551	0.0184364
18.85	9.2783	15.7109	172.647	1.11179				18.85	4.62786	15.7109	172.647	0.554541				18.85	0.154177	15.7096	172.633	0.0184745
18.86	9.28251	15.72	172.747	1.11229				18.86	4.6312	15.719	172.736	0.554941				18.86	0.152985	15.7169	172.713	0.0183317
18.87	9.28354	15.7265	172.819	1.11241				18.87	4.6343	15.7261	172.815	0.555312				18.87	0.153224	15.7251	172.804	0.0183603
18.88	9.28497	15.7338	172.898	1.11259				18.88	4.63406	15.7339	172.9	0.555283				18.88	0.154654	15.7356	172.919	0.0185317
18.89	9.28966	15.742	172.989	1.11315				18.89	4.63406	15.7416	172.985	0.555283				18.89	0.154177	15.7453	173.025	0.0184745
18.9	9.29395	15.7506	173.084	1.11366				18.9	4.63732	15.7505	173.082	0.555674				18.9	0.151952	15.753	173.11	0.0182079
18.91	9.29443	15.7605	173.192	1.11372				18.91	4.64106	15.7609	173.196	0.556121				18.91	0.151555	15.7596	173.183	0.0181603
18.92	9.29403	15.7695	173.291	1.11367				18.92	4.64145	15.7696	173.293	0.556169				18.92	0.153383	15.7662	173.255	0.0183793
18.93	9.29689	15.777	173.374	1.11401				18.93	4.63978	15.7771	173.375	0.555969				18.93	0.15378	15.7755	173.357	0.0184269
18.94	9.30095	15.7846	173.457	1.1145				18.94	4.64129	15.7839	173.449	0.55615				18.94	0.152111	15.7861	173.474	0.0182269
18.95	9.30246	15.792	173.538	1.11468				18.95	4.64622	15.7911	173.529	0.55674				18.95	0.150522	15.7955	173.577	0.0180365
18.96	9.30246	15.8004	173.631	1.11468				18.96	4.64892	15.8011	173.639	0.557064				18.96	0.151555	15.8027	173.657	0.0181603
18.97	9.30492	15.8109	173.746	1.11498				18.97	4.64789	15.8115	173.753	0.55694				18.97	0.154177	15.8085	173.72	0.0184745
18.98	9.30977	15.8204	173.85	1.11556				18.98	4.64789	15.8202	173.849	0.55694				18.98	0.154575	15.8164	173.806	0.0185221
18.99	9.31287	15.8281	173.935	1.11593				18.99	4.65155	15.827	173.923	0.557378				18.99	0.152747	15.8257	173.909	0.0183031
19	9.31358	15.8347	174.008	1.11601				19	4.65441	15.833	173.989	0.557721				19	0.152985	15.8356	174.018	0.0183317
19.01	9.31621	15.8415	174.082	1.11633				19.01	4.65377	15.8415	174.082	0.557645				19.01	0.155608	15.8449	174.12	0.0186459
19.02	9.32074	15.851	174.187	1.11687				19.02	4.65345	15.8513	174.19	0.557607				19.02	0.156482	15.8515	174.192	0.0187507
19.03	9.32384	15.8615	174.302	1.11724				19.03	4.65592	15.8611	174.298	0.557902				19.03	0.154813	15.8585	174.269	0.0185507
19.04	9.32439	15.8706	174.403	1.11731				19.04	4.65854	15.8697	174.393	0.558217				19.04	0.154018	15.8667	174.36	0.0184555
19.05	9.3259	15.8776	174.479	1.11749				19.05	4.6587	15.8759	174.46	0.558236				19.05	0.156085	15.8752	174.453	0.0187031
19.06	9.33019	15.8835	174.544	1.118				19.06	4.65838	15.8831	174.54	0.558197				19.06	0.157515	15.8852	174.563	0.0188745
19.07	9.33313	15.8915	174.632	1.11836				19.07	4.66045	15.8918	174.635	0.558445				19.07	0.15529	15.8944	174.664	0.0186079
19.08	9.33313	15.9011	174.738	1.11836				19.08	4.66394	15.9009	174.735	0.558864				19.08	0.153383	15.9024	174.751	0.0183793
19.09	9.33409	15.911	174.846	1.11847				19.09	4.66538	15.911	174.846	0.559036				19.09	0.155687	15.9098	174.832	0.0186555
19.1	9.33862	15.92	174.945	1.11901				19.1	4.66498	15.9192	174.937	0.558988				19.1	0.159184	15.9169	174.911	0.0190745
19.11	9.34339	15.9264	175.015	1.11959				19.11	4.66601	15.9266	175.018	0.559112				19.11	0.159105	15.925	175	0.019065
19.12	9.34458	15.9335	175.093	1.11973				19.12	4.66919	15.9343	175.102	0.559493				19.12	0.156482	15.9356	175.117	0.0187507
19.13	9.34482	15.9419	175.185	1.11976				19.13	4.67094	15.9418	175.184	0.559702				19.13	0.155608	15.9451	175.221	0.0186459
19.14	9.34855	15.9507	175.283	1.1202				19.14	4.67094	15.9506	175.282	0.559702				19.14	0.156641	15.9529	175.306	0.0187697
19.15	9.35348	15.9606	175.392	1.12079				19.15	4.67269	15.961	175.396	0.559912				19.15	0.157038	15.9595	175.379	0.0188174
19.16	9.35507	15.9693	175.486	1.12098				19.16	4.67602	15.97	175.495	0.560312				19.16	0.156244	15.9661	175.452	0.0187221
19.17	9.35491	15.9765	175.566	1.12097				19.17	4.67722	15.9774	175.576	0.560454				19.17	0.155687	15.9754	175.554	0.0186555
19.18	9.35777	15.9842	175.651	1.12131				19.18	4.6765	15.984	175.648	0.560369				19.18	0.156323	15.986	175.67	0.0187316
19.19	9.36309	15.9919	175.735	1.12195				19.19	4.67857	15.9913	175.728	0.560616				19.19	0.156879	15.9954	175.773	0.0187983
19.2	9.36564	16.0004	175.828	1.12225				19.2	4.68278	16.0011	175.837	0.561121				19.2	0.155926	16.0026	175.853	0.018684
19.21	9.365	16.0109	175.944	1.12218				19.21	4.68492	16.0116	175.952	0.561378				19.21	0.155687	16.0083	175.915	0.0186555
19.22	9.36596	16.0203	176.047	1.12229				19.22	4.68524	16.0203	176.047	0.561416				19.22	0.156721	16.0164	176.004	0.0187793
19.23	9.37009	16.0278	176.129	1.12278				19.23	4.68659	16.0269	176.12	0.561578				19.23	0.156721	16.0257	176.107	0.0187793
19.24	9.37398	16.0344	176.202	1.12325				19.24	4.69001	16.033	176.187	0.561988				19.24	0.15529	16.0355	176.214	0.0186079
19.25	9.37541	16.0413	176.277	1.12342				19.25	4.69208	16.0414	176.279	0.562235				19.25	0.15529	16.0449	176.317	0.0186079
19.26	9.37676	16.051	176.385	1.12358				19.26	4.69168	16.0512	176.387	0.562188				19.26	0.157674	16.0515	176.39	0.0188935
19.27	9.38042	16.0615	176.5	1.12402				19.27	4.69192	16.0611	176.496	0.562216				19.27	0.158787	16.0586	176.468	0.0190269
19.28	9.38392	16.0705	176.599	1.12444				19.28	4.69478	16.0697	176.591	0.562559				19.28	0.157038	16.067	176.56	0.0188174
19.29	9.38535	16.0775	176.676	1.12461				19.29	4.69843	16.0757	176.657	0.562997				19.29	0.155846	16.0754	176.653	0.0186745
19.3	9.38725	16.0835	176.742	1.12484				19.3	4.69883	16.0831	176.738	0.563045				19.3	0.157913	16.0852	176.761	0.0189221
19.31	9.39131	16.0915	176.83	1.12533				19.31	4.69708	16.0916	176.831	0.562835				19.31	0.161012	16.0942	176.86	0.0192935
19.32	9.3948	16.101	176.934	1.12575				19.32	4.69883	16.1008	176.931	0.563045				19.32	0.161171	16.1019	176.944	0.0193126
19.33	9.3956	16.111	177.044	1.12584				19.33	4.7036	16.1107	177.041	0.563616				19.33	0.159343	16.1094	177.026	0.0190935
19.34	9.39568	16.12	177.143	1.12585				19.34	4.70543	16.1187	177.129	0.563835				19.34	0.159105	16.1167	177.107	0.019065
19.35	9.3987	16.1265	177.214	1.12621				19.35	4.704	16.1262	177.212	0.563664				19.35	0.160853	16.125	177.198	0.0192745
19.36	9.40307	16.1334	177.29	1.12674				19.36	4.70511	16.1339	177.295	0.563797				19.36	0.16125	16.1355	177.313	0.0193221
19.37	9.40466	16.1419	177.383	1.12693				19.37	4.71004	16.1415	177.379	0.564387				19.37	0.158389	16.1451	177.419	0.0189792
19.38	9.4045	16.1507	177.481	1.12691				19.38	4.7133	16.1505	177.478	0.564778				19.38	0.155687	16.1528	177.503	0.0186555
19.39	9.40736	16.1605	177.588	1.12725				19.39	4.71282	16.1609	177.592	0.564721				19.39	0.156482	16.1594	177.576	0.0187507
19.4	9.41332	16.1694	177.685	1.12797				19.4	4.7129	16.1696	177.688	0.56473				19.4	0.158946	16.1661	177.65	0.0190459
19.41	9.41658	16.1771	177.771	1.12836				19.41	4.7156	16.1773	177.772	0.565054				19.41	0.159343	16.1756	177.754	0.0190935
19.42	9.41602	16.1846	177.853	1.12829				19.42	4.71822	16.184	177.846	0.565368				19.42	0.158548	16.1863	177.871	0.0189983
19.43	9.41729	16.192	177.934	1.12844				19.43	4.71846	16.1911	177.925	0.565397				19.43	0.160376	16.1954	177.971	0.0192173
19.44	9.42214	16.2005	178.027	1.12902				19.44	4.71862	16.2011	178.034	0.565416				19.44	0.162681	16.2026	178.051	0.0194935
19.45	9.42524	16.211	178.143	1.12939				19.45	4.72109	16.2115	178.148	0.565711				19.45	0.16125	16.2084	178.114	0.0193221
19.46	9.42485	16.2203	178.245	1.12935				19.46	4.72442	16.2201	178.243	0.566111				19.46	0.158072	16.2161	178.199	0.0189412
19.47	9.42572	16.2279	178.328	1.12945				19.47	4.72601	16.227	178.319	0.566302				19.47	0.157754	16.2258	178.305	0.0189031
19.48	9.43025	16.2344	178.4	1.12999				19.48	4.72665	16.2329	178.383	0.566378				19.48	0.15982	16.2355	178.412	0.0191507
19.49	9.43478	16.2413	178.475	1.13054				19.49	4.72887	16.2413	178.475	0.566644				19.49	0.160456	16.2447	178.514	0.0192268
19.5	9.43494	16.251	178.582	1.13056				19.5	4.73165	16.2512	178.585	0.566978				19.5	0.15974	16.2515	178.588	0.0191411
19.51	9.43406	16.2615	178.698	1.13045				19.51	4.73221	16.2611	178.694	0.567044				19.51	0.159105	16.2586	178.666	0.019065
19.52	9.43724	16.2705	178.797	1.13083				19.52	4.73142	16.2697	178.788	0.566949				19.52	0.158548	16.2669	178.757	0.0189983
19.53	9.44297	16.2776	178.875	1.13152				19.53	4.73364	16.2761	178.858	0.567216				19.53	0.158707	16.2754	178.85	0.0190173
19.54	9.44591	16.2835	178.94	1.13187				19.54	4.73714	16.2832	178.937	0.567635				19.54	0.15982	16.2851	178.957	0.0191507
19.55	9.4463	16.2914	179.026	1.13192				19.55	4.73762	16.2918	179.03	0.567692				19.55	0.160138	16.2944	179.059	0.0191888
19.56	9.44829	16.3012	179.135	1.13216				19.56	4.73674	16.3006	179.128	0.567587				19.56	0.159343	16.302	179.143	0.0190935
19.57	9.45266	16.3111	179.243	1.13268				19.57	4.73881	16.3106	179.238	0.567835				19.57	0.158946	16.3095	179.225	0.0190459
19.58	9.45552	16.32	179.341	1.13302				19.58	4.74294	16.3191	179.331	0.56833				19.58	0.159581	16.3167	179.305	0.0191221
19.59	9.45592	16.3261	179.408	1.13307				19.59	4.74437	16.3265	179.412	0.568501				19.59	0.160615	16.3251	179.397	0.0192459
19.6	9.45799	16.3332	179.486	1.13332				19.6	4.74318	16.3343	179.497	0.568358				19.6	0.161568	16.3355	179.511	0.0193602
19.61	9.46212	16.3418	179.58	1.13381				19.61	4.74493	16.3418	179.58	0.568568				19.61	0.16125	16.3453	179.618	0.0193221
19.62	9.46442	16.3506	179.677	1.13409				19.62	4.75017	16.3505	179.676	0.569196				19.62	0.15974	16.3531	179.705	0.0191411
19.63	9.46371	16.3605	179.786	1.134				19.63	4.75327	16.361	179.791	0.569568				19.63	0.15982	16.3597	179.777	0.0191507
19.64	9.46434	16.3691	179.881	1.13408				19.64	4.75224	16.3701	179.892	0.569444				19.64	0.162442	16.3661	179.848	0.0194649
19.65	9.46808	16.3766	179.963	1.13453				19.65	4.75176	16.3775	179.973	0.569387				19.65	0.163237	16.3754	179.949	0.0195602
19.66	9.47134	16.3841	180.045	1.13492				19.66	4.75573	16.3841	180.045	0.569863				19.66	0.160456	16.386	180.066	0.0192268
19.67	9.47245	16.3916	180.128	1.13505				19.67	4.76058	16.3911	180.122	0.570444				19.67	0.159979	16.3954	180.169	0.0191697
19.68	9.47467	16.4002	180.223	1.13532				19.68	4.76058	16.401	180.231	0.570444				19.68	0.163476	16.4028	180.25	0.0195887
19.69	9.47944	16.4108	180.338	1.13589				19.69	4.7582	16.4115	180.346	0.570158				19.69	0.165145	16.4086	180.315	0.0197887
19.7	9.48366	16.4199	180.438	1.13639				19.7	4.75979	16.4202	180.442	0.570349				19.7	0.162284	16.4165	180.401	0.0194459
19.71	9.48373	16.4276	180.523	1.1364				19.71	4.7648	16.4271	180.518	0.570949				19.71	0.15982	16.4258	180.503	0.0191507
19.72	9.48334	16.4342	180.596	1.13635				19.72	4.76742	16.4333	180.585	0.571263				19.72	0.161012	16.4354	180.609	0.0192935
19.73	9.48675	16.441	180.67	1.13676				19.73	4.76638	16.4415	180.676	0.571139				19.73	0.162919	16.4449	180.713	0.0195221
19.74	9.49152	16.4507	180.777	1.13734				19.74	4.76726	16.4513	180.783	0.571244				19.74	0.162204	16.4518	180.788	0.0194363
19.75	9.49303	16.4611	180.892	1.13752				19.75	4.7725	16.4611	180.892	0.571872				19.75	0.160138	16.4587	180.865	0.0191888
19.76	9.49303	16.4703	180.992	1.13752				19.76	4.77648	16.47	180.989	0.572349				19.76	0.15982	16.4669	180.955	0.0191507
19.77	9.49621	16.4774	181.07	1.1379				19.77	4.77584	16.4761	181.056	0.572272				19.77	0.162442	16.4752	181.047	0.0194649
19.78	9.50201	16.4831	181.133	1.13859				19.78	4.77481	16.4831	181.133	0.572149				19.78	0.164111	16.4851	181.155	0.0196649
19.79	9.50511	16.4911	181.221	1.13896				19.79	4.77767	16.4917	181.228	0.572491				19.79	0.16284	16.4944	181.257	0.0195125
19.8	9.50432	16.501	181.33	1.13887				19.8	4.78061	16.5006	181.326	0.572844				19.8	0.16125	16.5021	181.342	0.0193221
19.81	9.50511	16.5109	181.438	1.13896				19.81	4.78013	16.5106	181.435	0.572787				19.81	0.162442	16.5098	181.426	0.0194649
19.82	9.5094	16.5199	181.537	1.13948				19.82	4.7791	16.519	181.527	0.572663				19.82	0.16427	16.5169	181.504	0.0196839
19.83	9.51338	16.5263	181.607	1.13995				19.83	4.78077	16.5265	181.61	0.572863				19.83	0.16284	16.525	181.593	0.0195125
19.84	9.51401	16.5335	181.687	1.14003				19.84	4.78347	16.5341	181.694	0.573187				19.84	0.160853	16.5356	181.71	0.0192745
19.85	9.51473	16.5419	181.779	1.14012				19.85	4.7849	16.5416	181.776	0.573358				19.85	0.162045	16.5454	181.817	0.0194173
19.86	9.51846	16.5505	181.874	1.14056				19.86	4.78617	16.5505	181.874	0.57351				19.86	0.16427	16.5532	181.904	0.0196839
19.87	9.5226	16.5604	181.982	1.14106				19.87	4.78903	16.5609	181.988	0.573853				19.87	0.163873	16.5598	181.975	0.0196363
19.88	9.52339	16.5694	182.081	1.14115				19.88	4.7919	16.5699	182.087	0.574196				19.88	0.162919	16.5664	182.048	0.0195221
19.89	9.52284	16.5769	182.164	1.14109				19.89	4.79277	16.5774	182.169	0.574301				19.89	0.163953	16.5756	182.15	0.0196459
19.9	9.5249	16.5845	182.247	1.14134				19.9	4.79293	16.584	182.242	0.57432				19.9	0.165065	16.5862	182.266	0.0197792
19.91	9.52904	16.5919	182.328	1.14183				19.91	4.79476	16.5911	182.32	0.574539				19.91	0.163635	16.5956	182.369	0.0196078
19.92	9.53142	16.6001	182.419	1.14212				19.92	4.7973	16.6009	182.427	0.574844				19.92	0.16284	16.6029	182.449	0.0195125
19.93	9.53205	16.6107	182.536	1.14219				19.93	4.79833	16.6114	182.543	0.574967				19.93	0.165303	16.6088	182.514	0.0198077
19.94	9.53491	16.6201	182.639	1.14254				19.94	4.79833	16.6202	182.64	0.574967				19.94	0.167449	16.6165	182.599	0.0200649
19.95	9.53952	16.628	182.725	1.14309				19.95	4.80016	16.6271	182.716	0.575186				19.95	0.165542	16.6258	182.701	0.0198363
19.96	9.54294	16.6346	182.798	1.1435				19.96	4.80405	16.6331	182.782	0.575653				19.96	0.163237	16.6354	182.806	0.0195602
[truncated: 9,127 more rows]
